# Supplementary material
Source: PubMed Central journal article supplement (PMC4557776)

# Supporting Information

## Palladium(II)-Catalyzed Tandem Oxidative Acetoxylation/*ortho* C-H Activation/Carbo-cyclization of Arylallenes

Javier Mazuela, Debasis Banerjee, and Jan-E. Bäckvall\*

*Department of Organic Chemistry, Arrhenius Laboratory,  
Stockholm University, SE-106 91 Stockholm, Sweden*

## Index

|                                                                                                                          |     |
|--------------------------------------------------------------------------------------------------------------------------|-----|
| General information                                                                                                      | S3  |
| Preparation of starting materials                                                                                        | S3  |
| Typical Experimental Procedure                                                                                           | S11 |
| Selected optimization results                                                                                            | S11 |
| Characterization products                                                                                                | S14 |
| Characterization of side product                                                                                         | S21 |
| Kinetic Experiments                                                                                                      | S22 |
| Calculations Kinetic Isotopic Effect (KIE)                                                                               | S25 |
| Carbocyclization using <i>Diethyl 2-(3-methylbuta-1,2-dien-1-yl)-2-phenyl-malonnate-d<sub>6</sub> (1a-d<sub>6</sub>)</i> | S26 |
| References                                                                                                               | S26 |
| NMR Spectra                                                                                                              | S27 |

## General information

Unless otherwise noted, all reagents were used as received from the commercial suppliers. Pd(OAc)<sub>2</sub> was obtained from Pressure Chemicals and used without further purification. Commercially available benzoquinone was separated from insoluble impurities by dissolving it in refluxing cyclohexane and decanting. After evaporation, benzoquinone was obtained as yellow needles. The cyclization reactions described in this report were performed without any efforts to exclude moisture unless otherwise noted. AcOH (p.a. grade) were purchased from Sigma Aldrich. Dry THF and DMF for the preparation of starting materials were obtained from a VAC Solvent Purifier. Reactions were monitored using thin-layer chromatography (SiO<sub>2</sub>). TLC plates were visualized with UV light (254 nm), vanillin stain or KMnO<sub>4</sub> stain. Flash chromatography was carried out with 60Å (particle size 35–70 µm) normal flash silica gel. NMR spectra were recorded at 400 MHz (<sup>1</sup>H) or 500 MHz (<sup>1</sup>H) and at 100 MHz (<sup>13</sup>C) or 125 MHz (<sup>13</sup>C), respectively. Chemical shifts (δ) are reported in ppm, using the residual solvent peak in CDCl<sub>3</sub> (δH = 7.26 and δC = 77.16 ppm) as internal standard, and coupling constants (J) are given in Hz. HRMS were recorded using ESI-TOF techniques.

## Preparation of starting materials

All bromoallenes were prepared according to the procedure published by Landor with minor modifications.<sup>1</sup> Diethyl arylmalonates were prepared as described in literature.<sup>2</sup>

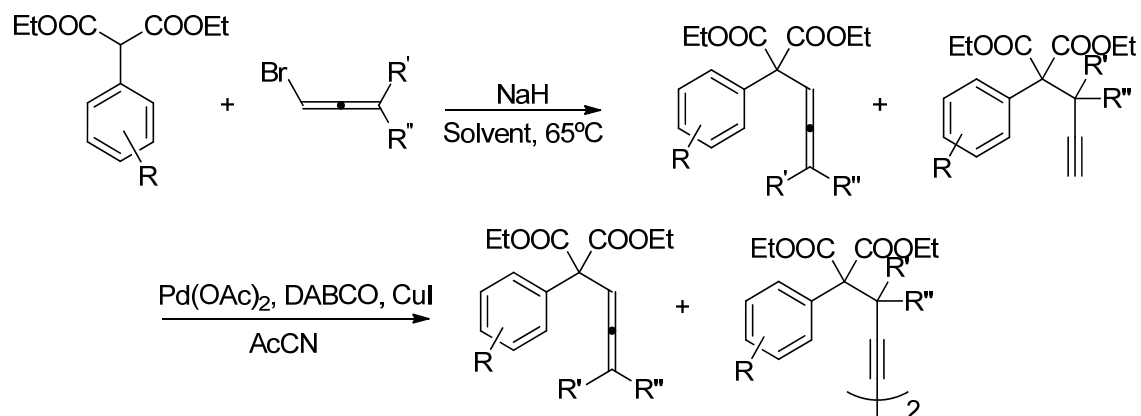

*Representative procedure for the synthesis of allenes 1. Diethyl 2-(3-methylbuta-1,2-dien-1-yl)-2-phenylmalonate (**1a**)*

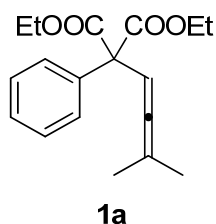

To a suspension of NaH (60% in mineral oil, 840 mg, 20.1 mmol) in anhydrous THF (150 ml) was added a solution of diethyl phenylmalonate (3.8 g, 3.5 mL, 16.0 mmol) in anhydrous THF (10 ml) at 0 °C. After the addition, the mixture was stirred for another 20 min at r.t. Then a solution of 1-bromo-3-methylbuta-1,2-diene (4.8 g, 32.0 mmol) in anhydrous THF (10 ml) was added at r.t. and the resulting mixture was stirred for 20h at 65 °C. After the reaction was complete as monitored by TLC, it was cooled to room temperature. The reaction mixture was diluted with 50 mL of Et<sub>2</sub>O and quenched with 30 mL of water. The organic layer was separated, and the aqueous layer was extracted with diethyl ether (2 x 50 mL). The combined organic layers were dried over MgSO<sub>4</sub>. Evaporation and column chromatography on silica gel (petroleum ether/ethyl acetate = 25/1) afforded 4g of a 5:1 mixture of product **1a**:terminal alkyne. This mixture was dissolved in acetonitrile and Pd(OAc)<sub>2</sub> (12 mg, 0.053 mmols), CuI (11 mg, 0.053 mmols) and DABCO (892 mg, 7.95 mmols) were added. The resulting mixture was stirred overnight at room temperature. The reaction mixture was diluted with 50 mL of Et<sub>2</sub>O and quenched with 30 mL of water. The organic layer was separated, and the aqueous layer was extracted with diethyl ether (2 x 50 mL). The combined organic layers were dried over MgSO<sub>4</sub>. Evaporation and column chromatography on silica gel (petroleum ether/ethyl acetate = 25/1) afforded **1a** as a colorless oil (2.88 g, 60%).

<sup>1</sup>H NMR (500 MHz, CDCl<sub>3</sub>): δ 7.47-7.42 (m, 2H), 7.38-7.28 (m, 3H), 5.83 (h, 1H, *J* = 2.8 Hz), 4.26 (m, 4H), 1.66 (d, 6H, *J* = 2.8 Hz), 1.28 (t, 6H, *J* = 7.2 Hz); <sup>13</sup>C NMR (125 MHz, CDCl<sub>3</sub>): δ 202.3, 169.9, 137.5, 128.5, 127.9, 127.6, 99.7, 90.6, 64.5, 61.8, 19.8, 14.0; HRMS (ESI): calc. for C<sub>18</sub>H<sub>22</sub>O<sub>4</sub> [M+Na]<sup>+</sup> : 325.1410; found: 325.1435.

*Diethyl 2-(3-methylbuta-1,2-dien-1-yl)-2-(o-tolyl)malonate (1b)*

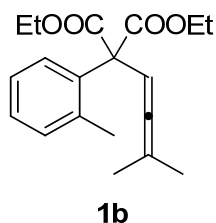

57% Isolated yield, colorless oil. <sup>1</sup>H NMR (500 MHz, CDCl<sub>3</sub>): δ 7.23-7.10 (m, 4H), 5.85 (h, 1H, *J* = 2.8 Hz), 4.28 (m, 4H), 2.25 (s, 3H), 1.50 (d, 6H, *J* = 2.8 Hz), 1.29 (t, 6H, *J* = 7.2 Hz); <sup>13</sup>C NMR (125 MHz, CDCl<sub>3</sub>): δ 202.9, 170.5, 137.3, 136.8, 131.5, 128.0, 127.3, 125.4, 99.3, 90.7, 65.2, 62.0, 21.2, 19.4, 14.0; HRMS (ESI): calc. for C<sub>19</sub>H<sub>24</sub>O<sub>4</sub> [M+Na]<sup>+</sup> : 339.1567; found: 339.1579.

*Diethyl 2-(3-methylbuta-1,2-dien-1-yl)-2-(m-tolyl)malonate (1c)*

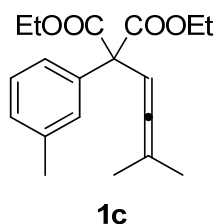

55% Isolated yield, colorless oil.  $^1\text{H}$  NMR (500 MHz,  $\text{CDCl}_3$ ):  $\delta$  7.27-7.21 (m, 3H), 7.15-7.09 (m, 1H), 5.82 (h, 1H,  $J = 2.9$  Hz), 4.26 (m, 4H), 2.37 (s, 3H), 1.67 (d, 6H,  $J = 2.9$  Hz), 1.29 (t, 6H,  $J = 7.2$  Hz);  $^{13}\text{C}$  NMR (125 MHz,  $\text{CDCl}_3$ ):  $\delta$  202.4, 169.8, 137.3, 129.2, 128.3, 127.8, 125.5, 99.6, 90.6, 64.5, 61.8, 21.6, 19.9, 14.0; HRMS (ESI): calc. for  $\text{C}_{19}\text{H}_{24}\text{O}_4$   $[\text{M}+\text{Na}]^+$ : 339.1567; found: 339.1588.

*Diethyl 2-(3-methylbuta-1,2-dien-1-yl)-2-(p-tolyl)malonate (1d)*

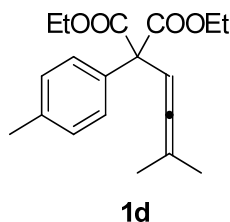

55% Isolated yield, colorless oil.  $^1\text{H}$  NMR (500 MHz,  $\text{CDCl}_3$ ):  $\delta$  7.36-7.32 (m, 2H), 7.18-7.13 (m, 2H), 5.82 (h, 1H,  $J = 2.9$  Hz), 4.25 (m, 4H), 2.35 (s, 3H), 1.67 (d, 6H,  $J = 2.9$  Hz), 1.29 (t, 6H,  $J = 7.2$  Hz);  $^{13}\text{C}$  NMR (125 MHz,  $\text{CDCl}_3$ ):  $\delta$  202.1, 170.0, 137.3, 134.5, 128.6, 128.3, 99.5, 90.5, 64.1, 61.7, 21.0, 19.9, 14.0; HRMS (ESI): calc. for  $\text{C}_{19}\text{H}_{24}\text{O}_4$   $[\text{M}+\text{Na}]^+$ : 339.1567; found: 339.1586.

*Diethyl 2-(3-methoxyphenyl)-2-(3-methylbuta-1,2-dien-1-yl)malonate (1e)*

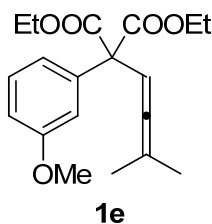

64% Isolated yield, yellow oil.  $^1\text{H}$  NMR (500 MHz,  $\text{CDCl}_3$ ):  $\delta$  7.27-7.23 (m, 1H), 7.07-7.01 (m, 2H), 6.88-7.81 (m, 1H), 5.81 (h, 1H,  $J = 2.9$  Hz), 4.25 (m, 4H), 3.81 (s, 3H), 1.68 (d, 6H,  $J = 2.9$  Hz), 1.29 (t, 6H,  $J = 7.2$  Hz);  $^{13}\text{C}$  NMR (125 MHz,  $\text{CDCl}_3$ ):  $\delta$  202.2, 169.7, 159.1, 138.9, 128.8, 120.9, 114.7, 113.0, 99.6, 90.4, 64.4, 61.8, 55.2, 19.9, 14.0; HRMS (ESI): calc. for  $\text{C}_{19}\text{H}_{24}\text{O}_5$   $[\text{M}+\text{Na}]^+$ : 355.1516; found: 355.1545.

*Diethyl 2-(4-methoxyphenyl)-2-(3-methylbuta-1,2-dien-1-yl)malonate (1f)*

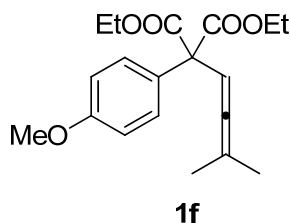

68% Isolated yield, yellow oil.  $^1\text{H}$  NMR (500 MHz,  $\text{CDCl}_3$ ):  $\delta$  7.42-7.35 (m, 2H), 6.91-6.85 (m, 2H), 5.82 (h, 1H,  $J = 2.9$  Hz), 4.24 (m, 4H), 3.82 (s, 3H), 1.67 (d, 6H,  $J = 2.9$  Hz), 1.29 (t, 6H,  $J = 7.2$  Hz);  $^{13}\text{C}$  NMR (125 MHz,  $\text{CDCl}_3$ ):  $\delta$  202.1, 170.1, 158.9,

129.7, 129.6, 113.3, 99.6, 90.6, 63.8, 61.7, 55.2, 19.9, 14.0; HRMS (ESI): calc. for  $C_{19}H_{24}O_5$   $[M+Na]^+$ : 355.1516; found: 355.1529.

*Diethyl 2-(3-methylbuta-1,2-dien-1-yl)-2-(3,4,5-trimethoxyphenyl)malonate (1g)*

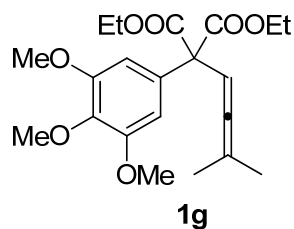

70% Isolated yield, yellow oil.  $^1H$  NMR (500 MHz,  $CDCl_3$ ):  $\delta$  6.74 (s, 2H), 5.83 (h, 1H,  $J = 2.8$  Hz), 4.27 (m, 4H), 3.87 (s, 3H), 3.86 (s, 6H), 1.69 (d, 6H,  $J = 2.8$  Hz), 1.31 (t, 6H,  $J = 7.2$  Hz);  $^{13}C$  NMR (125 MHz,  $CDCl_3$ ):  $\delta$  202.2, 169.7, 152.5, 137.6, 132.8, 106.1, 99.7, 90.4, 64.3, 61.8, 60.8, 56.1, 19.9, 14.0; HRMS (ESI): calc. for  $C_{21}H_{28}O_7$   $[M+Na]^+$ : 415.1727; found: 415.1752.

*Diethyl 2-(4-fluorophenyl)-2-(3-methylbuta-1,2-dien-1-yl)malonate (1h)*

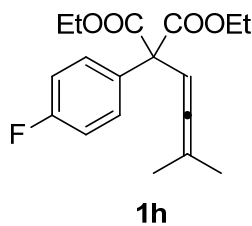

52% Isolated yield, colorless oil.  $^1H$  NMR (500 MHz,  $CDCl_3$ ):  $\delta$  7.47-7.39 (m, 2H), 7.08-6.98 (m, 2H), 5.81 (h, 1H,  $J = 2.9$  Hz), 4.26 (m, 4H), 1.65 (d, 6H,  $J = 2.9$  Hz), 1.29 (t, 6H,  $J = 7.2$  Hz);  $^{13}C$  NMR (125 MHz,  $CDCl_3$ ):  $\delta$  202.4, 169.7, 163.4, 160.9, 133.3, 130.4, 114.6, 99.9, 90.5, 63.8, 61.9, 19.8, 14.0; HRMS (ESI): calc. for  $C_{18}H_{21}FO_4$   $[M+Na]^+$ : 343.1316; found: 343.1332.

*Diethyl 2-(3-methylbuta-1,2-dien-1-yl)-2-(3-(trifluoromethyl)phenyl)malonate (1i)*

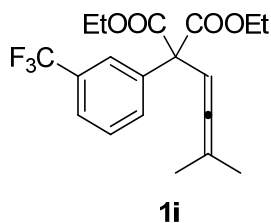

Following the general procedure but using DMF as solvent instead of THF. 45% Isolated yield, colorless oil.  $^1H$  NMR (500 MHz,  $CDCl_3$ ):  $\delta$  7.75 (s, 1H), 7.65-7.55 (m, 2H), 7.50-7.44 (m, 1H), 5.85 (h, 1H,  $J = 2.9$  Hz), 4.28 (m, 4H), 1.63 (d, 6H,  $J = 2.9$  Hz), 1.30 (t, 6H,  $J = 7.2$  Hz);  $^{13}C$  NMR (125 MHz,  $CDCl_3$ ):  $\delta$  202.7, 169.8, 138.4, 132.0, 130.3, 130.0, 128.2, 125.8, 125.7, 125.5, 125.4, 124.4, 124.3, 122.8, 100.4, 90.3, 64.1,

61.2, 19.6, 14.0; HRMS (ESI): calc. for  $C_{19}H_{21}F_3O_4$   $[M+Na]^+$ : 393.1284; found: 393.1288.

*Diethyl 2-(3-methylbuta-1,2-dien-1-yl)-2-(4-(trifluoromethyl)phenyl)malonate (1j)*

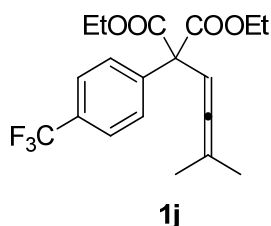

Following the general procedure but using DMF as solvent instead of THF. 47% Isolated yield, colorless oil.  $^1H$  NMR (500 MHz,  $CDCl_3$ ):  $\delta$  7.63-7.56 (m, 4H), 5.84 (h, 1H,  $J = 2.9$  Hz), 4.28 (m, 4H), 1.64 (d, 6H,  $J = 2.9$  Hz), 1.29 (t, 6H,  $J = 7.2$  Hz);  $^{13}C$  NMR (125 MHz,  $CDCl_3$ ):  $\delta$  202.6, 169.2, 141.5, 129.6, 129.1, 124.7, 122.7, 100.2, 90.2, 64.2, 62.1, 19.7, 14.0; HRMS (ESI): calc. for  $C_{19}H_{21}F_3O_4$   $[M+Na]^+$ : 393.1284; found: 393.1267.

*Diethyl 2-(2-(methoxycarbonyl)phenyl)-2-(3-methylbuta-1,2-dien-1-yl)malonate (1k)*

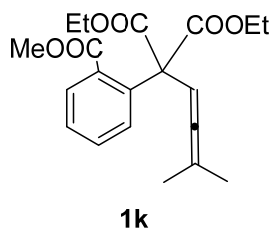

Following the general procedure but using DMF as solvent instead of THF. 43% Isolated yield, colorless oil.  $^1H$  NMR (500 MHz,  $CDCl_3$ ):  $\delta$  7.91 (dd, 1H,  $J = 7.8$  Hz,  $J = 1.5$  Hz), 7.47 (td, 1H,  $J = 7.8$  Hz, 1.6 Hz), 7.37 (td, 1H,  $J = 7.8$  Hz, 1.6 Hz), 7.26 (dd, 1H,  $J = 7.8$  Hz,  $J = 1.5$  Hz), 5.90 (h, 1H,  $J = 2.9$  Hz), 4.25 (m, 4H), 3.81 (s, 3H), 1.50 (d, 6H,  $J = 2.9$  Hz), 1.26 (t, 6H,  $J = 7.2$  Hz);  $^{13}C$  NMR (125 MHz,  $CDCl_3$ ):  $\delta$  202.9, 169.8, 168.1, 139.5, 131.3, 130.9, 130.5, 129.8, 127.2, 92.1, 65.4, 61.9, 51.8, 21.6, 19.5, 13.9; HRMS (ESI): calc. for  $C_{20}H_{24}O_6$   $[M+Na]^+$ : 383.1465; found: 383.1468.

*Diethyl 2-(3-(methoxycarbonyl)phenyl)-2-(3-methylbuta-1,2-dien-1-yl)malonate (1l)*

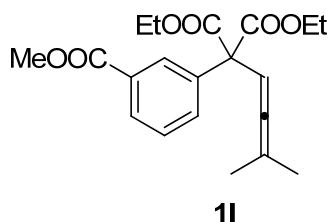

Following the general procedure but using DMF as solvent instead of THF. 47% Isolated yield, colorless oil.  $^1H$  NMR (500 MHz,  $CDCl_3$ ):  $\delta$  8.18-8.15 (m, 1H), 8.02-7.97 (m, 1H), 7.68-7.63 (m, 1H), 7.43 (t, 1H,  $J = 7.8$  Hz), 5.85 (h, 1H,  $J = 2.9$  Hz), 4.27

(m, 4H), 3.92 (s, 3H), 1.65 (d, 6H,  $J = 2.9$  Hz), 1.29 (t, 6H,  $J = 7.2$  Hz);  $^{13}\text{C}$  NMR (125 MHz,  $\text{CDCl}_3$ ):  $\delta$  202.6, 169.5, 166.9, 137.9, 133.3, 129.9, 129.8, 128.8, 127.9, 100.1, 90.3, 64.2, 62.0, 52.1, 19.7, 14.0; HRMS (ESI): calc. for  $\text{C}_{20}\text{H}_{24}\text{O}_6$   $[\text{M}+\text{Na}]^+$ : 383.1465; found: 383.1479.

*Diethyl 2-(4-(methoxycarbonyl)phenyl)-2-(3-methylbuta-1,2-dien-1-yl)malonate (1m)*

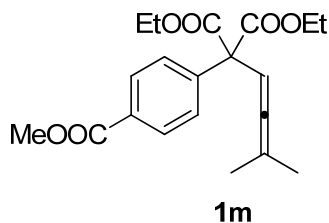

Following the general procedure but using DMF as solvent instead of THF. 40% Isolated yield, colorless oil.  $^1\text{H}$  NMR (500 MHz,  $\text{CDCl}_3$ ):  $\delta$  8.04-7.99 (m, 2H), 7.55-7.51 (m, 2H), 5.84 (d, 1H,  $J = 2.9$  Hz), 4.26 (m, 4H), 3.94 (s, 3H), 1.63 (d, 6H,  $J = 2.9$  Hz), 1.29 (t, 6H,  $J = 7.2$  Hz);  $^{13}\text{C}$  NMR (125 MHz,  $\text{CDCl}_3$ ):  $\delta$  202.6, 169.3, 166.8, 142.6, 129.1, 128.7, 100.1, 90.3, 64.4, 62.0, 52.1, 19.7, 14.0; HRMS (ESI): calc. for  $\text{C}_{20}\text{H}_{24}\text{O}_6$   $[\text{M}+\text{Na}]^+$ : 383.1465; found: 383.1477.

*Diethyl 2-(3-methylbuta-1,2-dien-1-yl)-2-(naphthalen-2-yl)malonate (1n)*

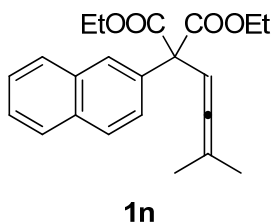

30% Isolated yield, white solid.  $^1\text{H}$  NMR (500 MHz,  $\text{CDCl}_3$ ):  $\delta$  7.92-7.89 (m, 1H), 7.87-7.79 (m, 3H), 7.61-7.56 (m, 1H), 7.52-7.46 (m, 2H), 5.93 (h, 1H,  $J = 2.9$  Hz), 4.29 (m, 4H), 1.67 (d, 6H,  $J = 2.9$  Hz), 1.30 (t, 6H,  $J = 7.2$  Hz);  $^{13}\text{C}$  NMR (125 MHz,  $\text{CDCl}_3$ ):  $\delta$  202.6, 169.9, 135.4, 132.9, 132.7, 128.3, 127.4, 127.3, 127.2, 126.9, 126.2, 125.9, 99.7, 90.5, 64.5, 61.9, 19.8, 14.0; HRMS (ESI): calc. for  $\text{C}_{22}\text{H}_{24}\text{O}_4$   $[\text{M}+\text{Na}]^+$ : 375.1567; found: 375.1568.

*Diethyl 2-(3-methylbuta-1,2-dien-1-yl)-2-(phenanthren-9-yl)malonate (1o)*

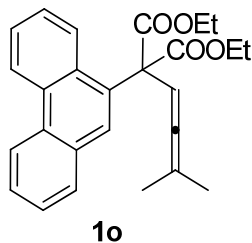

25% Isolated yield, white solid.  $^1\text{H}$  NMR (500 MHz,  $\text{CDCl}_3$ ):  $\delta$  8.70 (dd, 2H,  $J = 20.2$ ,  $J = 8.7$ ), 7.88 (dd, 2H,  $J = 20.2$ ,  $J = 8.7$ ), 7.70-7.64 (m, 2H), 7.63-7.57 (m, 2H), 7.55-

7.49 (m, 1H), 6.07 (h, 1H,  $J = 2.9$  Hz), 4.30 (m, 4H), 1.23 (m, 12H);  $^{13}\text{C}$  NMR (125 MHz,  $\text{CDCl}_3$ ):  $\delta$  203.9, 170.4, 133.1, 131.1, 130.4, 130.1, 129.1, 127.5, 127.1, 127.0, 162.6, 125.9, 125.6, 123.0, 122.3, 99.8, 90.9, 65.4, 62.1, 19.0, 13.9; HRMS (ESI): calc. for  $\text{C}_{26}\text{H}_{26}\text{O}_4$   $[\text{M}+\text{Na}]^+$ : 425.1723; found: 425.1738.

2-(3-methylbuta-1,2-dien-1-yl)-2-phenylpropane-1,3-diol (**1p**)

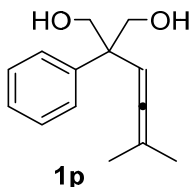

To a suspension of  $\text{LiAlH}_4$  (233 mg, 6.15 mmols) in 40 mL  $\text{Et}_2\text{O}$  at  $0^\circ\text{C}$ , a solution of **1a** (600mg, 1.98 mmols) in 10 mL  $\text{Et}_2\text{O}$  were added. The mixture was stirred overnight at rt. The reaction mixture was quenched with 20 mL of water. The organic layer was separated, and the aqueous layer was extracted with diethyl ether (2 x 25 mL). The combined organic layers were dried over  $\text{MgSO}_4$ . Evaporation and column chromatography on silica gel (petroleum ether/ethyl acetate = 3/1) afforded 412 mg of product **1p** (95% yield) as a white solid.  $^1\text{H}$  NMR (500 MHz,  $\text{CDCl}_3$ ):  $\delta$  7.50-7.44 (m, 2H), 7.42-7.36 (m, 2H), 7.32-7.26 (m, 1H), 5.20 (h, 1H,  $J = 2.9$  Hz), 4.10-3.91 (m, 4H), 1.98 (b, 2H), 1.79 (d, 6H,  $J = 2.9$  Hz);  $^{13}\text{C}$  NMR (125 MHz,  $\text{CDCl}_3$ ):  $\delta$  201.7, 141.6, 128.6, 127.4, 127.0, 98.4, 91.9, 68.2, 50.4, 20.6; HRMS (ESI): calc. for  $\text{C}_{14}\text{H}_{18}\text{O}_2$   $[\text{M}+\text{Na}]^+$ : 241.1199; found: 241.1205.

((2-(3-methylbuta-1,2-dien-1-yl)-2-phenylpropane-1,3-diyl)bis(oxy))bis(methylene)-dibenzene (**1q**)

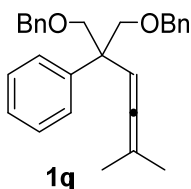

To a suspension of  $\text{NaH}$  (190 mg in 60% oil, 4.67 mmols) in 4 mL DMF, **1p** (300 mg, 1.37 mmols) in 2mL DMF was added dropwise at  $0^\circ\text{C}$  and stirred for 1h at  $0^\circ\text{C}$ .  $\text{BnBr}$  (360  $\mu\text{L}$ , 515mg, 3.01 mmols) was added dropwise at  $0^\circ\text{C}$  and the mixture was stirred overnight at rt. The reaction mixture was quenched with a mixture of 15 mL  $\text{Et}_2\text{O}$  and 5 mL water, extracted with  $\text{Et}_2\text{O}$  (3 x 20 mL) washed with water (25 mL). The combined organic layers were dried over  $\text{MgSO}_4$ . Evaporation and column chromatography on silica gel (petroleum ether/ethyl acetate = 20/1) afforded 497 mg of product **1q** (91% yield) as a colorless oil.  $^1\text{H}$  NMR (500 MHz,  $\text{CDCl}_3$ ):  $\delta$  7.50-7.44 (m, 2H), 7.36-7.20 (m, 13H), 5.33 (h, 1H,  $J = 2.8$  Hz), 4.54 (m, 4H), 3.88 (d, 2H,  $J = 9.1$  Hz), 3.78 (d, 2H,  $J = 9.1$  Hz), 1.69 (d, 6H,  $J = 2.8$  Hz);  $^{13}\text{C}$  NMR (125 MHz,  $\text{CDCl}_3$ ):  $\delta$  201.9, 143.2, 138.8, 128.2, 127.8, 127.7, 127.3, 127.2, 126.3, 97.4, 93.0, 74.0, 73.3, 48.8, 20.4; HRMS (ESI): calc. for  $\text{C}_{28}\text{H}_{30}\text{O}_2$   $[\text{M}+\text{Na}]^+$ : 421.2138; found: 421.2140.

*Diethyl 2-(3-methylpenta-1,2-dien-1-yl)-2-phenylmalonate (1r)*

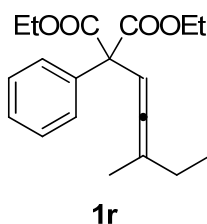

Following the general procedure but using 1-bromo-3-methylpenta-1,2-diene instead of 1-bromo-3-methylbuta-1,2-diene. 62% Isolated yield, colorless oil.  $^1\text{H}$  NMR (500 MHz,  $\text{CDCl}_3$ ):  $\delta$  7.49-7.44 (m, 2H), 7.38-7.27 (m, 3H), 5.91 (h, 1H,  $J = 2.9$  Hz), 4.25 (m, 4H), 1.90 (m, 2H), 1.65 (d, 6H,  $J = 2.9$  Hz), 1.28 (td, 3H,  $J = 7.2$  Hz,  $J = 1.6$  Hz), 0.93 (t, 3H,  $J = 7.4$  Hz);  $^{13}\text{C}$  NMR (125 MHz,  $\text{CDCl}_3$ ):  $\delta$  201.4, 169.9, 169.8, 137.5, 128.5, 127.8, 127.5, 106.0, 92.4, 64.5, 61.7, 26.8, 18.3, 14.0, 12.0; HRMS (ESI): calc. for  $\text{C}_{19}\text{H}_{24}\text{O}_4$   $[\text{M}+\text{Na}]^+$ : 339.1567; found: 339.1581.

*Diethyl 2-(2-cyclohexylidenevinyl)-2-phenylmalonate (1s)*

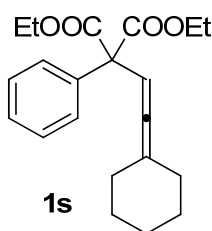

Following the general procedure but using (2-bromovinylidene)cyclohexane instead of 1-bromo-3-methylbuta-1,2-diene. 65% Isolated yield, colorless oil.  $^1\text{H}$  NMR (500 MHz,  $\text{CDCl}_3$ ):  $\delta$  7.46-7.41 (m, 2H), 7.37-7.27 (m, 3H), 5.84 (h, 1H,  $J = 2.9$  Hz), 4.27 (m, 4H), 2.09-2.02 (m, 4H), 1.60-1.32 (m, 6H), 1.28 (t, 6H,  $J = 7.2$  Hz);  $^{13}\text{C}$  NMR (125 MHz,  $\text{CDCl}_3$ ):  $\delta$  199.1, 169.9, 137.6, 128.5, 127.8, 127.5, 106.7, 90.7, 64.7, 61.8, 30.7, 27.0, 25.9, 14.0; HRMS (ESI): calc. for  $\text{C}_{21}\text{H}_{26}\text{O}_4$   $[\text{M}+\text{Na}]^+$ : 365.1723; found: 365.1755.

*Diethyl 2-(3-methylbuta-1,2-dien-1-yl)-2-phenylmalonate- $d_5$  (1a- $d_5$ )*

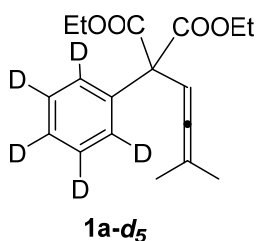

58% Isolated yield, colorless oil.  $^1\text{H}$  NMR (500 MHz,  $\text{CDCl}_3$ ):  $\delta$  5.84 (h, 1H,  $J = 2.8$  Hz), 4.26 (m, 4H), 1.66 (d, 6H,  $J = 2.8$  Hz), 1.29 (t, 6H,  $J = 7.2$  Hz);  $^{13}\text{C}$  NMR (125 MHz,  $\text{CDCl}_3$ ):  $\delta$  202.3, 99.7, 90.6, 64.4, 61.8, 19.8, 14.0; HRMS (ESI): calc. for  $\text{C}_{18}\text{H}_{17}\text{D}_5\text{O}_4$   $[\text{M}+\text{Na}]^+$ : 330.1724; found: 330.1744.

Diethyl 2-(3-methylbuta-1,2-dien-1-yl)-2-phenylmalonate-*d*<sub>6</sub> (**1a-d<sub>6</sub>**)

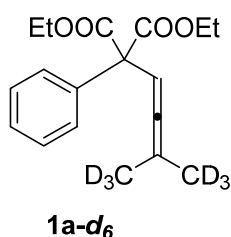

52% Isolated yield, colorless oil. <sup>1</sup>H NMR (500 MHz, CDCl<sub>3</sub>): δ 7.47-7.42 (m, 2H), 7.38-7.28 (m, 3H), 5.83 (s, 1H), 4.26 (m, 4H), 1.29 (t, 6H, *J* = 7.2 Hz); <sup>13</sup>C NMR (125 MHz, CDCl<sub>3</sub>): δ 202.3, 169.9, 137.5, 128.5, 127.9, 127.6, 90.6, 64.5, 61.8, 14.0; HRMS (ESI): calc. for C<sub>18</sub>H<sub>16</sub>D<sub>6</sub>O<sub>4</sub> [M+Na]<sup>+</sup> : 331.1787; found: 331.1801.

**Typical Experimental Procedure for Carbocyclization of 1 to 2.**

In a sealable microwave tube were placed 0.2 mmol of arylallene, 4.5 mg Pd(OAc)<sub>2</sub> (0.02 mmols) and 36.5 mg of benzoquinone (0.34 mmol). The mixture was dissolved in 2 mL of acetic acid and 32 μL DMSO-*d*<sub>6</sub> (0.4 mmols) were added. The mixture was stirred for 16h at 60°C. The resulting mixture was quenched with a 5 mL 1:1 mixture H<sub>2</sub>O:AcOEt and extracted with AcOEt (3 x 3 mL). The combined organic layers were dried over MgSO<sub>4</sub>. Evaporation and column chromatography on silica gel afforded the desired indene product.

**Selected optimization results**

Table S1. Optimization of additives

| Entry <sup>[a]</sup> | Additive         | 2a, Yield [%] | 3a, Yield [%] |
|----------------------|------------------|---------------|---------------|
| 1                    | No Add           | 34            | 18            |
| 2                    | PPh <sub>3</sub> | <5            | -             |
| 3                    | Acridine         | <5            | -             |
| 4                    |                  | <5            | -             |
| 5                    |                  | 60            | 6             |
| 6                    |                  | 43            | 10            |
| 7                    |                  | 33            | 11            |

|   |                                                                                   |    |    |
|---|-----------------------------------------------------------------------------------|----|----|
| 8 | 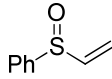 | <5 | -  |
| 9 | 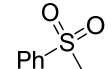 | 17 | 12 |

<sup>[a]</sup> Yields were determined by <sup>1</sup>H NMR using mesitylene as internal standard.

Table S2. Optimization amount of DMSO-d<sub>6</sub>

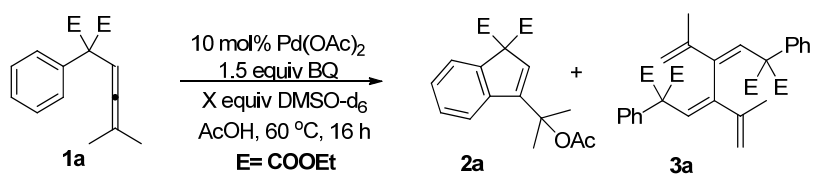

| Entry <sup>[a]</sup> | Equiv. DMSO-d <sub>6</sub> | 2a, Yield [%] | 3a, Yield [%] |
|----------------------|----------------------------|---------------|---------------|
| 1                    | 0                          | 34            | 18            |
| 2                    | 0.5                        | 47            | 10            |
| 3                    | 1                          | 49            | 8             |
| 4                    | 2                          | 60            | 6             |
| 5                    | 3                          | 57            | 6             |
| 6                    | 4                          | 53            | 5             |
| 7                    | 5                          | 52            | <5            |
| 8                    | 10                         | 47            | <5            |
| 9                    | 20                         | 36            | <5            |

<sup>[a]</sup> Yields were determined by <sup>1</sup>H NMR using mesitylene as internal standard.

Table S3. Optimization of oxidants

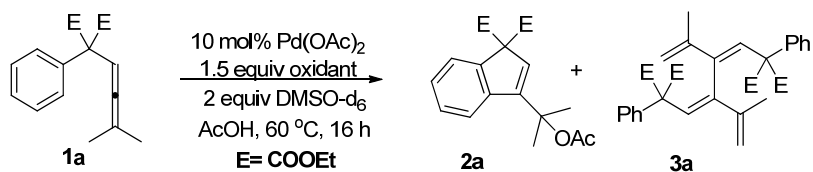

| Entry <sup>[a]</sup> | Oxidant                                                                             | 2a, Yield [%] | 3a, Yield [%] |
|----------------------|-------------------------------------------------------------------------------------|---------------|---------------|
| 1                    | CuCl <sub>2</sub>                                                                   | 0             | -             |
| 2                    | Cu(OAc) <sub>2</sub>                                                                | 0             | -             |
| 3                    | AgOAc                                                                               | 0             | -             |
| 4                    | Ag <sub>2</sub> O                                                                   | 0             | -             |
| 5                    | PhI(OAc) <sub>2</sub>                                                               | 0             | -             |
| 6                    | 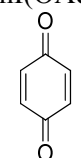 | 60            | 6             |
| 7                    | 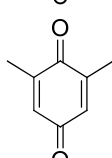 | 25            | 5             |

|    |                                                                                   |    |   |
|----|-----------------------------------------------------------------------------------|----|---|
| 8  | 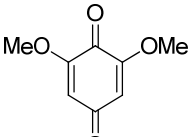 | <5 | - |
| 9  | 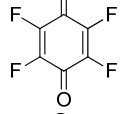 | 0  | - |
| 10 | 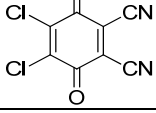 | 0  | - |

<sup>[a]</sup> Yields were determined by <sup>1</sup>H NMR using mesitylene as internal standard.

Table S4. Optimization of the amount of benzoquinone

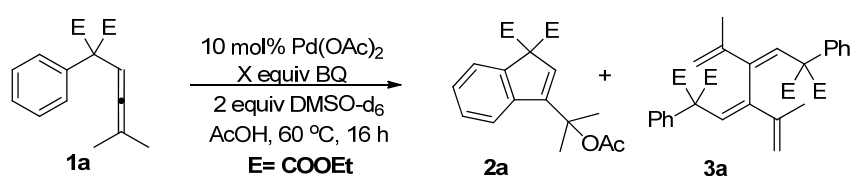

| Entry <sup>[a]</sup> | Equiv. BQ | 2a, Yield [%] | 3a, Yield [%] |
|----------------------|-----------|---------------|---------------|
| 1                    | 1.1       | 49            | 5             |
| 2                    | 1.3       | 56            | 6             |
| 3                    | 1.5       | 60            | 6             |
| 4                    | 1.7       | 65            | 6             |
| 5                    | 2         | 61            | 6             |

<sup>[a]</sup> Yields were determined by <sup>1</sup>H NMR using mesitylene as internal standard.

Table S5. Use of co-solvents

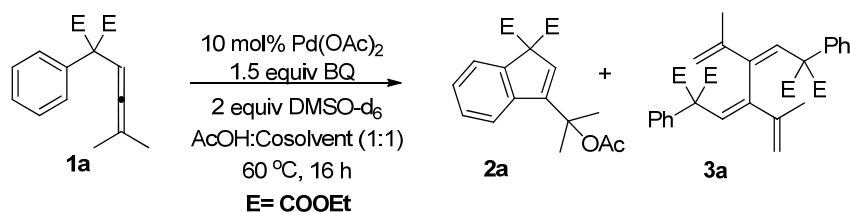

| Entry <sup>[a]</sup> | Cosolvent | 2a, Yield [%] | 3a, Yield [%] |
|----------------------|-----------|---------------|---------------|
| 1                    | -         | 60            | 6             |
| 2                    | THF       | 33            | <5            |
| 3                    | Dioxane   | 37            | <5            |
| 4                    | DCE       | 26            | <5            |
| 5                    | Toluene   | 32            | <5            |
| 6                    | DMF       | 0             | -             |
| 7                    | AcOEt     | 38            | <5            |

<sup>[a]</sup> Yields were determined by <sup>1</sup>H NMR using mesitylene as internal standard.

Table S6. Use of bases

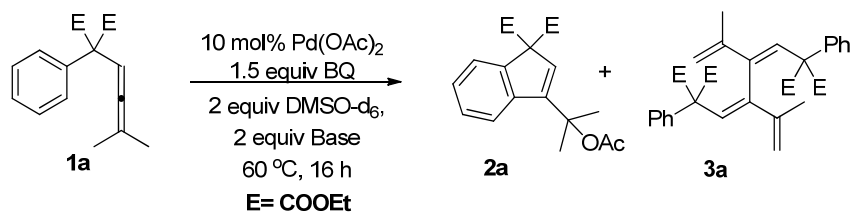

| Entry <sup>[a]</sup> | Base                    | <b>2a</b> , Yield [%] | <b>3a</b> , Yield [%] |
|----------------------|-------------------------|-----------------------|-----------------------|
| 1                    | -                       | 60                    | 6                     |
| 2                    | LiOAc·2H <sub>2</sub> O | 50                    | 8                     |
| 3                    | KOAc                    | 46                    | 9                     |
| 4                    | CsOAc                   | 44                    | 8                     |
| 5                    | PivOLi                  | -                     | -                     |

<sup>[a]</sup> Yields were determined by <sup>1</sup>H NMR using mesitylene as internal standard.

## Characterization of products 2.

### Diethyl 3-(2-acetoxypentan-2-yl)-1H-indene-1,1-dicarboxylate (**2a**)

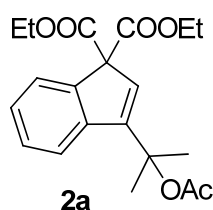

<sup>1</sup>H NMR (500 MHz, CDCl<sub>3</sub>): δ 7.74 (d, 1H, *J* = 7.4 Hz), 7.49 (d, 1H, *J* = 7.8 Hz), 7.39-7.26 (m, 2H), 6.38 (s, 1H), 4.23 (m, 4H), 2.02 (s, 3H), 1.82 (s, 6H), 1.28 (t, 6H, *J* = 7.1 Hz); <sup>13</sup>C NMR (125 MHz, CDCl<sub>3</sub>): δ 169.4, 167.7, 150.9, 142.0, 140.8, 128.5, 126.7, 126.2, 125.9, 121.5, 79.1, 68.8, 62.1, 26.6, 21.9, 14.0; HRMS (ESI): calc. for C<sub>20</sub>H<sub>24</sub>O<sub>6</sub> [M+Na]<sup>+</sup>: 383.1465; found: 383.1477.

### Diethyl 3-(2-acetoxypentan-2-yl)-7-methyl-1H-indene-1,1-dicarboxylate (**2b**)

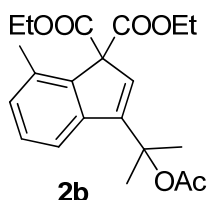

<sup>1</sup>H NMR (500 MHz, CDCl<sub>3</sub>): δ 7.37 (d, 1H, *J* = 7.8 Hz), 7.26 (t, 1H, *J* = 7.8 Hz), 7.08 (d, 1H, *J* = 7.8 Hz), 6.30 (s, 1H), 4.22 (m, 4H), 2.45 (s, 3H), 2.02 (s, 3H), 1.80 (s, 6H), 1.26 (t, 6H, *J* = 7.1 Hz); <sup>13</sup>C NMR (125 MHz, CDCl<sub>3</sub>): δ 169.3, 167.8, 150.6, 142.8,

139.5, 136.2, 129.0, 128.5, 127.5, 119.2, 78.9, 69.2, 61.9, 26.7, 21.8, 19.5, 14.0; HRMS (ESI): calc. for  $C_{21}H_{26}O_6$   $[M+Na]^+$ : 397.1622; found: 397.1634.

*Diethyl 3-(2-acetoxypentan-2-yl)-6-methyl-1H-indene-1,1-dicarboxylate (2c)*

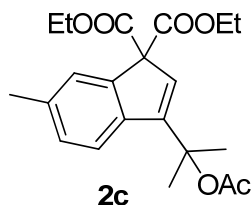

$^1H$  NMR (500 MHz,  $CDCl_3$ ):  $\delta$  7.55 (s, 1H), 7.37 (d, 1H,  $J = 7.8$  Hz), 7.16 (d, 1H,  $J = 7.8$  Hz), 6.30 (s, 1H), 4.23 (m, 4H), 2.42 (s, 3H), 2.01 (s, 3H), 1.80 (s, 6H), 1.29 (t, 6H,  $J = 7.1$  Hz);  $^{13}C$  NMR (125 MHz,  $CDCl_3$ ):  $\delta$  169.4, 167.9, 150.9, 141.0, 139.3, 136.1, 129.2, 126.7, 125.7, 121.1, 79.1, 68.6, 62.1, 26.5, 21.9, 21.5, 14.0; HRMS (ESI): calc. for  $C_{21}H_{26}O_6$   $[M+Na]^+$ : 397.1622; found: 397.1644.

*Diethyl 3-(2-acetoxypentan-2-yl)-5-methyl-1H-indene-1,1-dicarboxylate (2d)*

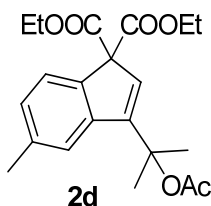

$^1H$  NMR (500 MHz,  $CDCl_3$ ):  $\delta$  7.61 (d, 1H,  $J = 7.8$  Hz), 7.30 (s, 1H), 7.10 (d, 1H,  $J = 7.8$  Hz), 6.36 (s, 1H), 4.23 (m, 4H), 2.41 (s, 3H), 2.03 (s, 3H), 1.82 (s, 6H), 1.28 (t, 6H,  $J = 7.2$  Hz);  $^{13}C$  NMR (125 MHz,  $CDCl_3$ ):  $\delta$  169.4, 167.9, 150.9, 142.1, 138.2, 138.0, 128.7, 127.0, 125.5, 122.3, 79.2, 68.5, 62.1, 26.6, 21.9, 21.8, 14.0; HRMS (ESI): calc. for  $C_{21}H_{26}O_6$   $[M+Na]^+$ : 397.1622; found: 397.1629.

*Diethyl 3-(2-acetoxypentan-2-yl)-4-methoxy-1H-indene-1,1-dicarboxylate (2e)*

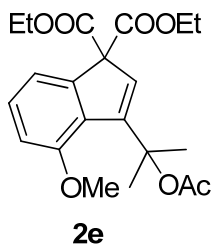

$^1H$  NMR (500 MHz,  $CDCl_3$ ):  $\delta$  7.38 (s, 1H,  $J = 8.5$  Hz), 7.33 (d, 1H,  $J = 2.5$  Hz), 6.88 (dd, 1H,  $J = 8.5$  Hz,  $J = 2.5$  Hz), 6.25 (s, 1H), 4.22 (m, 4H), 3.86 (s, 3H), 2.02 (s, 3H), 1.80 (s, 6H), 1.29 (t, 6H,  $J = 7.1$  Hz);  $^{13}C$  NMR (125 MHz,  $CDCl_3$ ):  $\delta$  169.4, 167.8, 158.5, 150.7, 142.6, 134.8, 124.7, 121.9, 114.0, 112.3, 79.1, 68.7, 62.1, 55.6, 26.6, 21.9, 14.0; HRMS (ESI): calc. for  $C_{21}H_{26}O_7$   $[M+Na]^+$ : 413.1571; found: 413.1585.

*Diethyl 3-(2-acetoxypentan-2-yl)-5-methoxy-1H-indene-1,1-dicarboxylate (2f)*

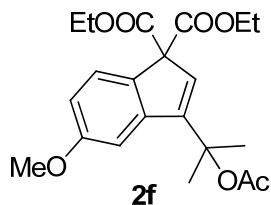

$^1\text{H}$  NMR (500 MHz,  $\text{CDCl}_3$ ):  $\delta$  7.62 (s, 1H), 7.05 (d, 1H,  $J = 2.4$  Hz), 6.81 (d, 1H,  $J = 8.6$  Hz,  $J = 2.4$  Hz), 6.39 (s, 1H), 4.23 (m, 4H), 3.85 (s, 3H), 2.03 (s, 3H), 1.80 (s, 6H), 1.28 (t, 6H,  $J = 7.1$  Hz);  $^{13}\text{C}$  NMR (125 MHz,  $\text{CDCl}_3$ ):  $\delta$  169.3, 167.9, 160.2, 150.7, 143.4, 132.9, 127.9, 126.3, 110.8, 108.4, 79.0, 68.1, 62.0, 55.5, 26.6, 21.9, 14.0; HRMS (ESI): calc. for  $\text{C}_{21}\text{H}_{26}\text{O}_7$   $[\text{M}+\text{Na}]^+$ : 413.1571 found: 413.1546.

*Diethyl 3-(2-acetoxypentan-2-yl)-4,5,6-trimethoxy-1H-indene-1,1-dicarboxylate (2g)*

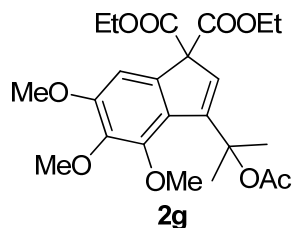

$^1\text{H}$  NMR (500 MHz,  $\text{CDCl}_3$ ):  $\delta$  7.11 (s, 1H), 6.29 (s, 1H), 4.25 (m, 4H), 3.98 (s, 3H), 3.91 (s, 3H), 3.85 (s, 3H), 2.05 (s, 3H), 1.85 (s, 6H), 1.28 (t, 6H,  $J = 7.1$  Hz);  $^{13}\text{C}$  NMR (125 MHz,  $\text{CDCl}_3$ ):  $\delta$  169.8, 167.9, 152.8, 151.4, 147.3, 142.7, 137.1, 126.7, 125.4, 105.8, 79.6, 38.0, 62.1, 60.5, 56.3, 26.3, 22.5, 14.0; HRMS (ESI): calc. for  $\text{C}_{23}\text{H}_{30}\text{O}_9$   $[\text{M}+\text{Na}]^+$ : 473.1782; found: 473.1807.

*Diethyl 3-(2-acetoxypentan-2-yl)-5-fluoro-1H-indene-1,1-dicarboxylate (2h)*

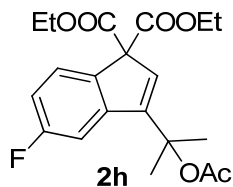

$^1\text{H}$  NMR (500 MHz,  $\text{CDCl}_3$ ):  $\delta$  8.67 (dd, 1H,  $J = 8.4$  Hz,  $J = 5.5$  Hz), 7.17 (dd, 1H,  $J = 9.0$  Hz,  $J = 2.5$  Hz), 7.00-6.94 (m, 1H), 6.44 (s, 1H), 4.23 (m, 4H), 2.04 (s, 3H), 1.80 (s, 6H), 1.28 (t, 6H,  $J = 7.1$  Hz);  $^{13}\text{C}$  NMR (125 MHz,  $\text{CDCl}_3$ ):  $\delta$  169.4, 167.3, 150.3, 143.9, 136.2, 128.6, 126.9, 113.0, 112.7, 109.1, 108.9, 78.8, 68.3, 62.3, 26.5, 21.8, 13.9; HRMS (ESI): calc. for  $\text{C}_{20}\text{H}_{23}\text{FO}_6$   $[\text{M}+\text{Na}]^+$ : 401.1371; found: 401.1366.

*Diethyl 3-(2-acetoxypentan-2-yl)-6-(trifluoromethyl)-1H-indene-1,1-dicarboxylate (2i)*

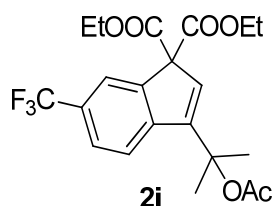

$^1\text{H}$  NMR (500 MHz,  $\text{CDCl}_3$ ):  $\delta$  7.99 (s, 1H), 7.66-7.56 (m, 2H), 6.52 (s, 1H), 4.25 (m, 4H), 2.03 (s, 3H), 1.81 (s, 6H), 1.30 (t, 6H,  $J = 7.1$  Hz);  $^{13}\text{C}$  NMR (125 MHz,  $\text{CDCl}_3$ ):  $\delta$  169.3, 166.8, 150.3, 145.4, 141.3, 129.3, 128.2, 125.9, 122.9, 121.5, 78.7, 68.9, 62.5, 26.6, 21.8, 13.9; HRMS (ESI): calc. for  $\text{C}_{21}\text{H}_{23}\text{F}_3\text{O}_6$   $[\text{M}+\text{Na}]^+$ : 451.1339; found: 451.1379.

*Diethyl 3-(2-acetoxypentan-2-yl)-5-(trifluoromethyl)-1H-indene-1,1-dicarboxylate (2j)*

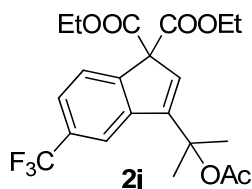

$^1\text{H}$  NMR (500 MHz,  $\text{CDCl}_3$ ):  $\delta$  7.85 (d, 1H,  $J = 8.1$  Hz), 7.72 (s, 1H), 7.57 (d, 1H,  $J = 8.4$  Hz), 6.48 (s, 1H), 4.25 (m, 4H), 2.02 (s, 3H), 1.82 (s, 6H), 1.29 (t, 6H,  $J = 7.1$  Hz);  $^{13}\text{C}$  NMR (125 MHz,  $\text{CDCl}_3$ ):  $\delta$  169.4, 166.8, 150.2, 144.2, 142.7, 130.8, 128.3, 126.2, 125.6, 123.3, 122.9, 118.2, 78.8, 69.0, 62.5, 26.7, 21.6, 14.0; HRMS (ESI): calc. for  $\text{C}_{21}\text{H}_{23}\text{F}_3\text{O}_6$   $[\text{M}+\text{Na}]^+$ : 451.1339; found: 451.1364.

*1,1-Diethyl 7-methyl 3-(2-acetoxypentan-2-yl)-1H-indene-1,1,7-tricarboxylate (2k)*

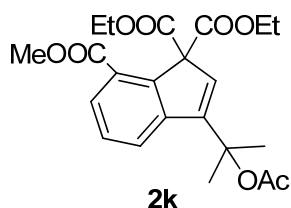

$^1\text{H}$  NMR (500 MHz,  $\text{CDCl}_3$ ):  $\delta$  7.85 (d, 1H,  $J = 7.9$  Hz), 7.71 (dd, 1H,  $J = 7.9$  Hz,  $J = 1.1$  Hz), 7.45 (t, 1H,  $J = 7.9$  Hz), 6.39 (s, 1H), 4.16 (m, 4H), 3.85 (s, 1H), 2.02 (s, 3H), 1.80 (s, 6H), 1.18 (t, 6H,  $J = 7.1$  Hz);  $^{13}\text{C}$  NMR (125 MHz,  $\text{CDCl}_3$ ):  $\delta$  169.2, 167.3, 166.7, 149.4, 143.8, 142.7, 128.5, 128.4, 128.3, 127.5, 125.3, 78.7, 69.7, 61.8, 51.7, 26.6, 21.8, 13.9; HRMS (ESI): calc. for  $\text{C}_{22}\text{H}_{26}\text{O}_8$   $[\text{M}+\text{Na}]^+$ : 441.1520; found: 441.1528.

*1,1-Diethyl 7-methyl 3-(2-acetoxypentan-2-yl)-1H-indene-1,1,6-tricarboxylate (2l)*

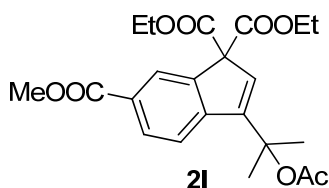

$^1\text{H}$  NMR (500 MHz,  $\text{CDCl}_3$ ):  $\delta$  8.38 (d, 1H,  $J = 1.4$  Hz), 8.08 (dd, 1H,  $J = 8.4$  Hz,  $J = 1.4$  Hz), 7.56 (d, 1H,  $J = 8.4$  Hz), 6.52 (s, 1H), 4.25 (m, 4H), 3.94 (s, 1H), 2.02 (s, 3H), 1.81 (s, 6H), 1.29 (t, 6H,  $J = 7.1$  Hz);  $^{13}\text{C}$  NMR (125 MHz,  $\text{CDCl}_3$ ):  $\delta$  169.3, 167.0, 166.9, 150.6, 146.6, 141.0, 130.5, 129.7, 128.1, 126.8, 121.2, 78.8, 68.8, 62.4, 52.1, 26.6, 21.8, 14.0; HRMS (ESI): calc. for  $\text{C}_{22}\text{H}_{26}\text{O}_8$   $[\text{M}+\text{Na}]^+$ : 441.1520; found: 441.1536.

*1,1-Diethyl 7-methyl 3-(2-acetoxypentan-2-yl)-1H-indene-1,1,5-tricarboxylate (2m)*

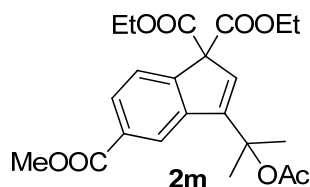

$^1\text{H}$  NMR (500 MHz,  $\text{CDCl}_3$ ):  $\delta$  8.16 (s, 1H), 8.00 (d, 1H,  $J = 8.0$  Hz), 7.80 (d, 1H,  $J = 8.0$  Hz), 6.43 (s, 1H), 4.24 (m, 4H), 3.95 (s, 1H), 2.05 (s, 3H), 1.83 (s, 6H), 1.28 (t, 6H,  $J = 7.1$  Hz);  $^{13}\text{C}$  NMR (125 MHz,  $\text{CDCl}_3$ ):  $\delta$  169.5, 167.1, 167.0, 150.6, 145.4, 142.4, 130.6, 127.9, 127.6, 125.8, 122.5, 78.9, 69.0, 62.4, 52.2, 26.7, 21.8, 13.9; HRMS (ESI): calc. for  $\text{C}_{22}\text{H}_{26}\text{O}_8$   $[\text{M}+\text{Na}]^+$ : 441.1520; found: 441.1539.

*Diethyl 3-(2-acetoxypentan-2-yl)-1H-cyclopenta[b]naphthalene-1,1-dicarboxylate (2n)*

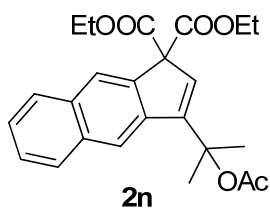

$^1\text{H}$  NMR (500 MHz,  $\text{CDCl}_3$ ):  $\delta$  8.16 (s, 1H), 7.92-7.81 (m, 3H), 7.53-7.45 (m, 2H), 6.47 (s, 1H), 4.26 (m, 4H), 2.05 (s, 3H), 1.88 (s, 6H), 1.30 (t, 6H,  $J = 7.1$  Hz);  $^{13}\text{C}$  NMR (125 MHz,  $\text{CDCl}_3$ ):  $\delta$  169.3, 167.9, 160.2, 150.7, 143.4, 132.9, 127.9, 126.3, 110.8, 108.4, 79.0, 68.1, 62.0, 55.5, 26.6, 21.9, 14.0; HRMS (ESI): calc. for  $\text{C}_{24}\text{H}_{26}\text{O}_6$   $[\text{M}+\text{Na}]^+$ : 433.1622; found: 433.1634.

2-(1,1-bis((benzyloxy)methyl)-1H-inden-3-yl)propan-2-yl acetate (**2q**)

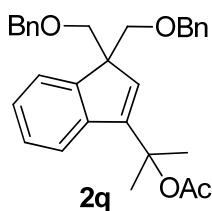

$^1\text{H}$  NMR (500 MHz,  $\text{CDCl}_3$ ):  $\delta$  7.59 (d, 1H,  $J = 7.6$  Hz), 7.51 (d, 1H,  $J = 7.6$  Hz), 7.38-7.26 (m, 11H), 7.17 (t, 1H,  $J = 7.6$  Hz), 6.35 (s, 1H), 4.56 (m, 4H), 3.69 (d, 1H,  $J = 8.7$  Hz), 3.64 (d, 1H,  $J = 8.7$  Hz), 2.02 (s, 3H), 1.78 (s, 6H);  $^{13}\text{C}$  NMR (125 MHz,  $\text{CDCl}_3$ ):  $\delta$  169.6, 148.1, 142.0, 138.8, 132.6, 128.3, 127.4, 127.3, 127.2, 125.0, 124.6, 121.3, 79.6, 73.4, 71.1, 57.1, 26.9, 22.0; HRMS (ESI): calc. for  $\text{C}_{30}\text{H}_{32}\text{O}_4$   $[\text{M}+\text{Na}]^+$ : 479.2193; found: 479.2221.

Diethyl 3-(2-acetoxybutan-2-yl)-1H-indene-1,1-dicarboxylate (**2r**)

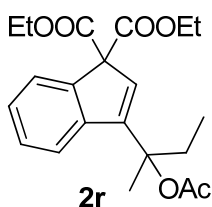

$^1\text{H}$  NMR (500 MHz,  $\text{CDCl}_3$ ):  $\delta$  7.73 (d, 1H,  $J = 7.4$  Hz), 7.49 (d, 1H,  $J = 7.8$  Hz), 7.37-7.25 (m, 2H), 6.37 (s, 1H), 4.22 (m, 4H), 2.25-2.07 (m, 2H), 2.05 (s, 3H), 1.83 (s, 3H), 1.31-1.14 (m, 6H), 0.87 (t, 3H,  $J = 7.5$  Hz);  $^{13}\text{C}$  NMR (125 MHz,  $\text{CDCl}_3$ ):  $\delta$  169.3, 168.0, 167.6, 149.7, 142.0, 140.8, 128.4, 128.0, 126.2, 125.8, 121.5, 82.4, 68.8, 62.1, 31.4, 22.7, 21.9, 14.0, 8.0; HRMS (ESI): calc. for  $\text{C}_{21}\text{H}_{26}\text{O}_6$   $[\text{M}+\text{Na}]^+$ : 397.1622; found: 397.1611.

Diethyl 3-(1-acetoxycyclohexyl)-1H-indene-1,1-dicarboxylate (**2s**)

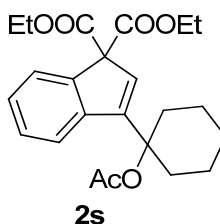

$^1\text{H}$  NMR (500 MHz,  $\text{CDCl}_3$ ):  $\delta$  7.73 (d, 1H,  $J = 7.4$  Hz), 7.52 (d, 1H,  $J = 7.9$  Hz), 7.36-7.23 (m, 2H), 6.38 (s, 1H), 4.22 (m, 4H), 2.70-2.55 (m, 2H), 2.04 (s, 3H), 1.81-1.64 (m, 8H), 1.28 (t, 3H,  $J = 7.2$  Hz);  $^{13}\text{C}$  NMR (125 MHz,  $\text{CDCl}_3$ ):  $\delta$  169.1, 167.8, 150.7, 142.2, 140.7, 128.3, 127.0, 126.1, 125.9, 121.4, 80.1, 69.0, 62.1, 34.5, 25.5, 21.6, 14.0; HRMS (ESI): calc. for  $\text{C}_{23}\text{H}_{28}\text{O}_6$   $[\text{M}+\text{Na}]^+$ : 423.1756; found: 423.1778.

*Diethyl 3-(2-acetoxypentan-2-yl)-1H-indene-1,1-dicarboxylate-d<sub>3</sub> (2a-d<sub>3</sub>)*

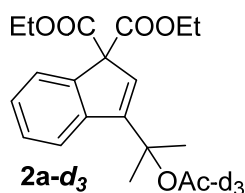

<sup>1</sup>H NMR (500 MHz, CDCl<sub>3</sub>): δ 7.74 (d, 1H, *J* = 7.4 Hz), 7.49 (d, 1H, *J* = 7.8 Hz), 7.39-7.26 (m, 2H), 6.38 (s, 1H), 4.23 (m, 4H), 1.82 (s, 6H), 1.29 (t, 6H, *J* = 7.1 Hz); <sup>13</sup>C NMR (125 MHz, CDCl<sub>3</sub>): δ 169.5, 167.7, 151.0, 142.0, 140.8, 128.5, 126.7, 126.2, 125.9, 121.5, 79.1, 68.8, 62.1, 26.6, 21.6, 14.0; HRMS (ESI): calc. for C<sub>20</sub>H<sub>21</sub>D<sub>3</sub>O<sub>6</sub> [M+Na]<sup>+</sup>: 386.1653; found: 386.1637.

*Diethyl 3-(2-acetoxypentan-2-yl)-1H-indene-1,1-dicarboxylate-d<sub>7</sub> (2a-d<sub>7</sub>)*

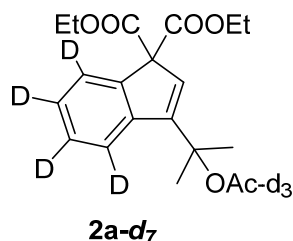

<sup>1</sup>H NMR (500 MHz, CDCl<sub>3</sub>): δ 6.38 (s, 1H), 4.23 (m, 4H), 1.82 (s, 6H), 1.29 (t, 6H, *J* = 7.1 Hz); <sup>13</sup>C NMR (125 MHz, CDCl<sub>3</sub>): δ 167.9, 151.0, 162.7, 79.1, 68.8, 62.1, 26.6, 14.0; HRMS (ESI): calc. for C<sub>20</sub>H<sub>17</sub>D<sub>7</sub>O<sub>6</sub> [M+Na]<sup>+</sup>: 390.1904; found: 390.1888.

*Diethyl 3-(2-acetoxypentan-2-yl)-1H-indene-1,1-dicarboxylate-d<sub>9</sub> (2a-d<sub>9</sub>)*

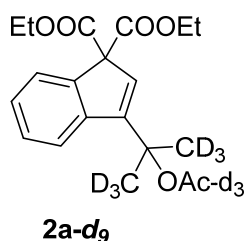

<sup>1</sup>H NMR (500 MHz, CDCl<sub>3</sub>): δ 7.74 (d, 1H, *J* = 7.4 Hz), 7.49 (d, 1H, *J* = 7.8 Hz), 7.39-7.26 (m, 2H), 6.38 (s, 1H), 4.23 (m, 4H), 1.29 (t, 6H, *J* = 7.1 Hz); <sup>13</sup>C NMR (125 MHz, CDCl<sub>3</sub>): δ 169.4, 167.7, 150.9, 142.0, 140.8, 128.5, 126.7, 126.2, 125.9, 121.5, 78.8, 68.8, 62.1, 29.7, 14.0; HRMS (ESI): calc. for C<sub>20</sub>H<sub>15</sub>D<sub>9</sub>O<sub>6</sub> [M+Na]<sup>+</sup>: 392.2030; found: 392.2050.

## Characterization of side product

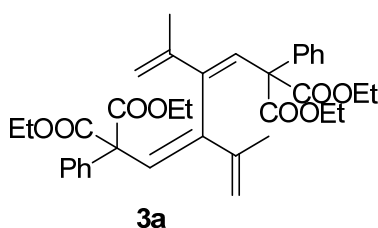

Dimer **3a** was formed during the reaction and was isolated and fully characterized by  $^1\text{H}$  and  $^{13}\text{C}$  NMR and HRMS.  $^1\text{H}$  NMR (500 MHz,  $\text{CDCl}_3$ ):  $\delta$  7.62 (m, 4H), 7.39-7.26 (m, 6H), 6.52 (s, 2H), 4.93 (s, 2H), 4.67 (s, 2H), 4.20 (m, 8H), 2.70 (s, 6H), 1.26 (t, 12H,  $J = 7.2$  Hz);  $^{13}\text{C}$  NMR (125 MHz,  $\text{CDCl}_3$ ):  $\delta$  169.6, 145.8, 140.4, 137.9, 128.0, 127.7, 126.6, 118.1, 63.8, 61.8, 21.6, 13.9; HRMS (ESI): calc. for  $\text{C}_{36}\text{H}_{42}\text{O}_8$   $[\text{M}+\text{Na}]^+$ : 625.2772; found: 625.2738.

The formation of the dimer could be explained by the following pathway (Scheme S1):

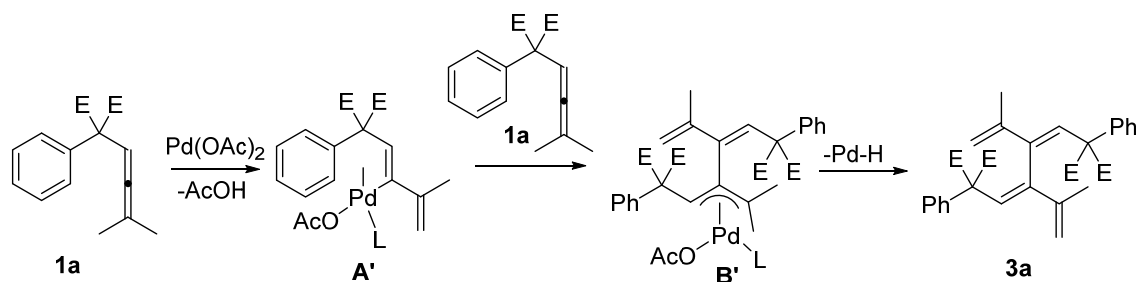

**Scheme S1.** Mechanism for formation of dimer **3a**.

The reaction starts with a C-H activation of the allene moiety to form the Pd-vinyl complex **A'**. Insertion into the allene moiety of a new aryl-allene molecule leads to the formation of the ( $\pi$ -allyl)palladium species **B'**. Final  $\beta$ -hydride elimination releases a Pd-H species (which is reoxidized by BQ) under the formation of dimer **3a**.

## Kinetic Experiments

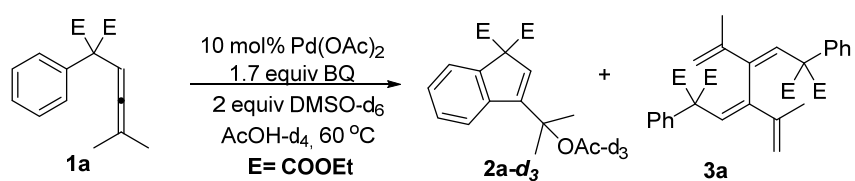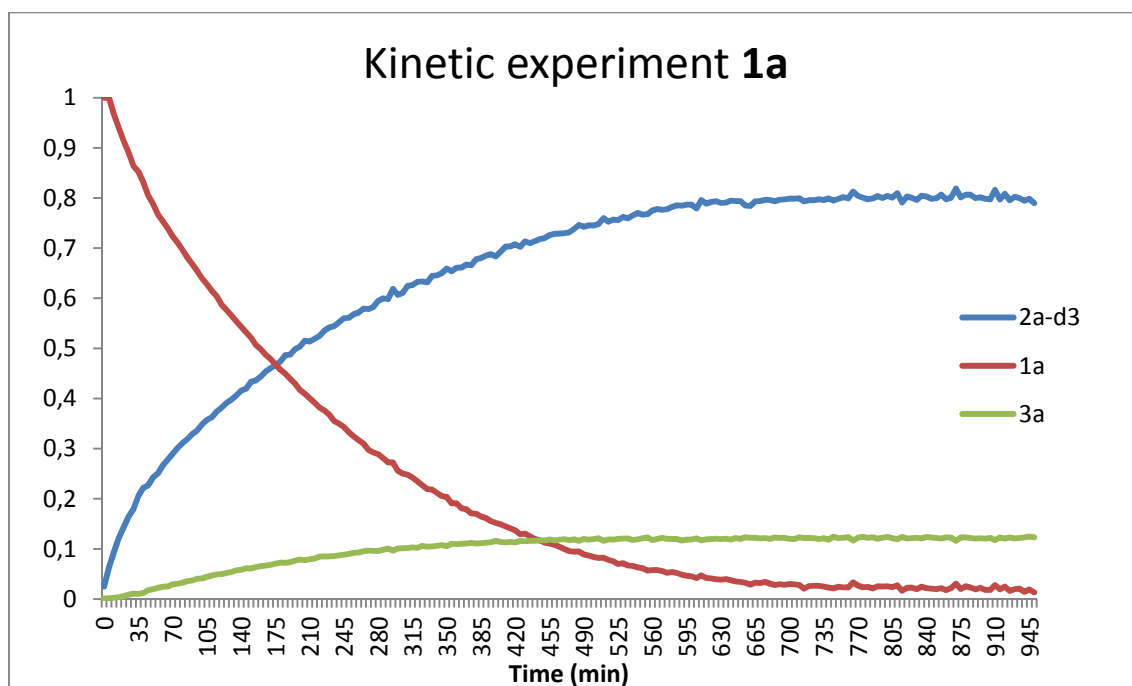

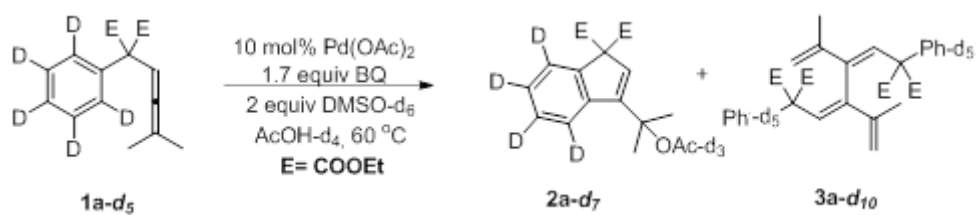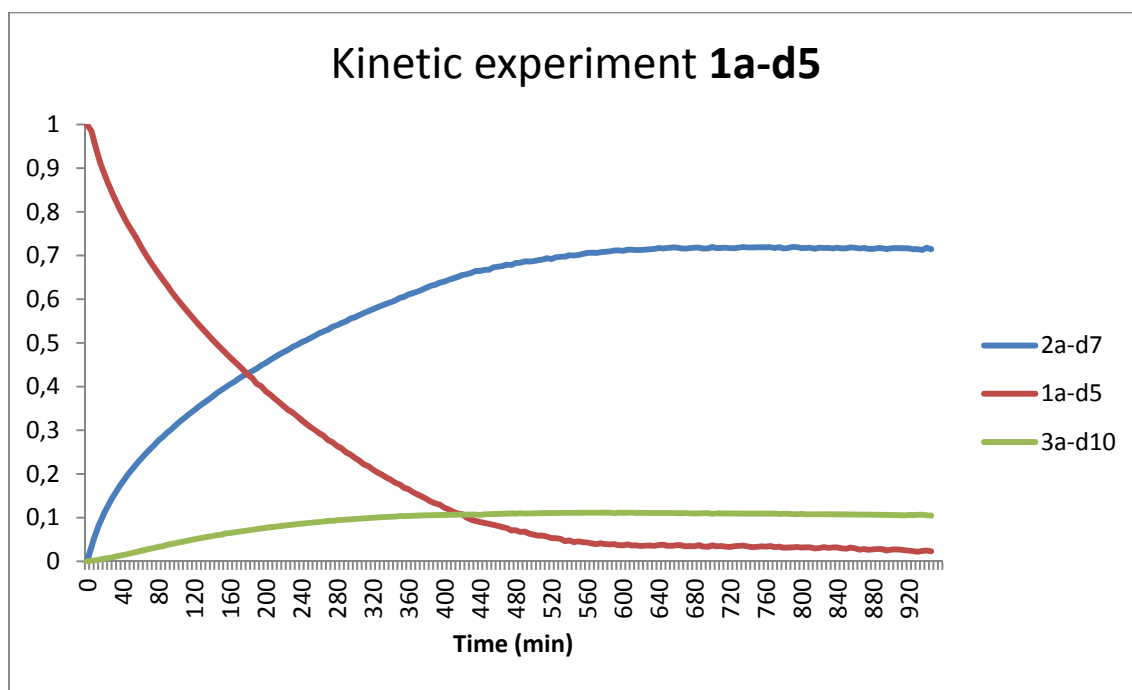

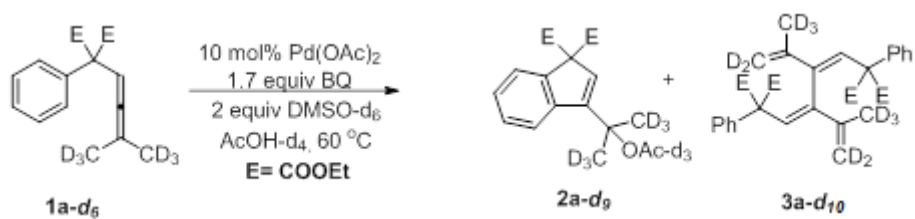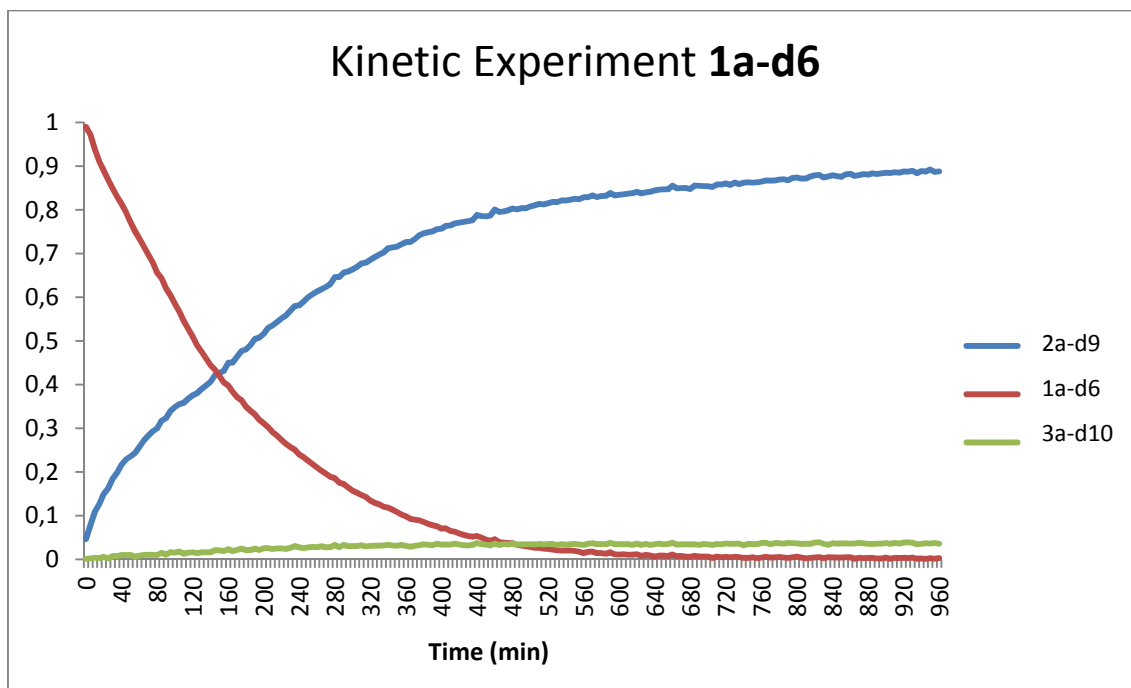

## Calculations Kinetic Isotopic Effect (KIE)

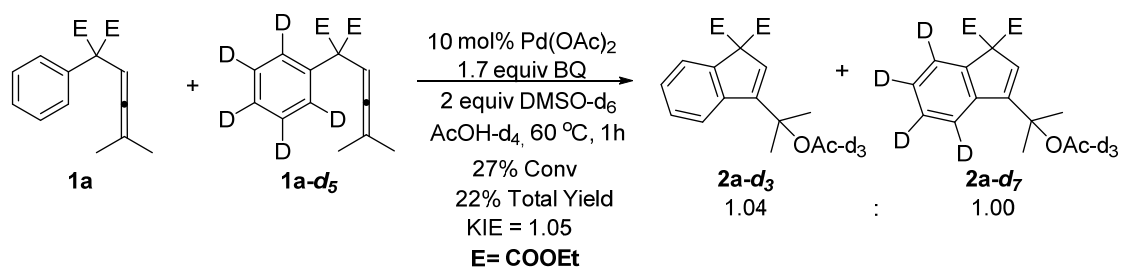

The kinetic isotopic effect value was calculated from the conversion (c = 27%) and the excess of **2a-d<sub>3</sub>** ( $e_{2a-d_3} = ([2a-d_3] - [2a-d_7]) / ([2a-d_3] + [2a-d_7])$ ) using the equation  $k_H/k_D = \ln(1 - (c(1 + e_{2a-d_3}))) / \ln(1 - (c(1 - e_{2a-d_3})))$ , which gave a value of 1.05.

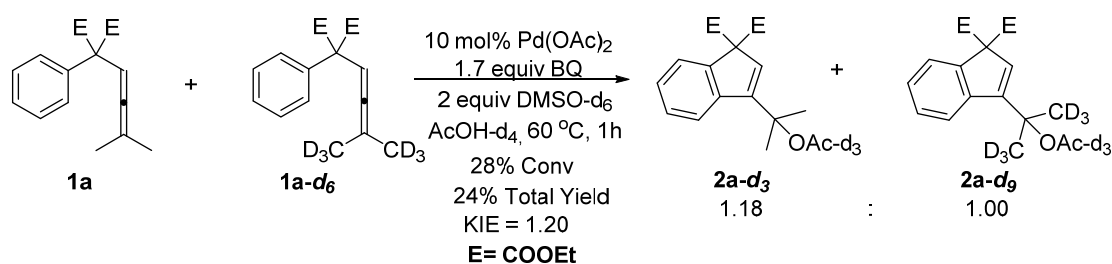

The kinetic isotopic effect value was calculated from the conversion (c = 28%) and the excess of **2a-d<sub>3</sub>** ( $e_{2a-d_3} = ([2a-d_3] - [2a-d_9]) / ([2a-d_3] + [2a-d_9])$ ) using the equation  $k_H/k_D = \ln(1 - (c(1 + e_{2a-d_3}))) / \ln(1 - (c(1 - e_{2a-d_3})))$ , which gave a value of 1.20.

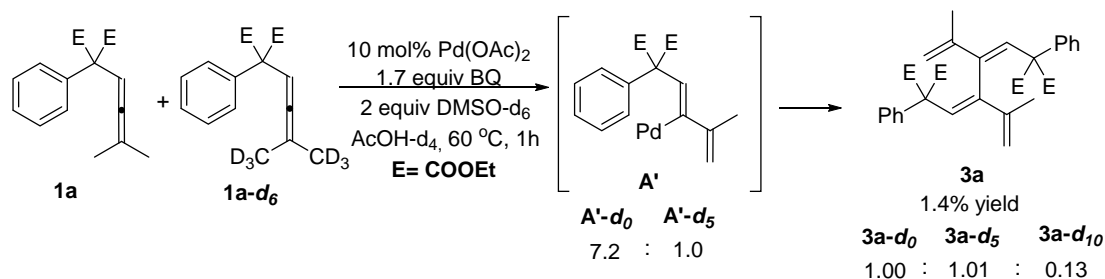

The ratio of the formation of products **3a-d<sub>0</sub>** vs **3a-d<sub>5</sub>** vs **3a-d<sub>10</sub>** was determined by HRMS. It was assumed that formation of **A'** is irreversible and that once the intermediates **A'-d<sub>0</sub>** or **A'-d<sub>5</sub>** were formed, they react with the same rate with either **1a** or **1a-d<sub>6</sub>** (see mechanism in Scheme S1 on p. S24). According to this assumption the KIE was calculated to  $k_H/k_D = 7.2$  ( $k_H/k_D = ([3a-d_0] + [3a-d_5] - [3a-d_{10}]) / 2[3a-d_{10}]$ ).

**Carbocyclization using  $[D_6]$ -Diethyl 2-(3-methylbuta-1,2-dien-1-yl)-2-phenyl-malonate (**1a-d<sub>6</sub>**)**

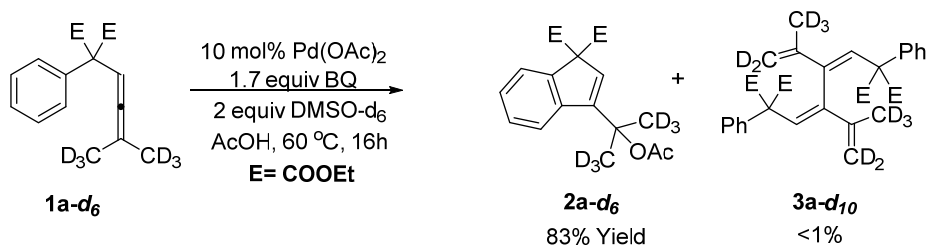

**References**

- <sup>1</sup>Landor, S. R.; Patel, A. N.; Whiter, P. F.; Greaves, P. M. *J. Chem. Soc. (C)* **1966**, 1223.
- <sup>2</sup>Yip, S.F.; Cheung, H.Y.; Zhou, Z.; Kwong, F. Y. *Org. Lett.* **2007**, 17, 3469.

# NMR Spectra

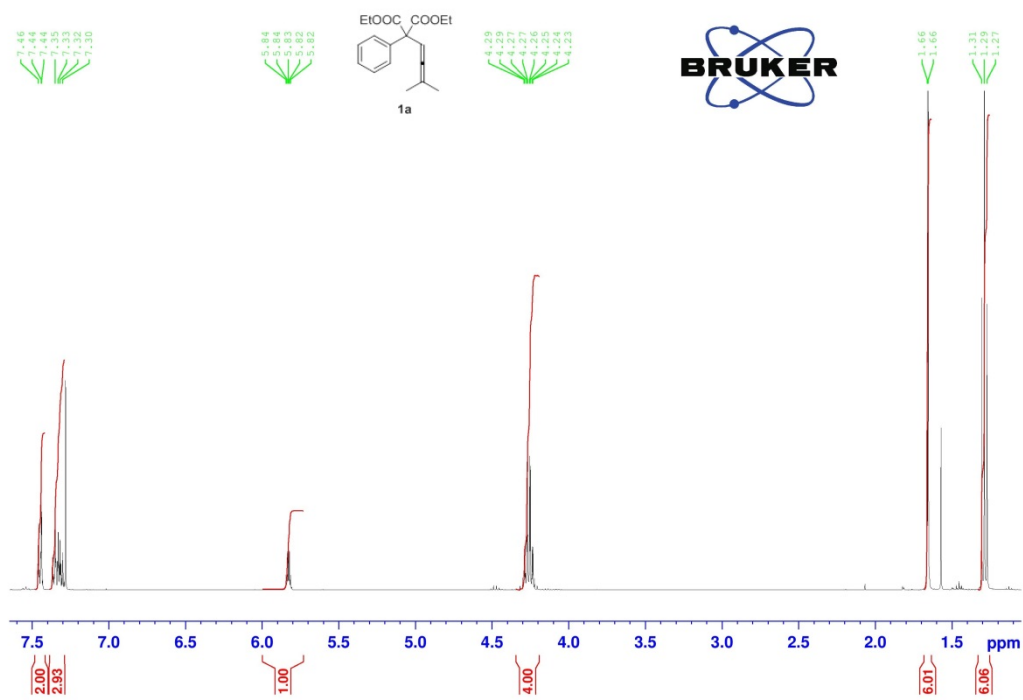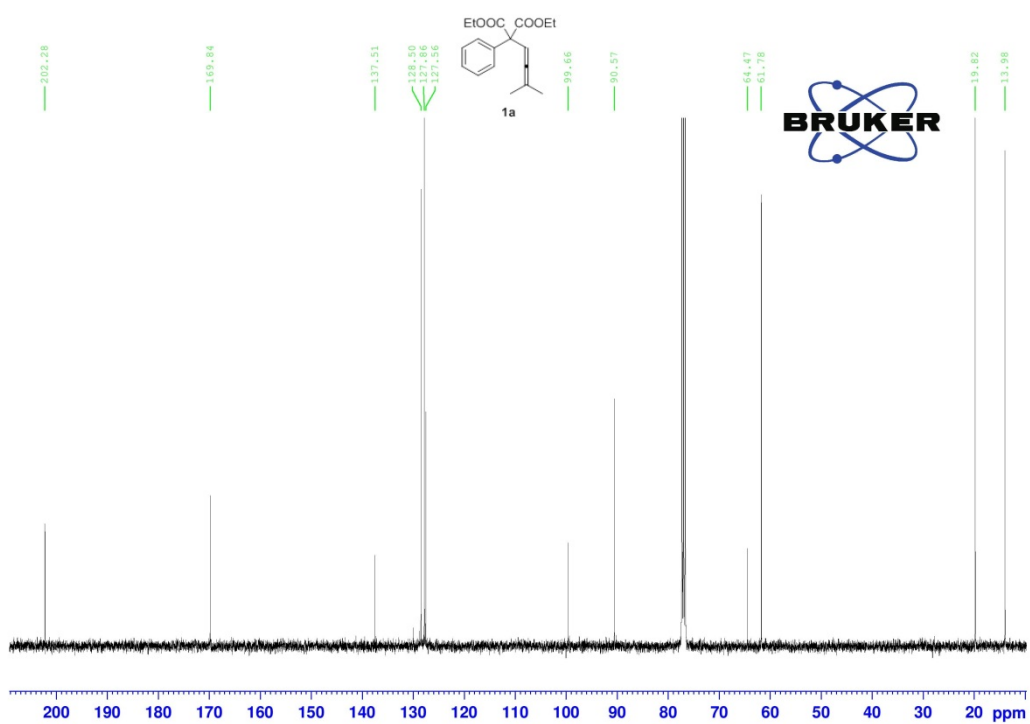

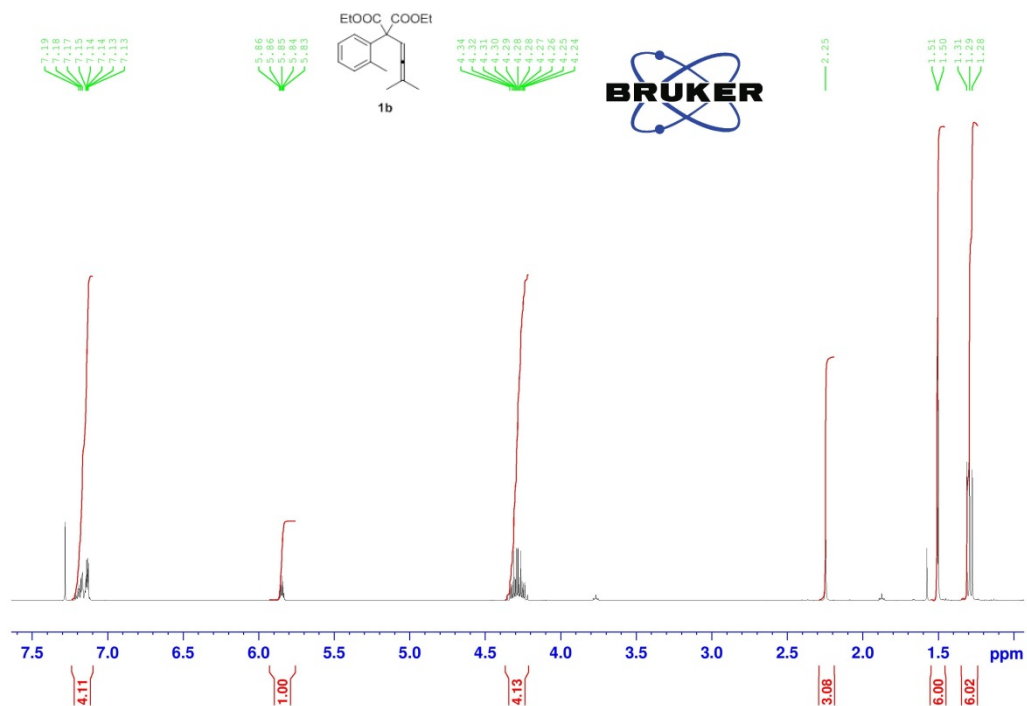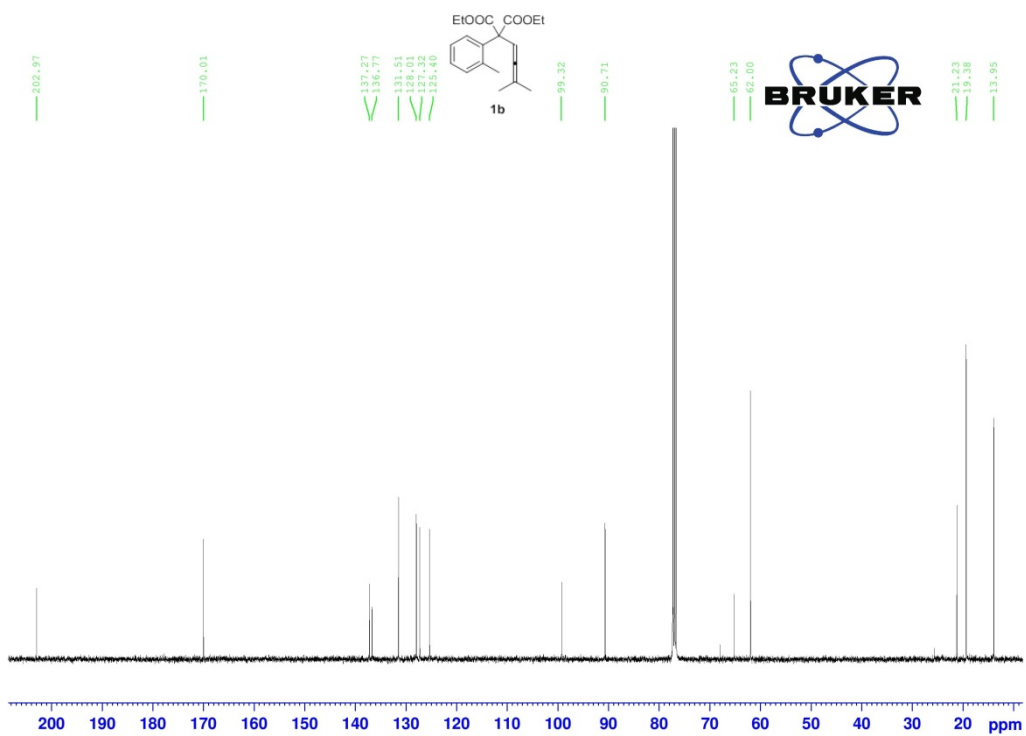

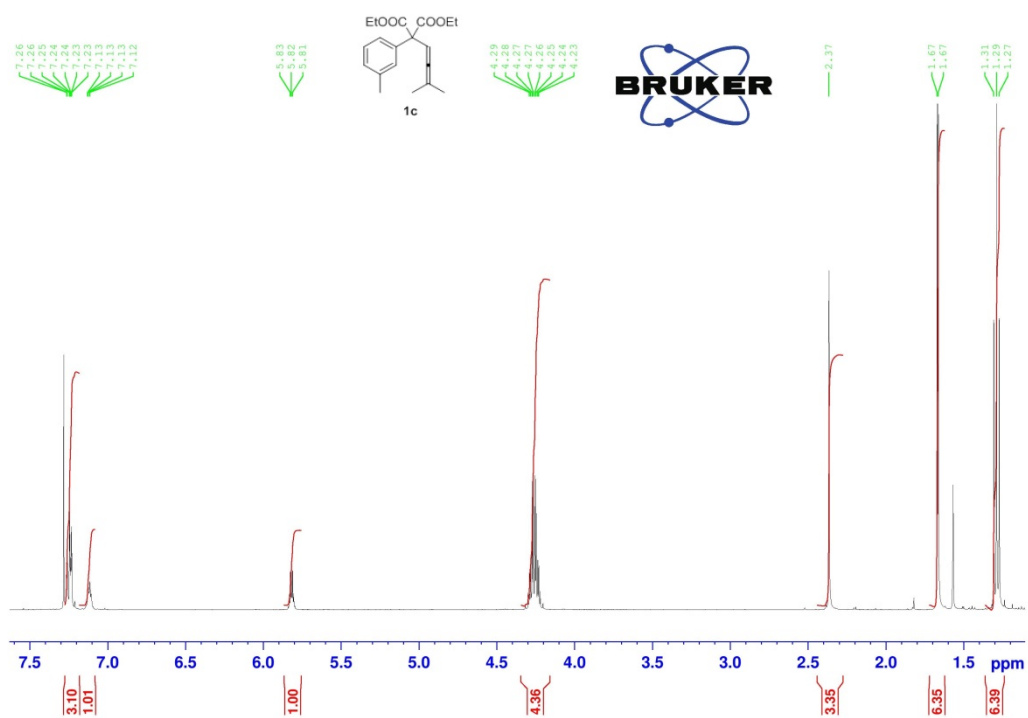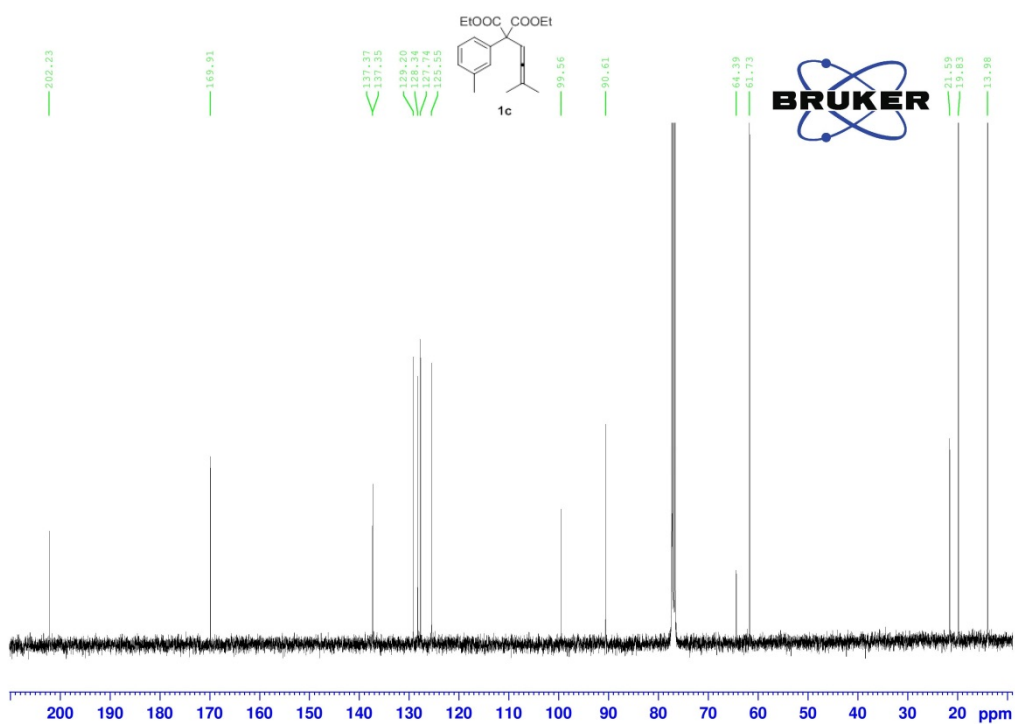

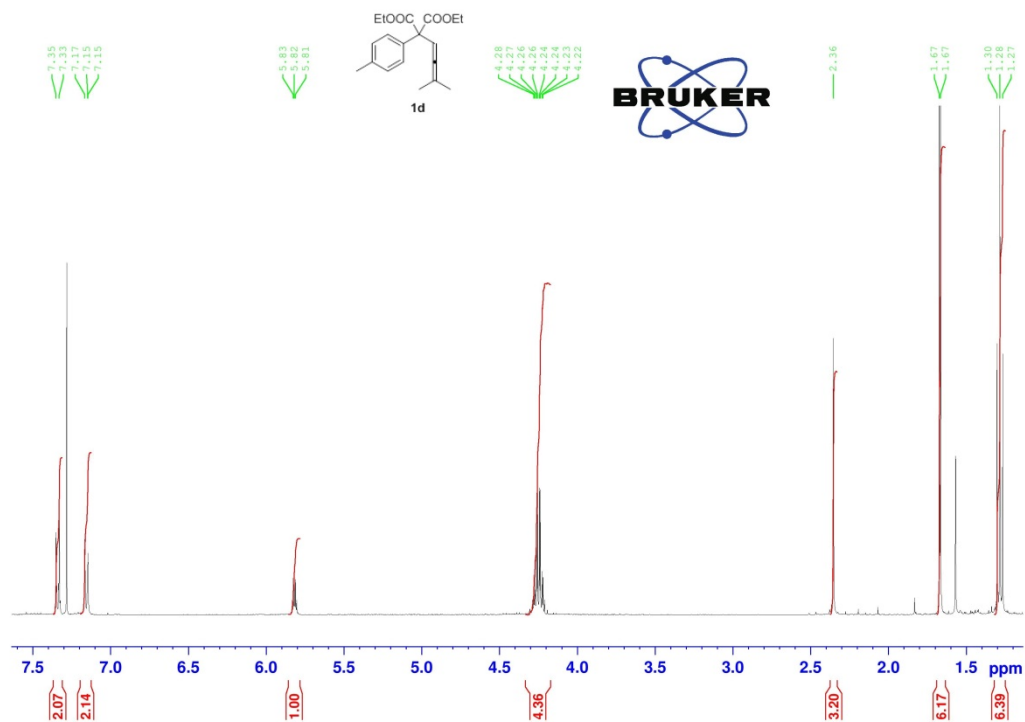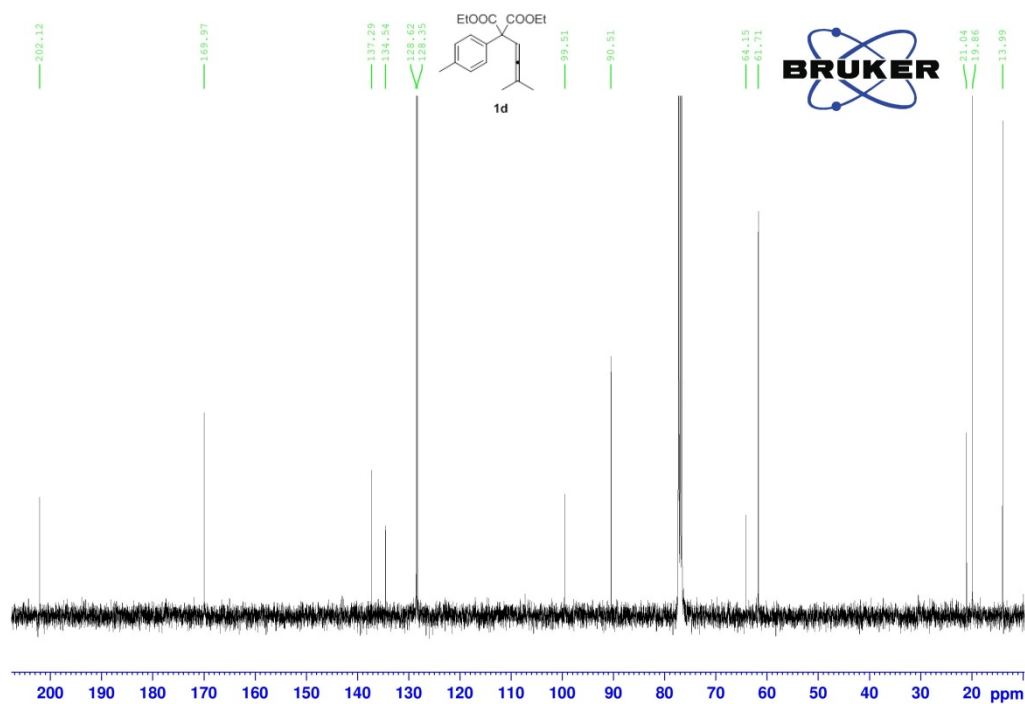

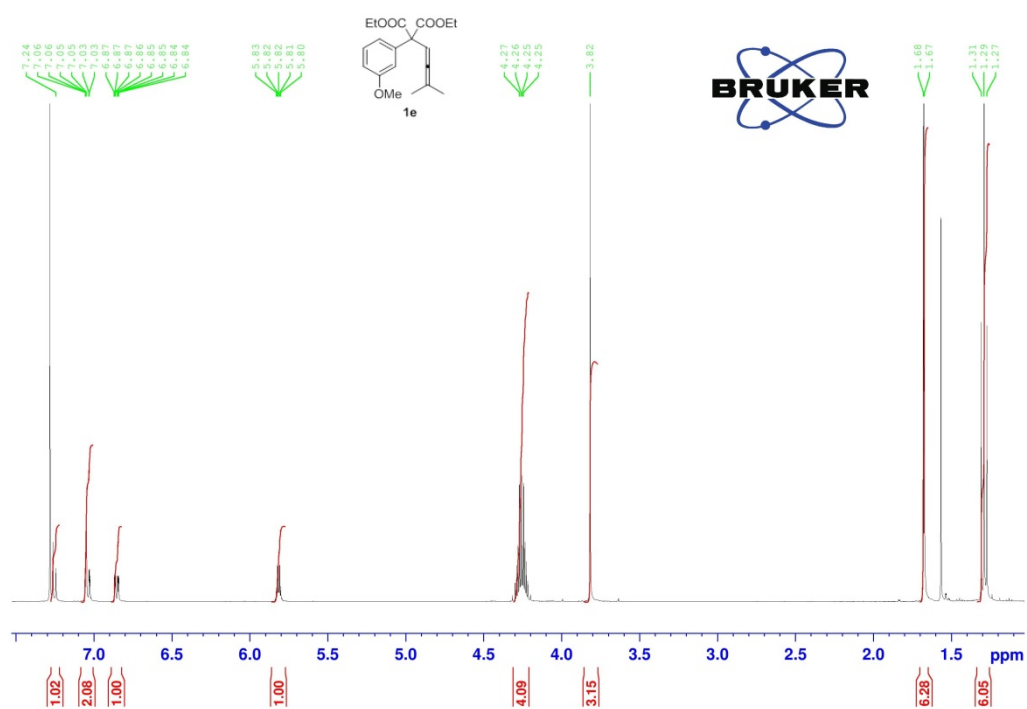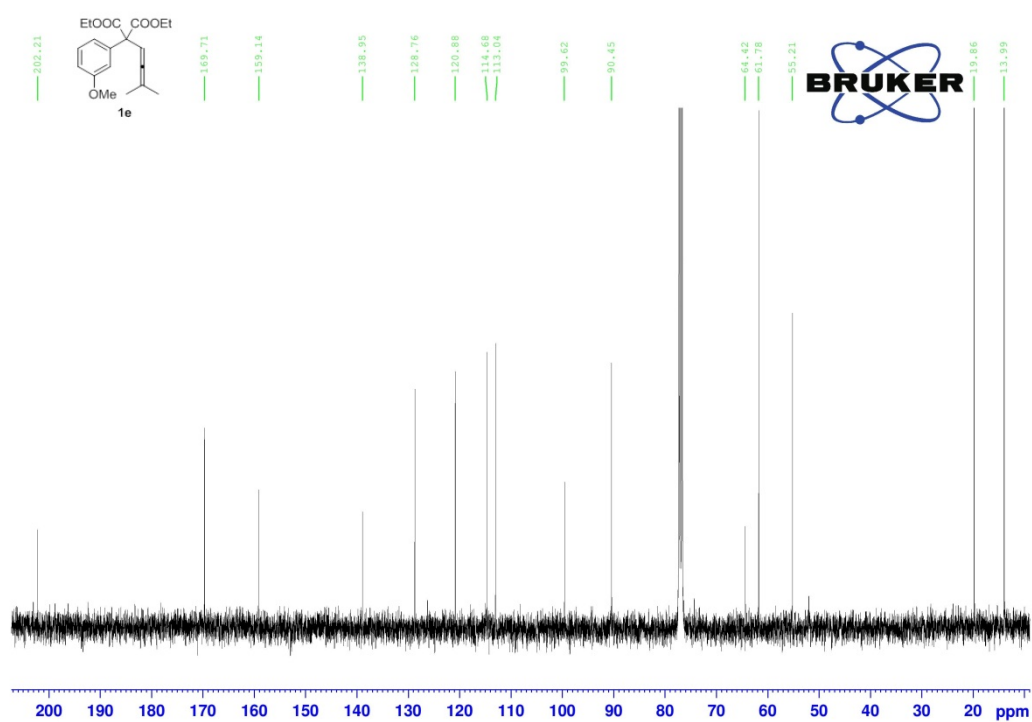

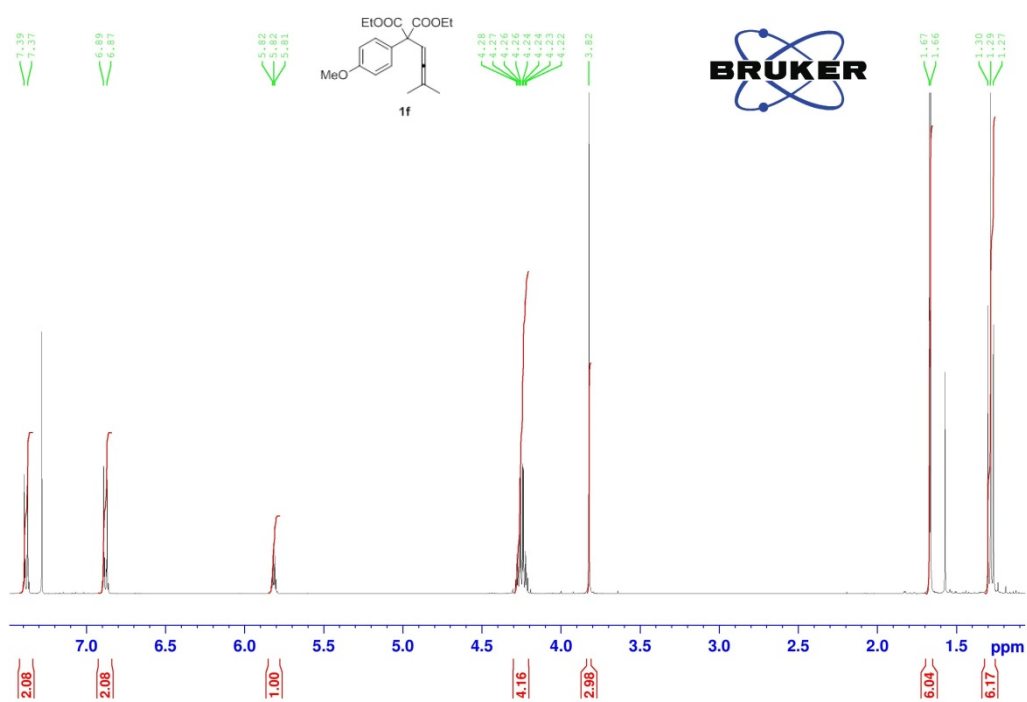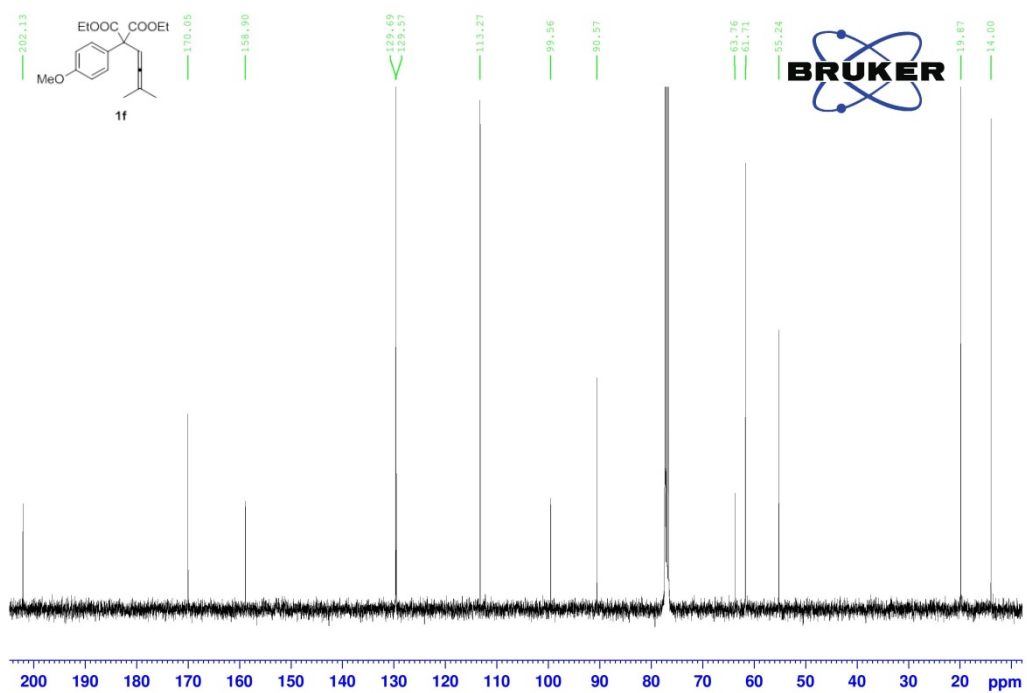

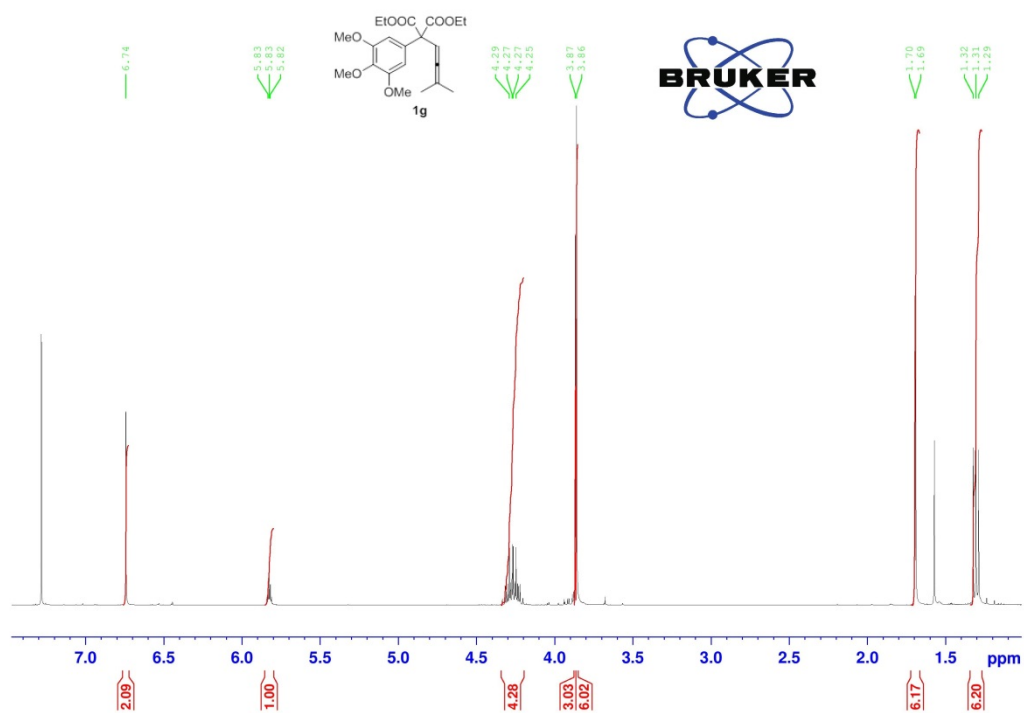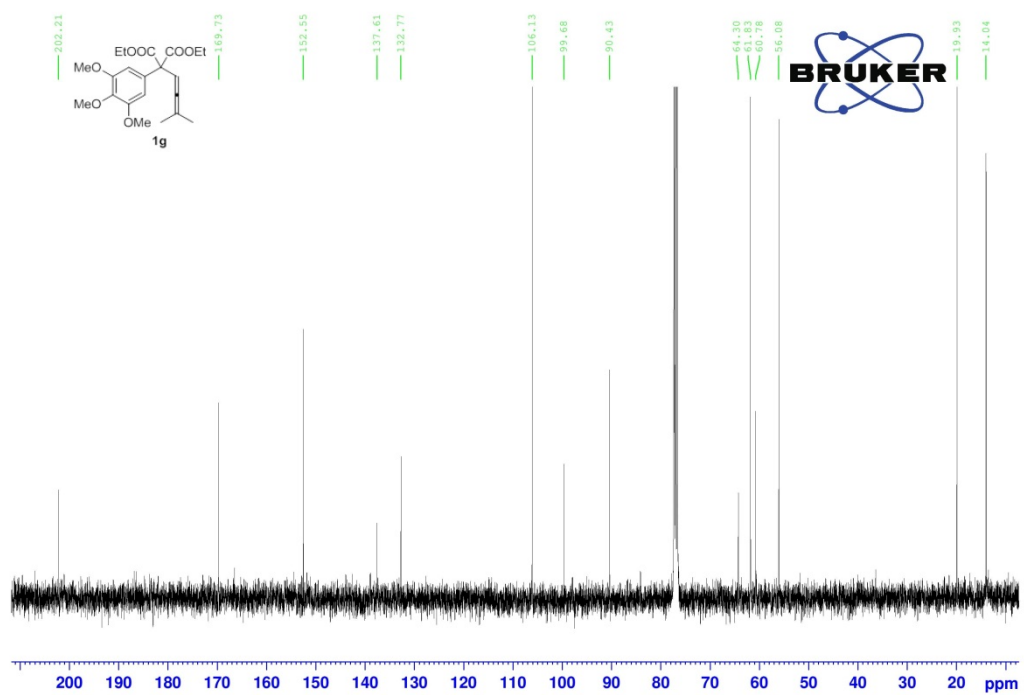

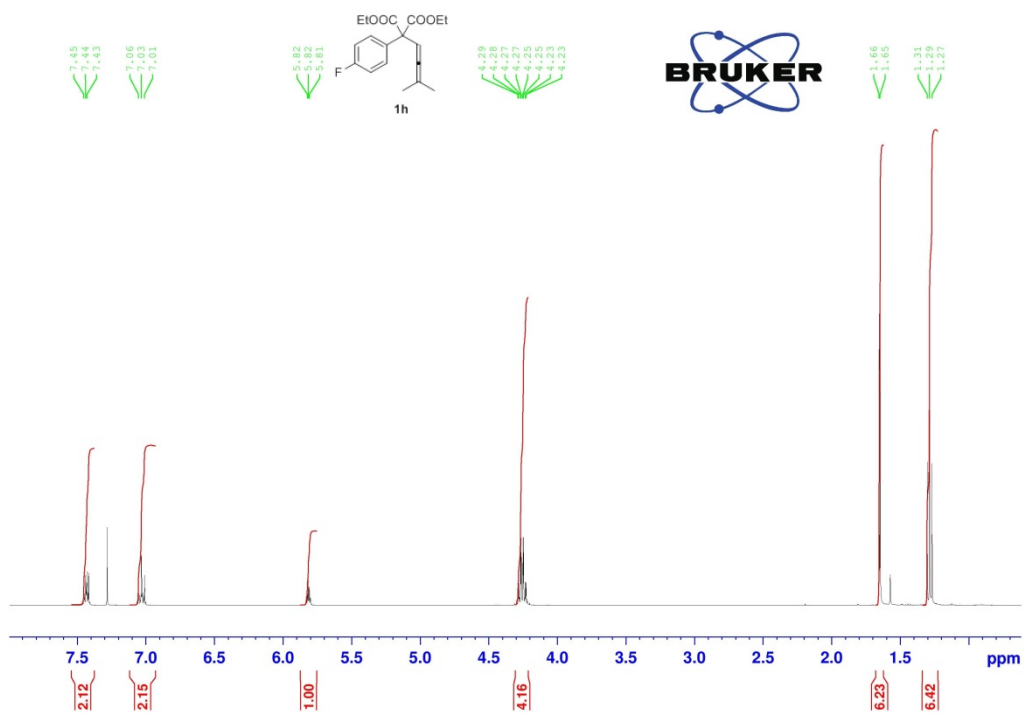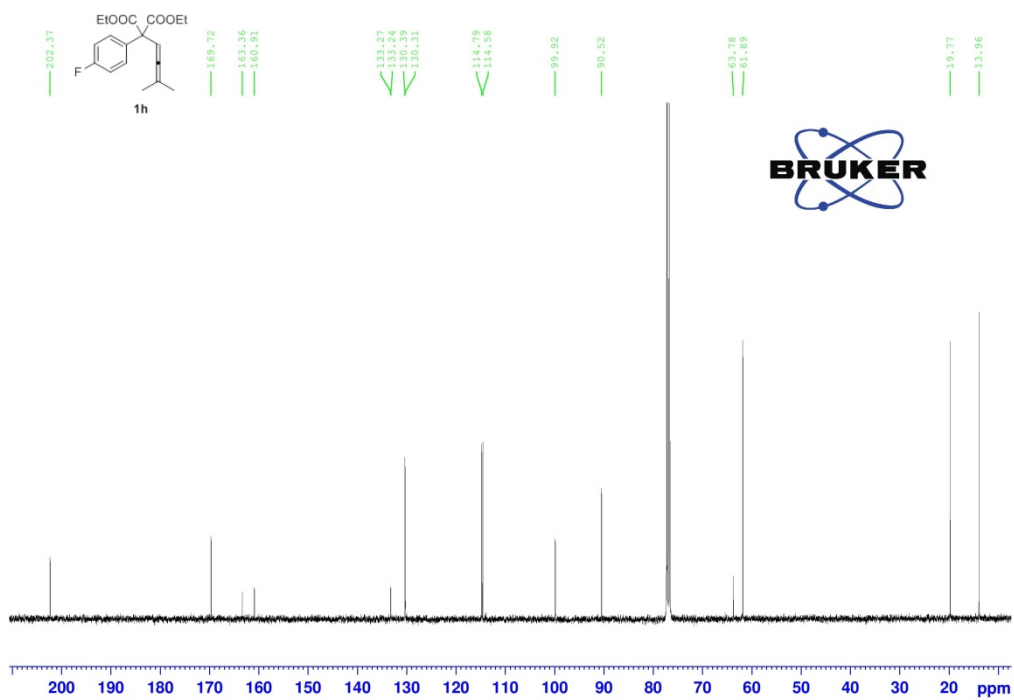

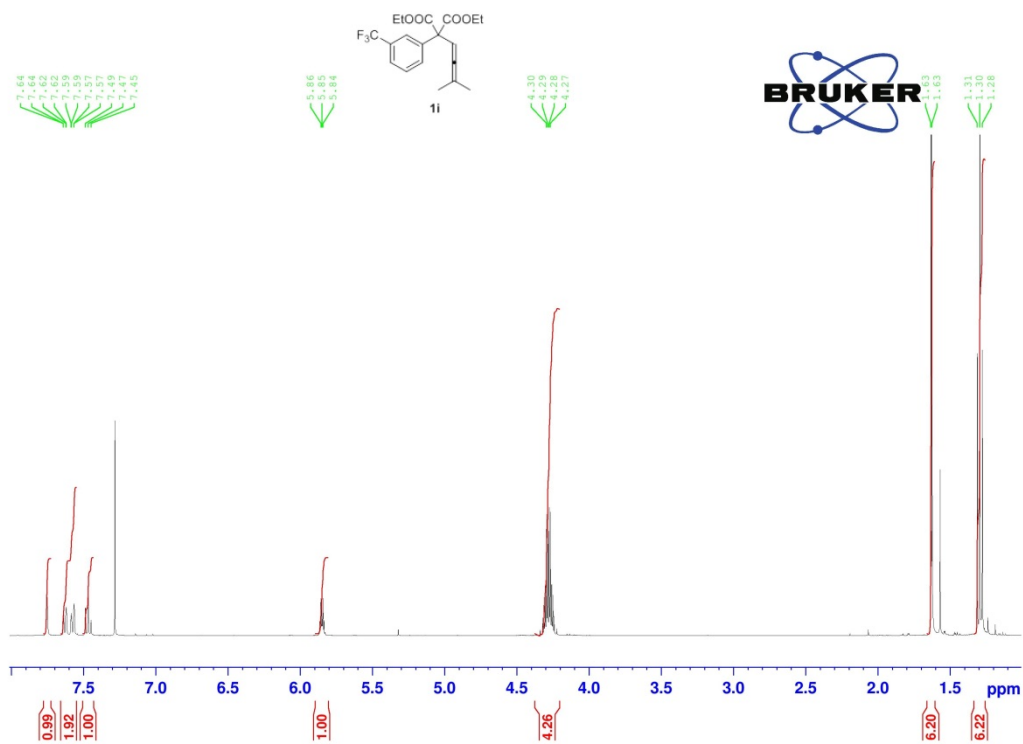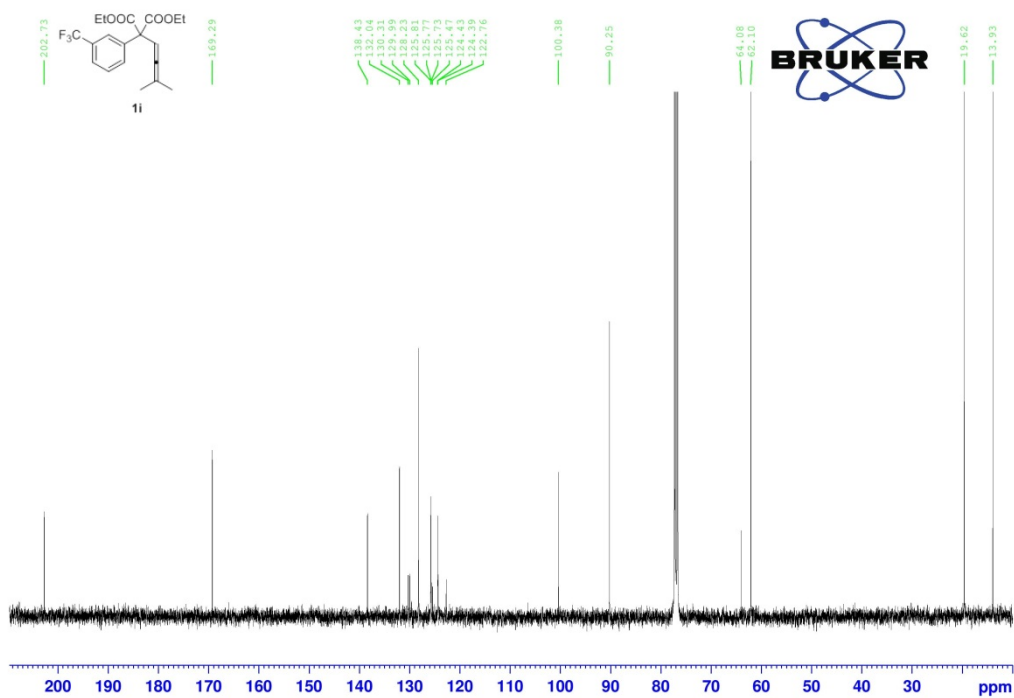

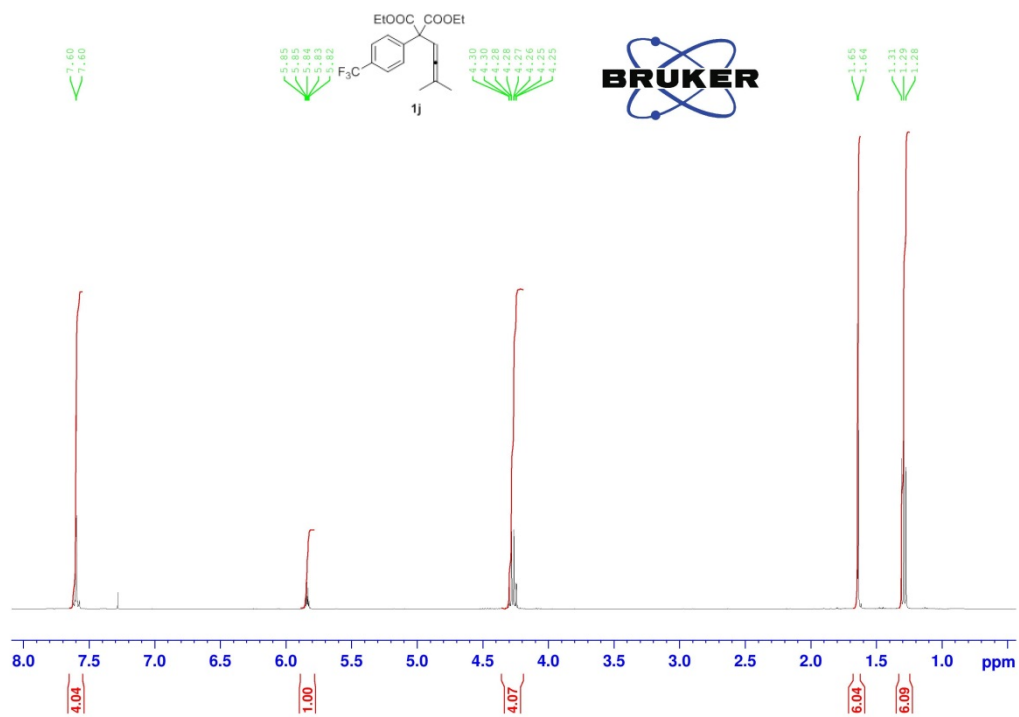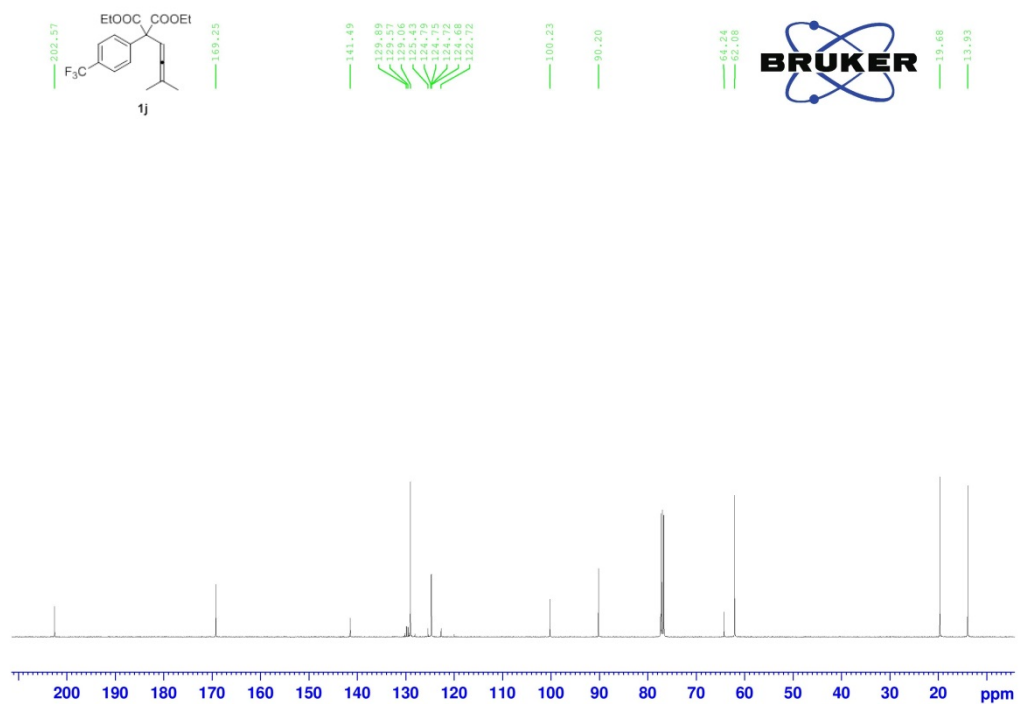

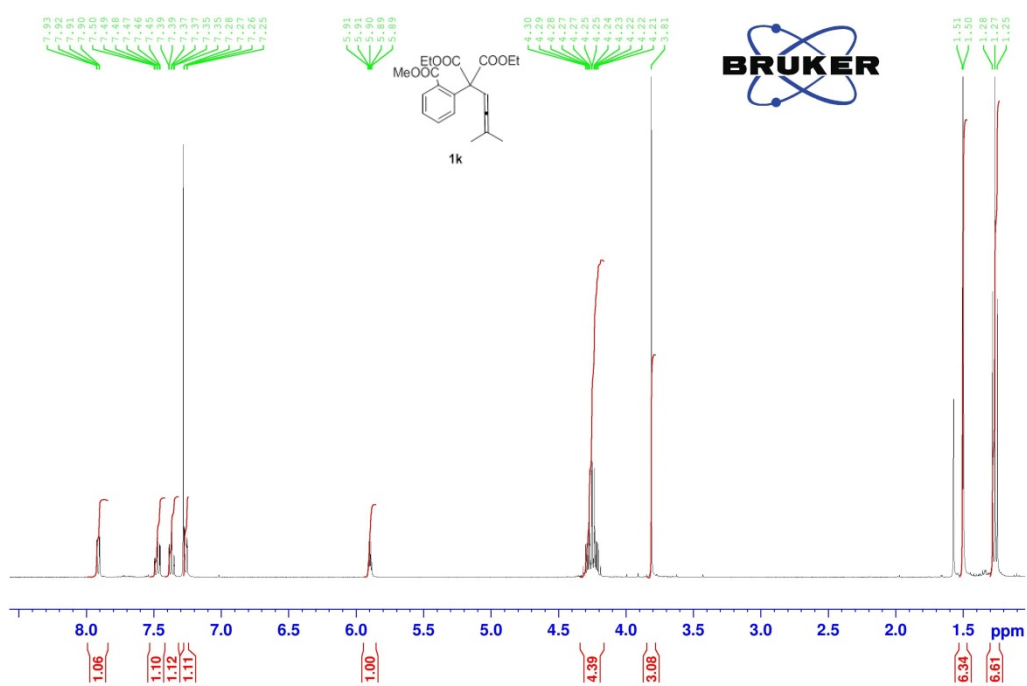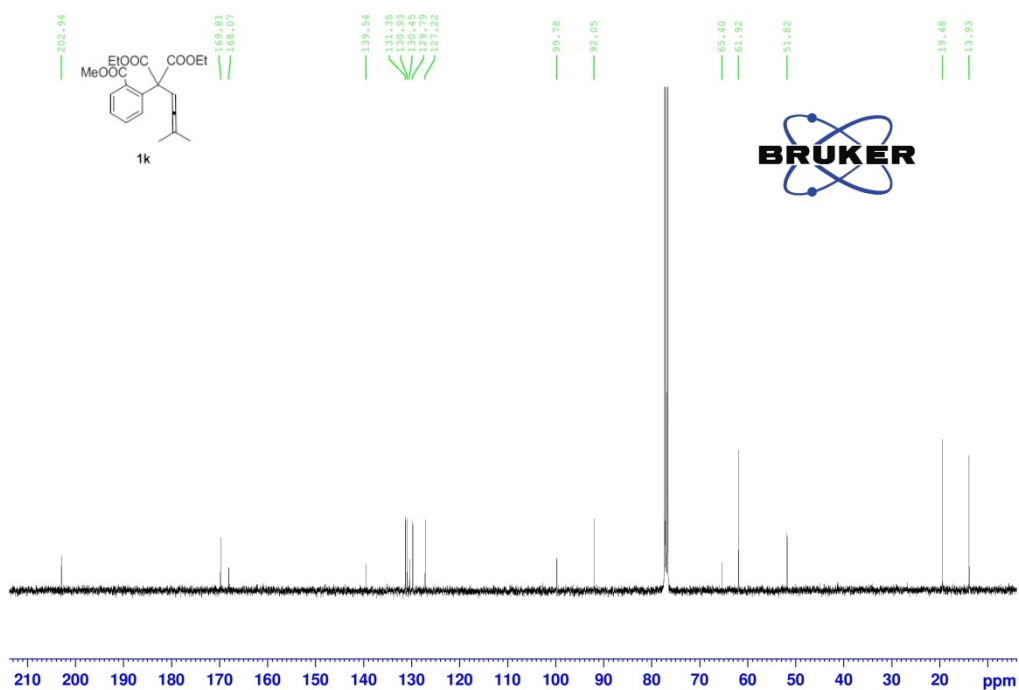

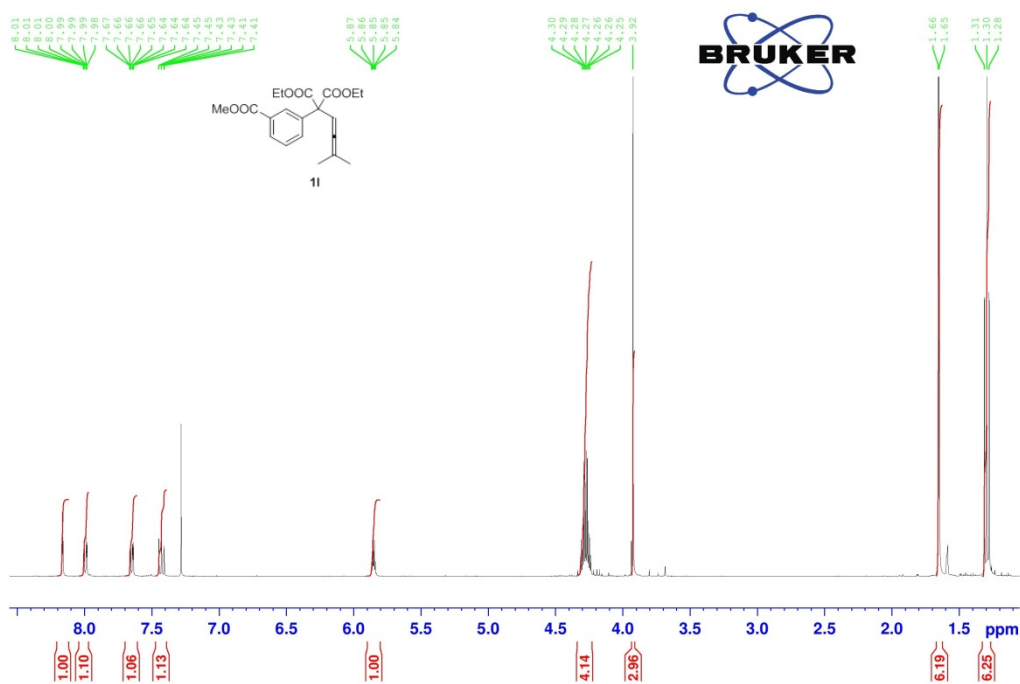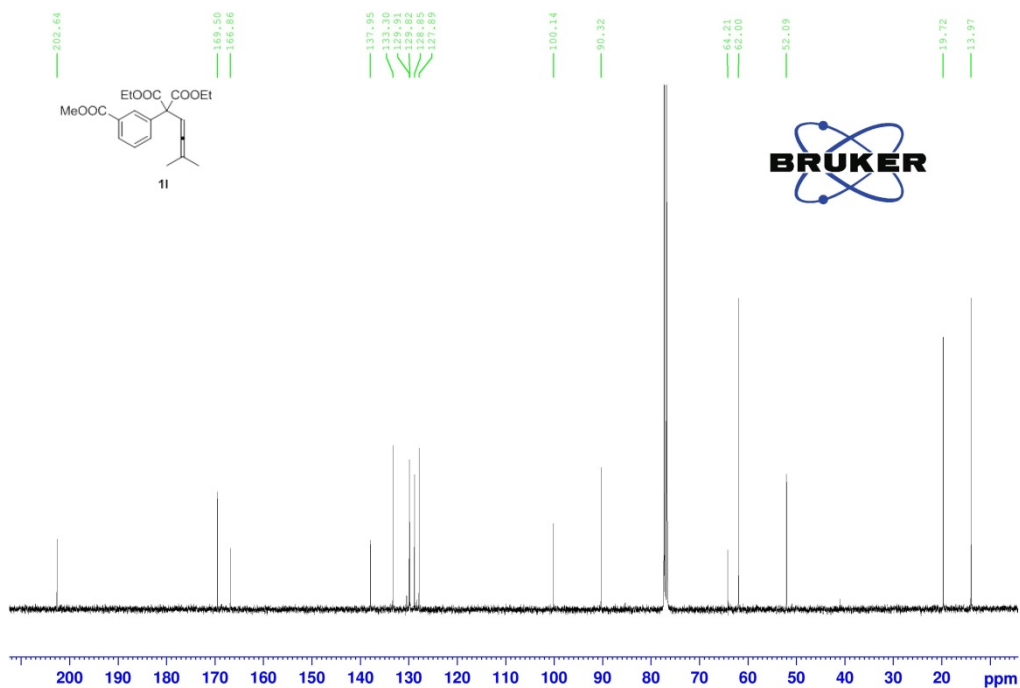

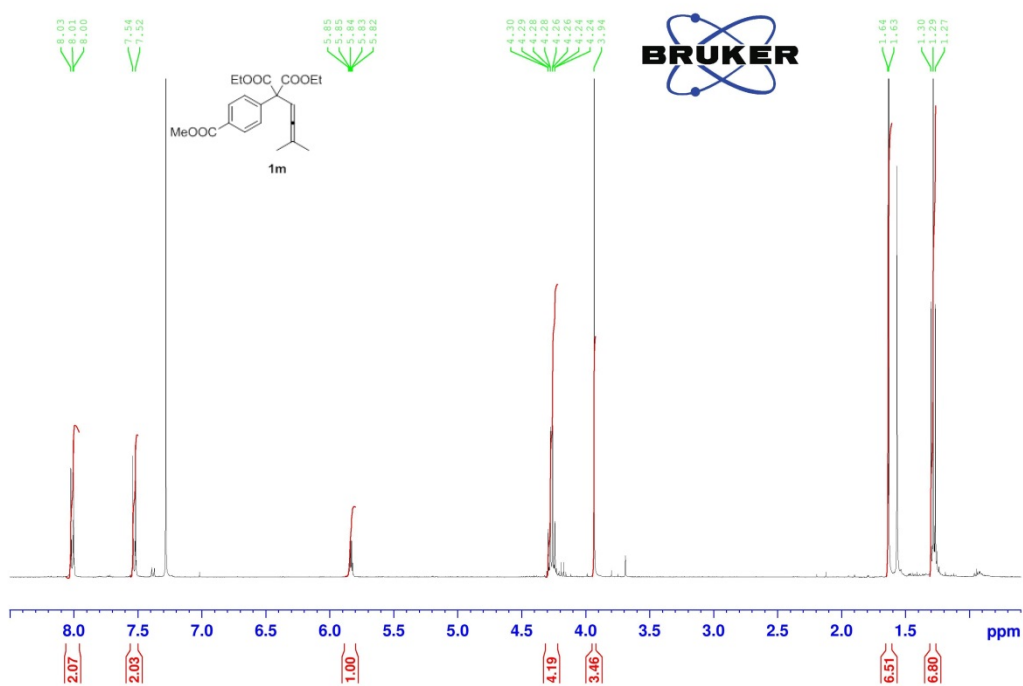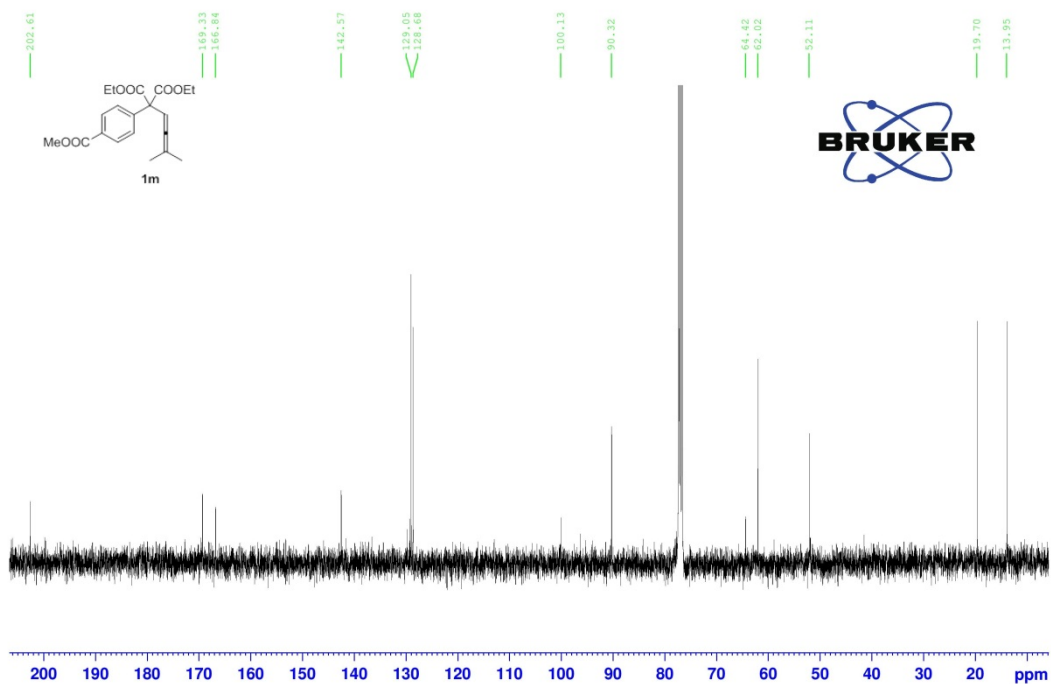

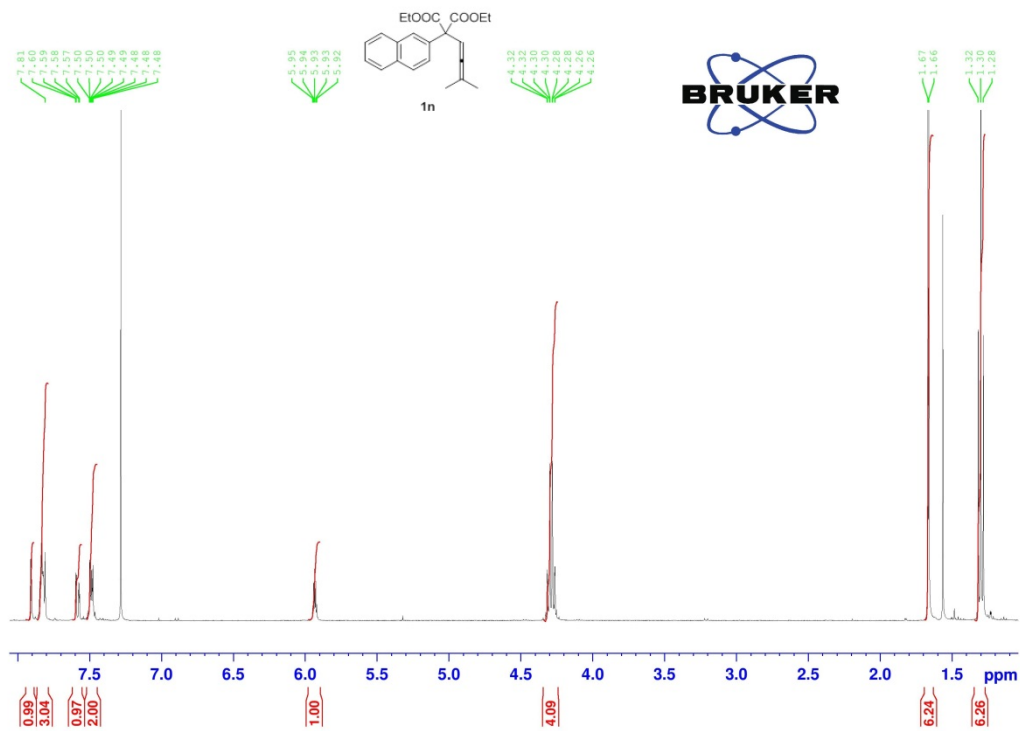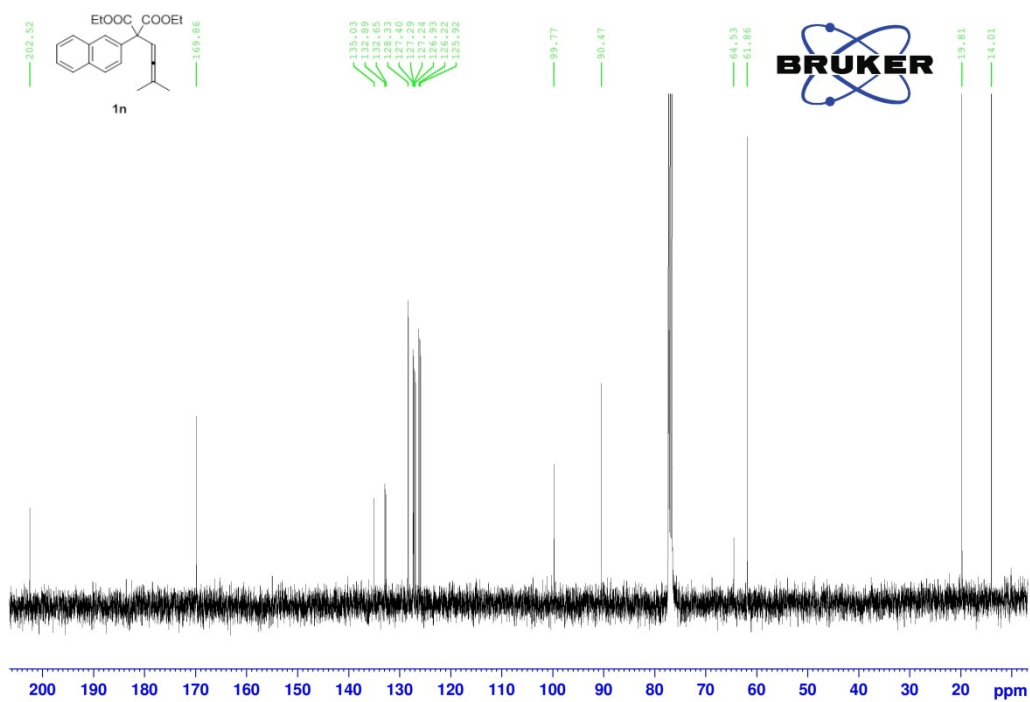

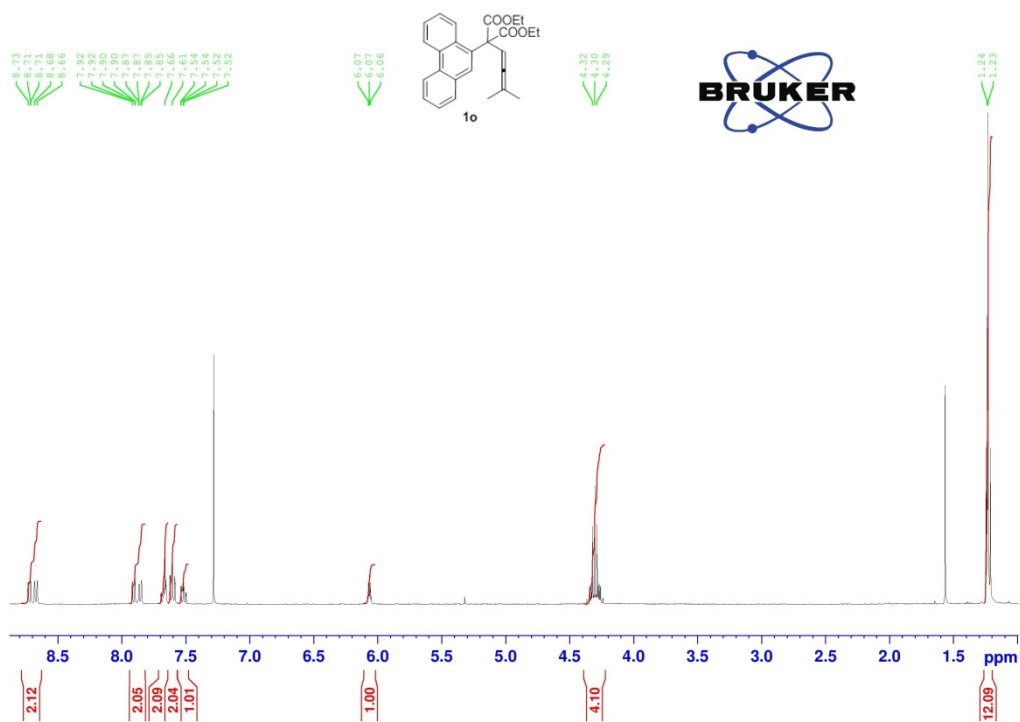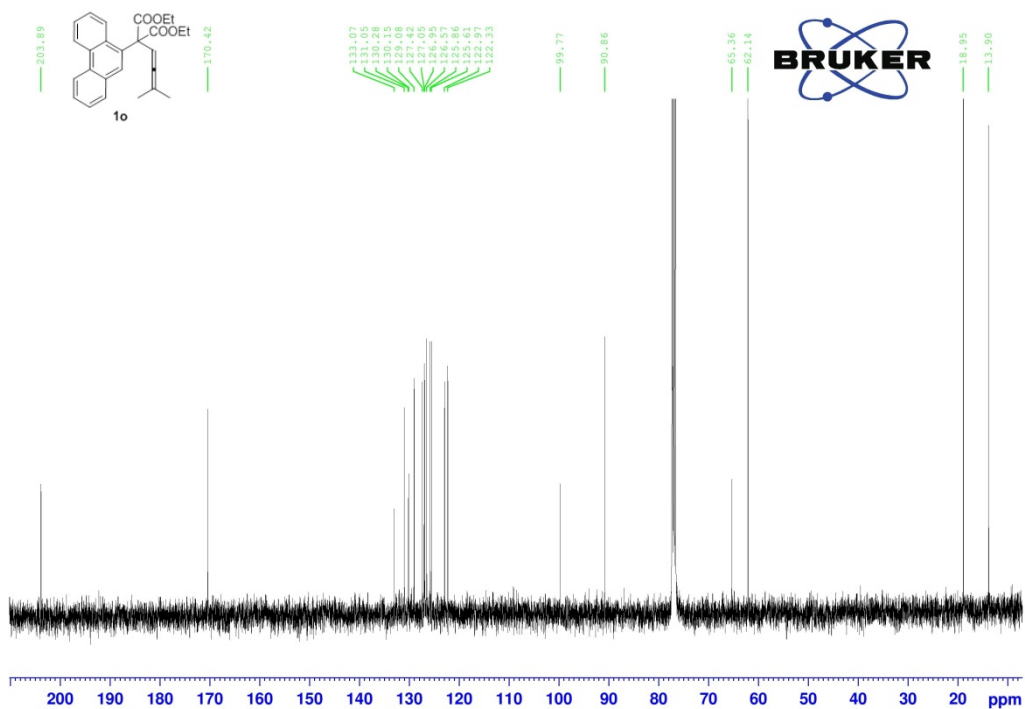

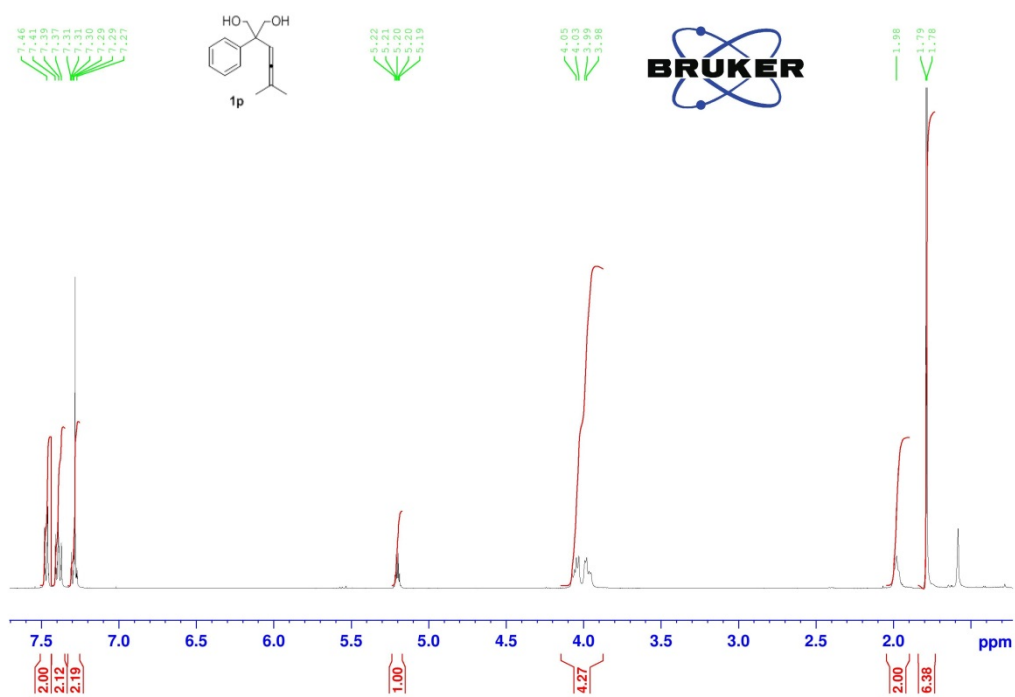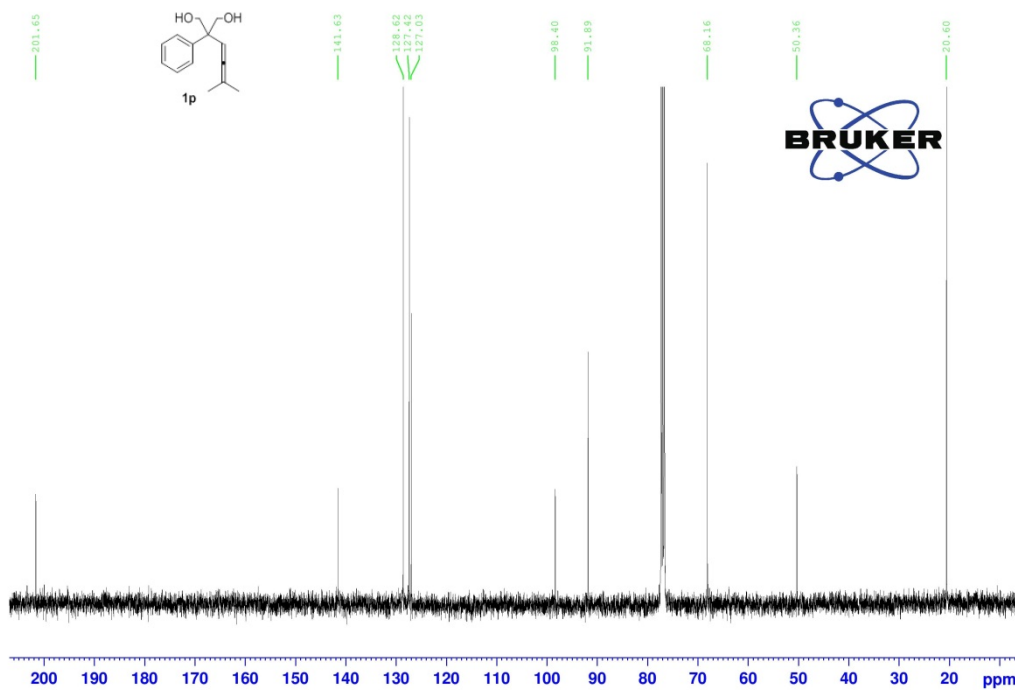

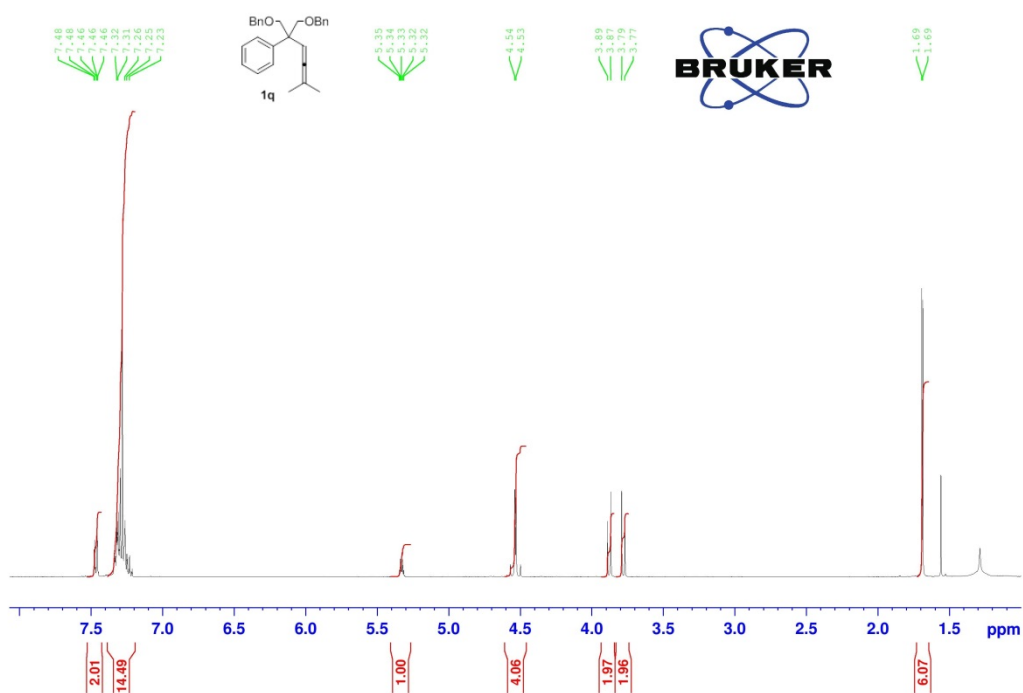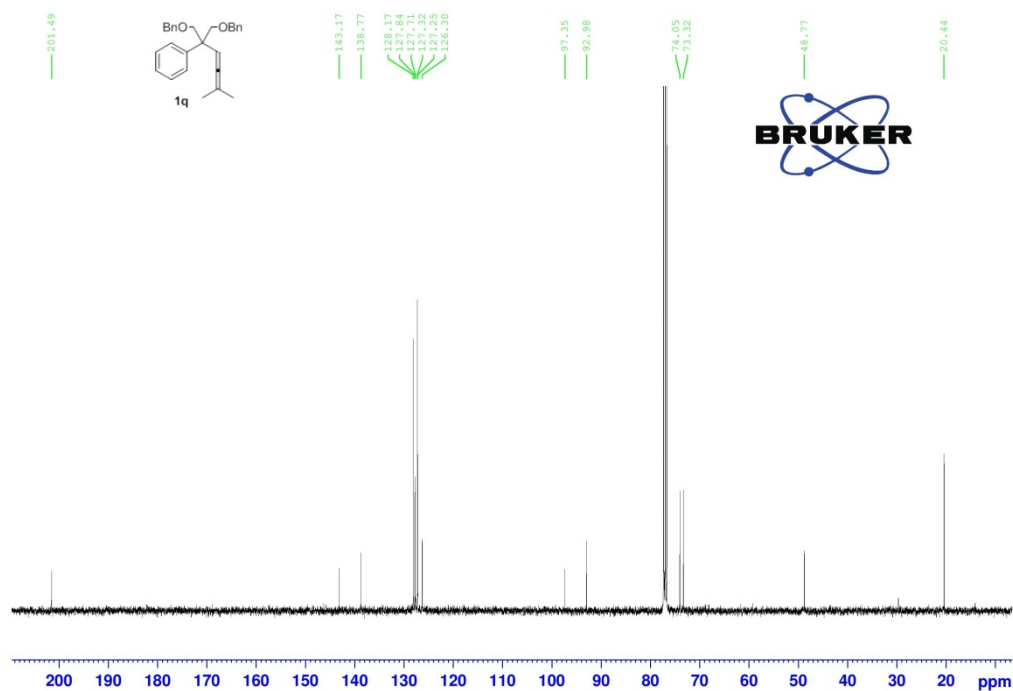

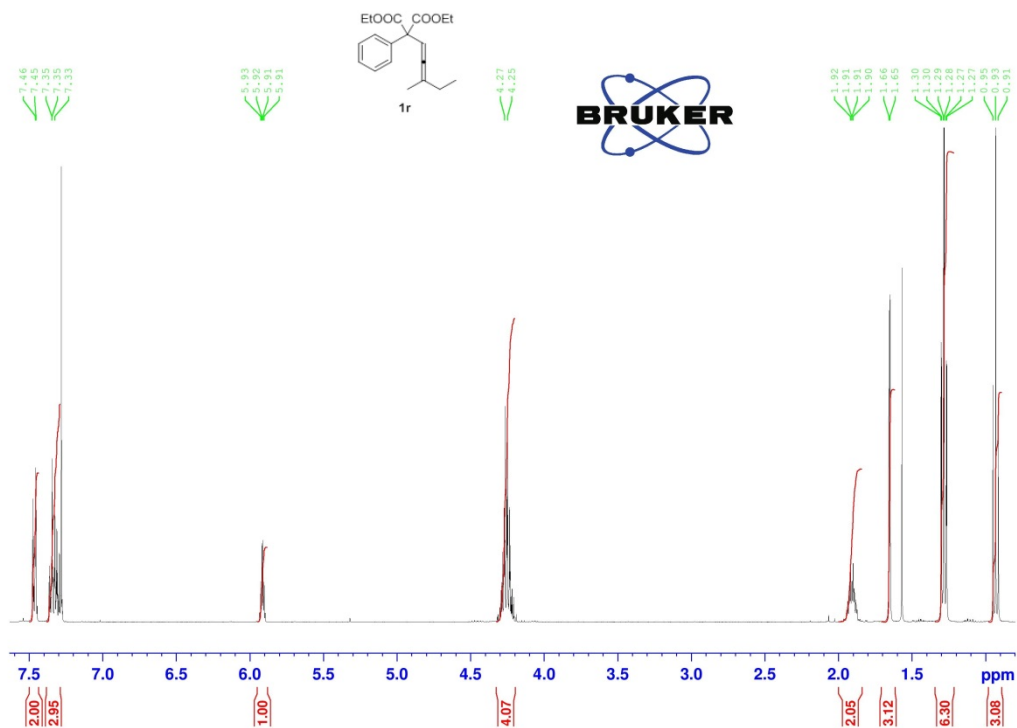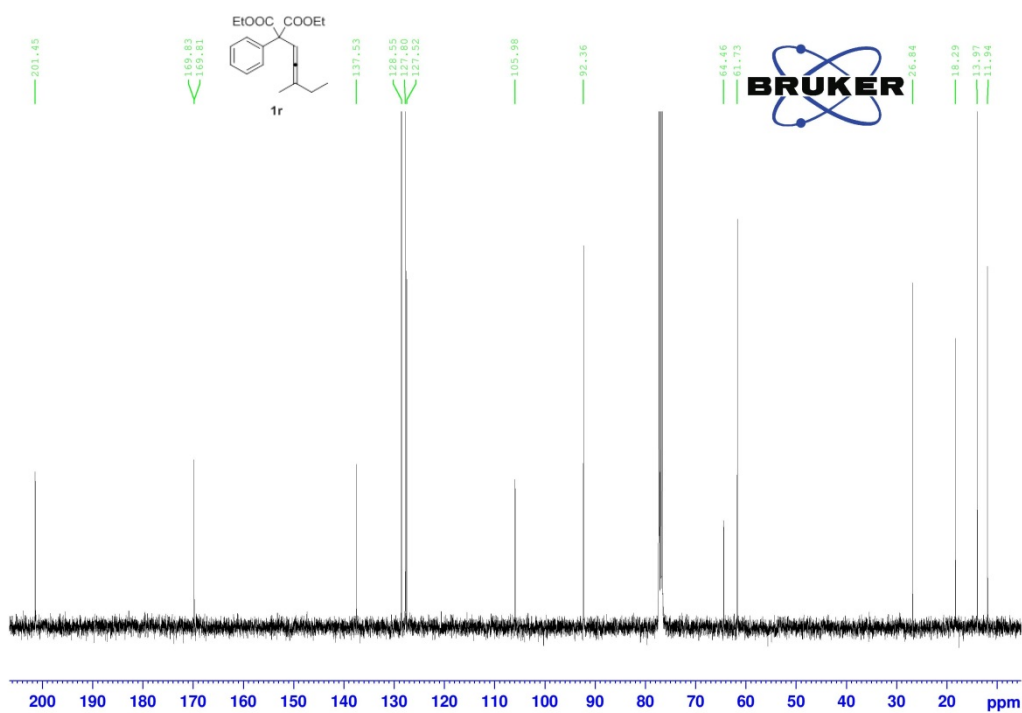

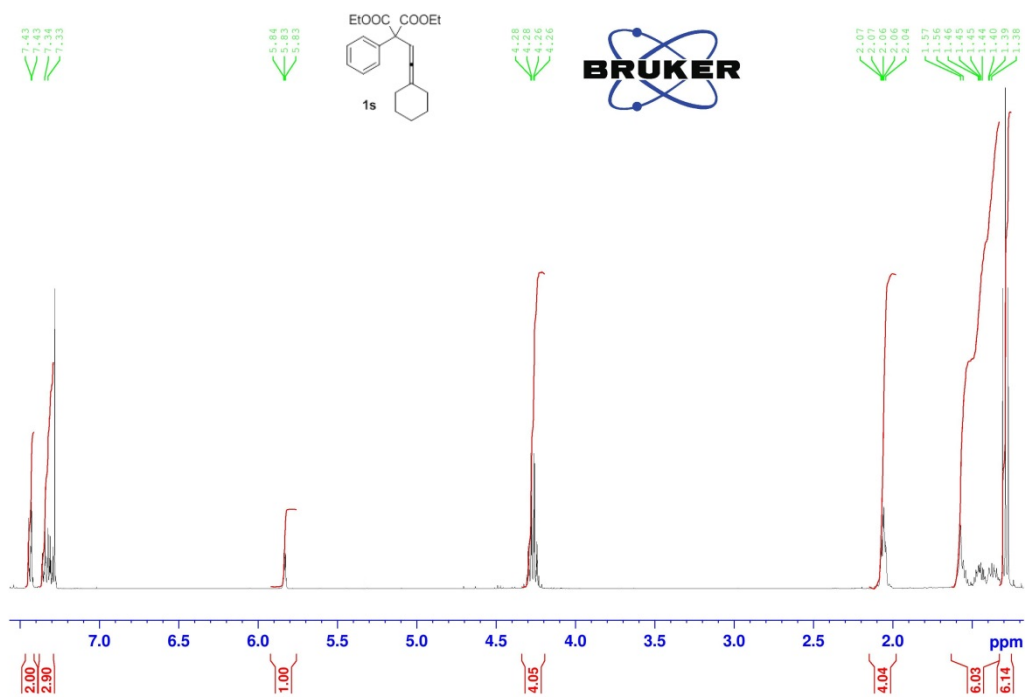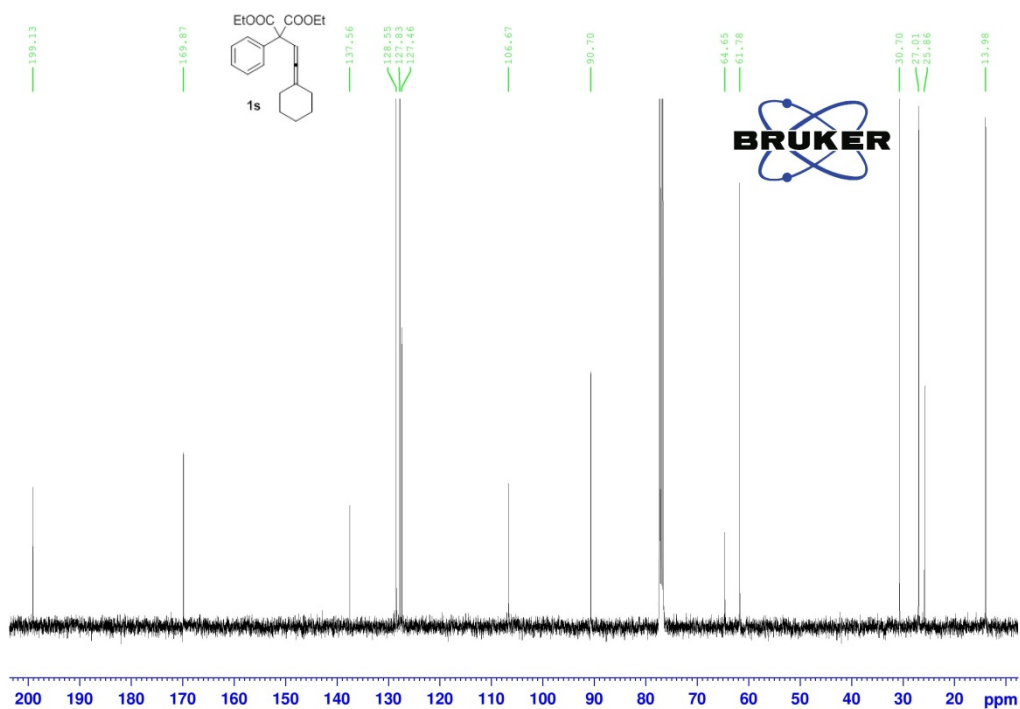

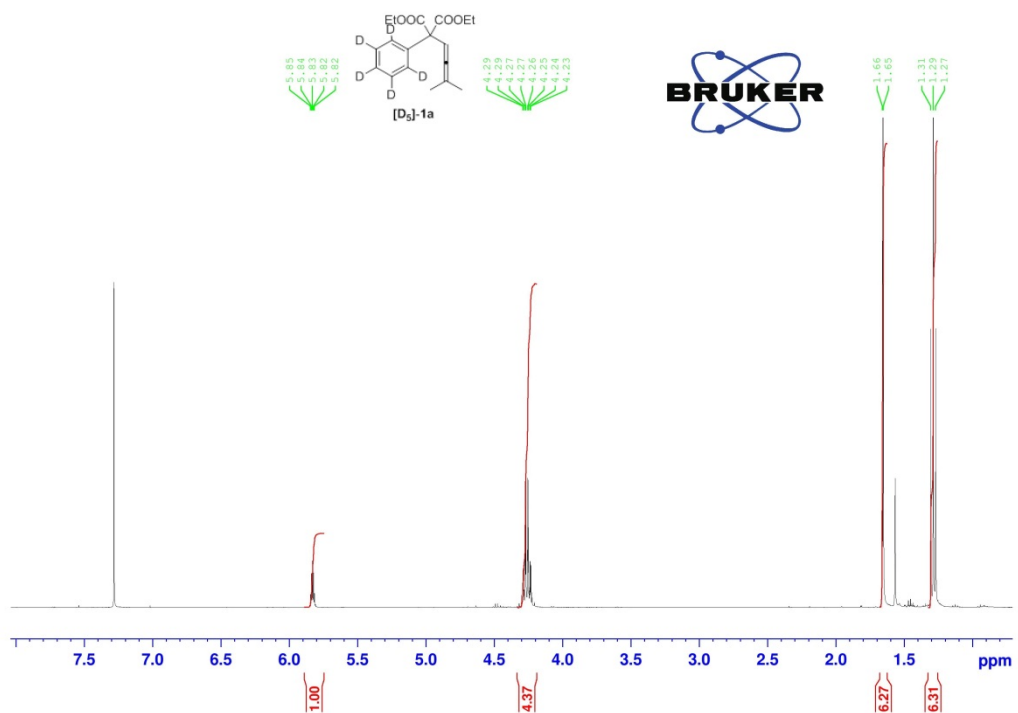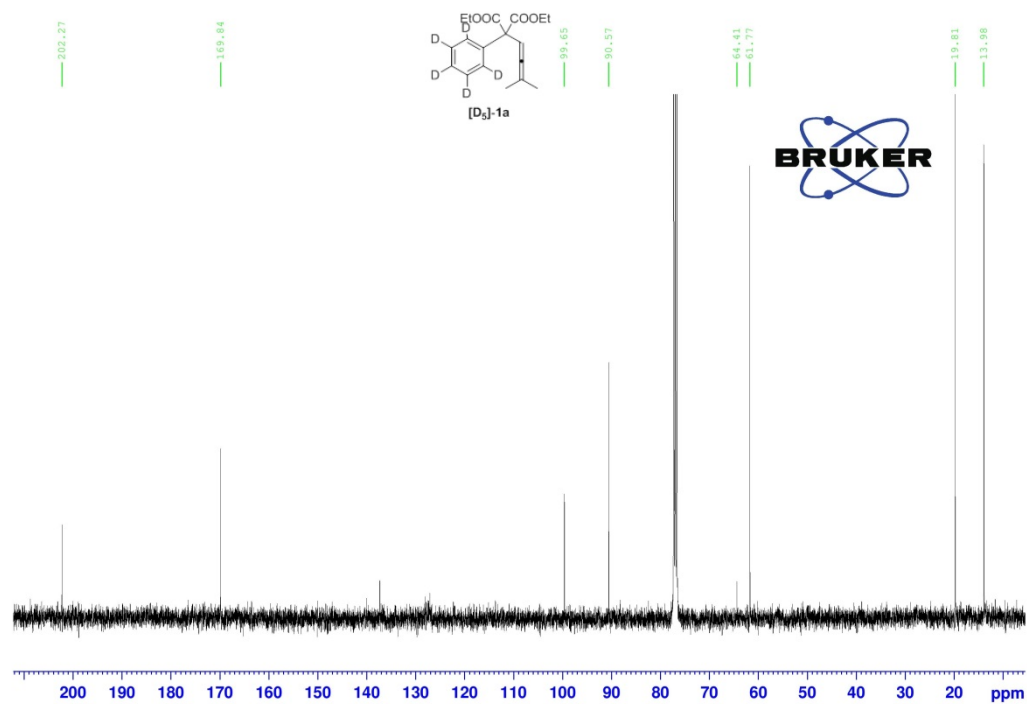

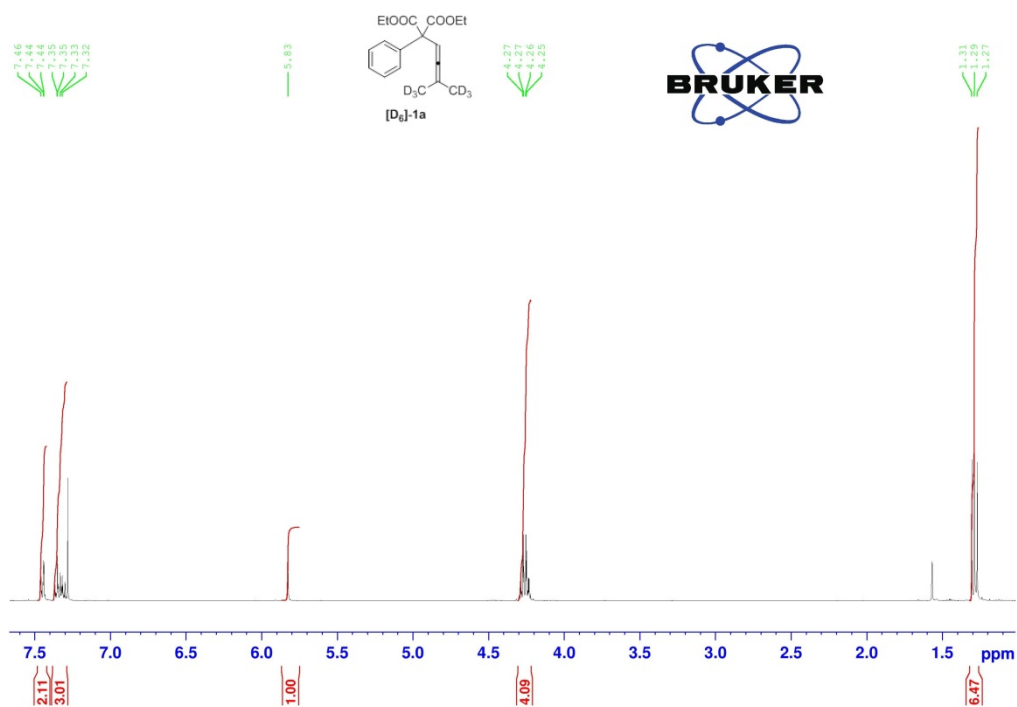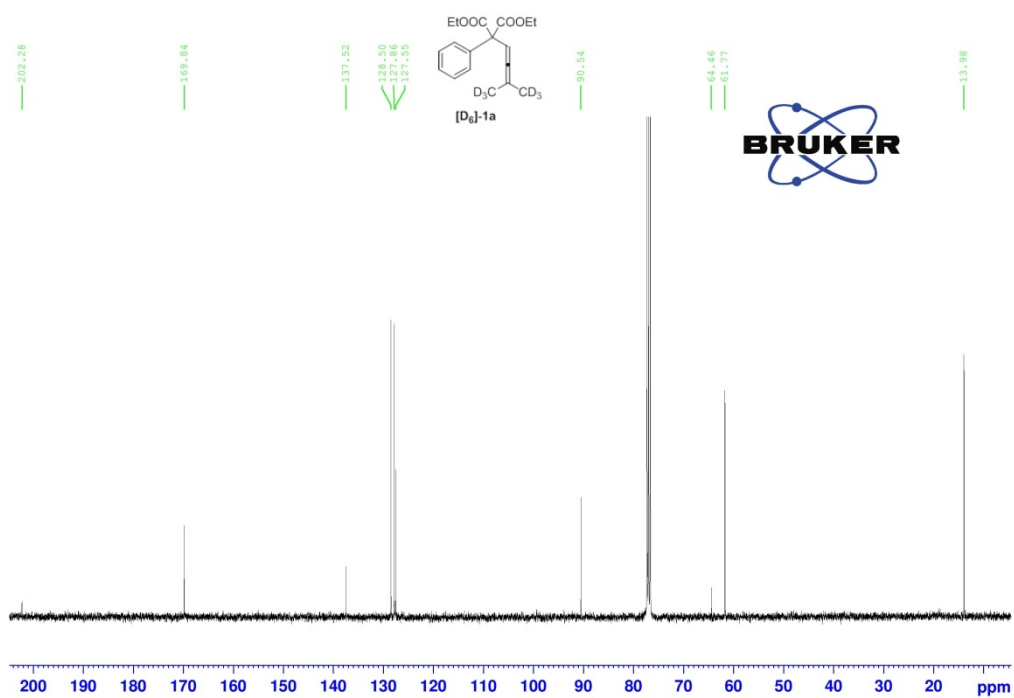

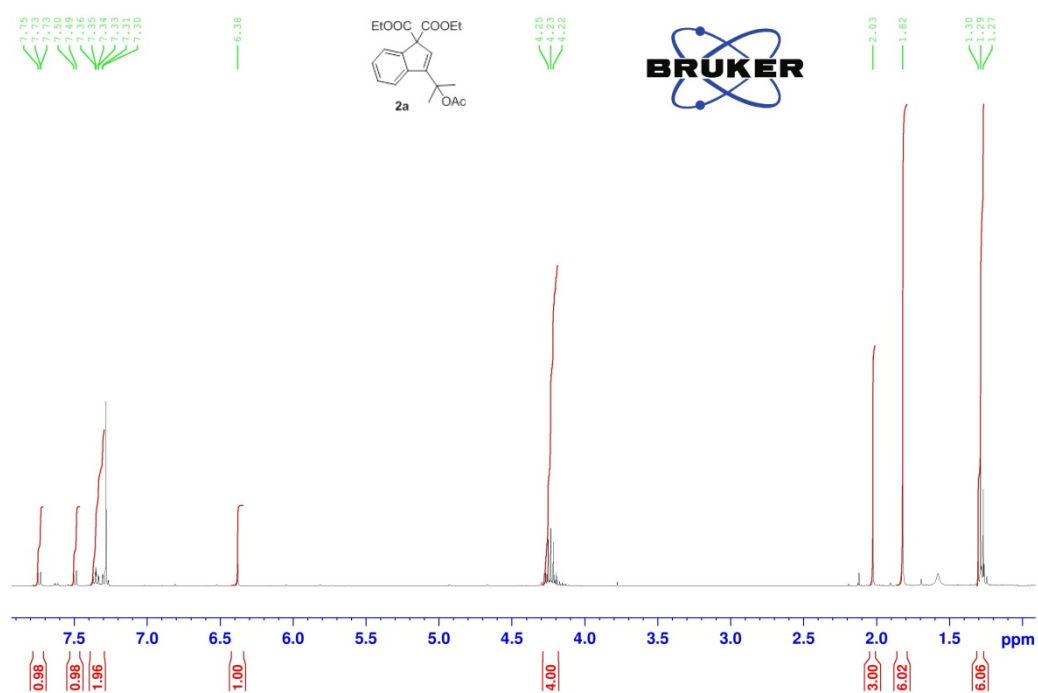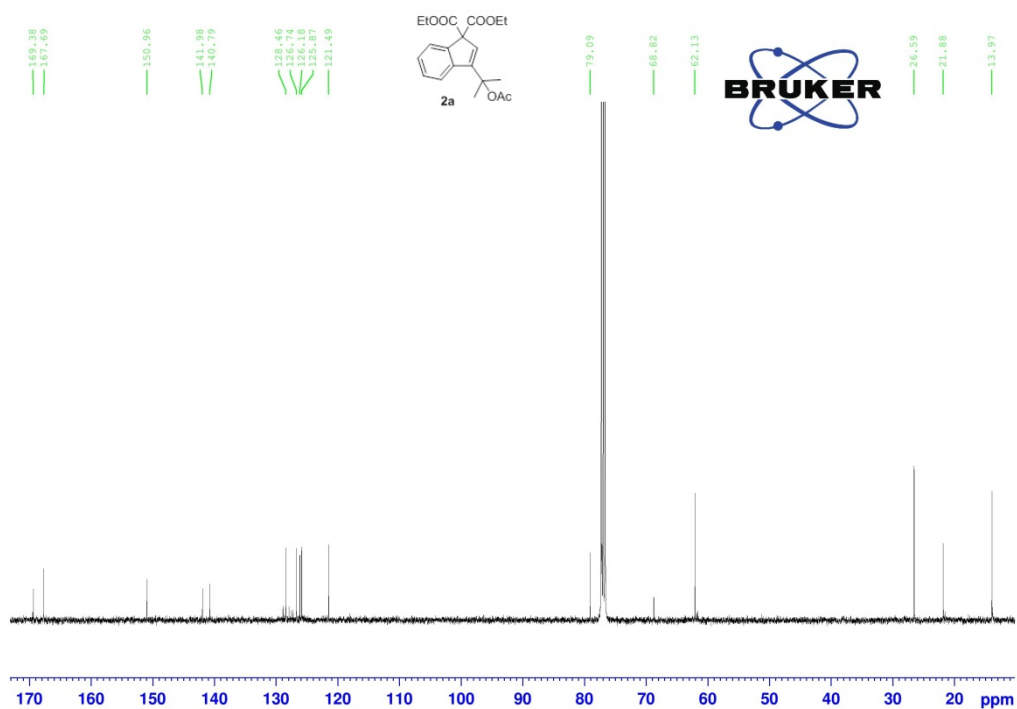

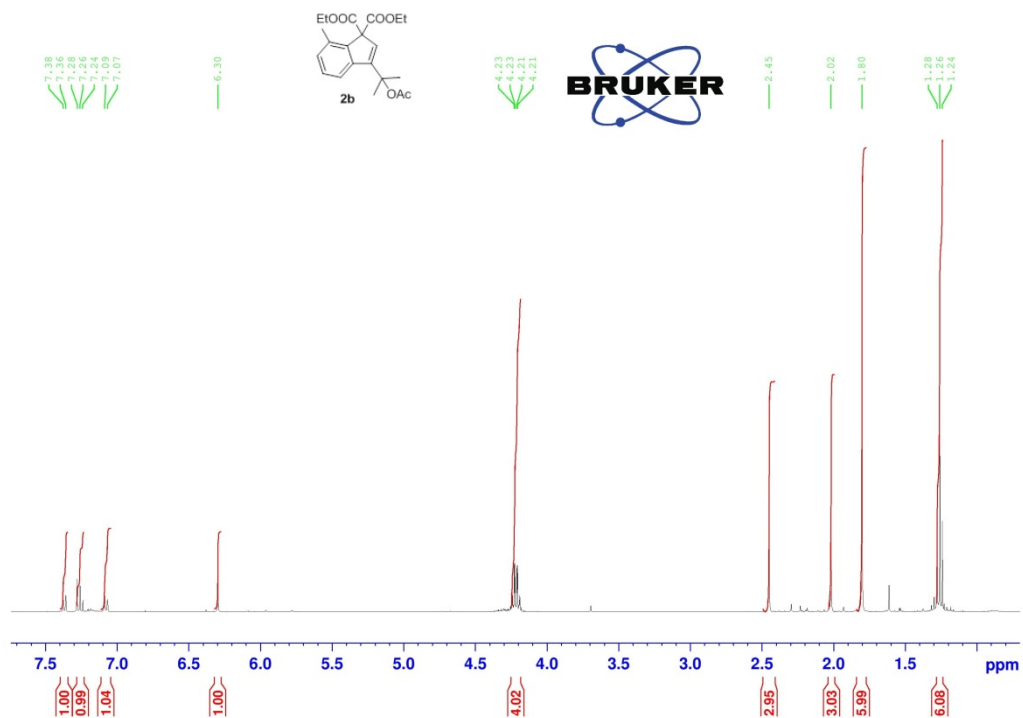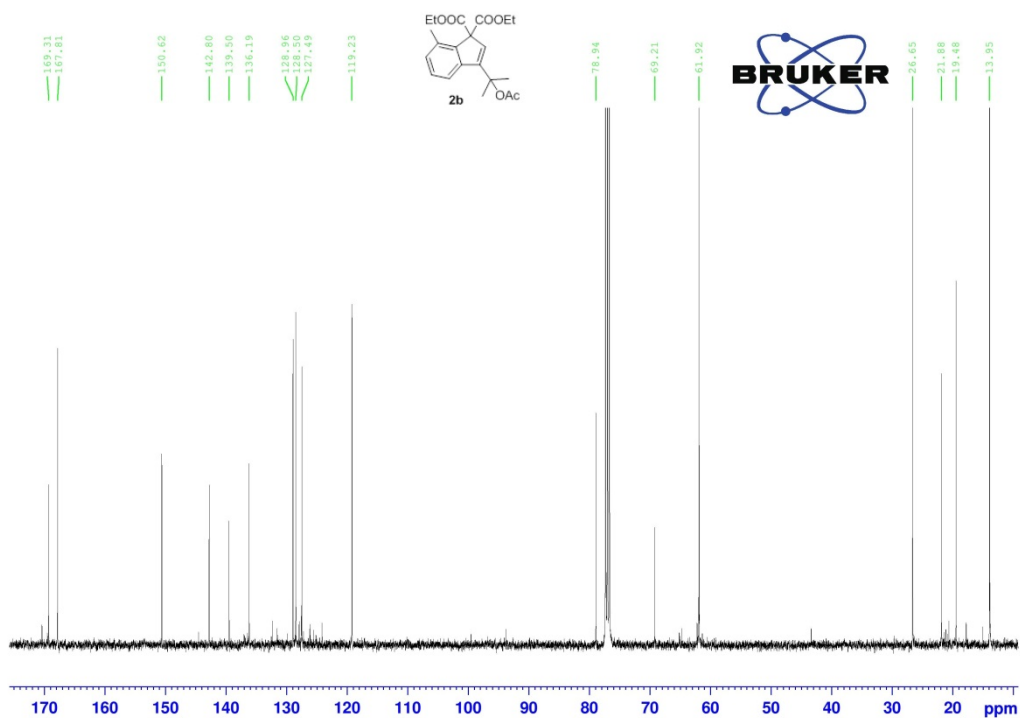

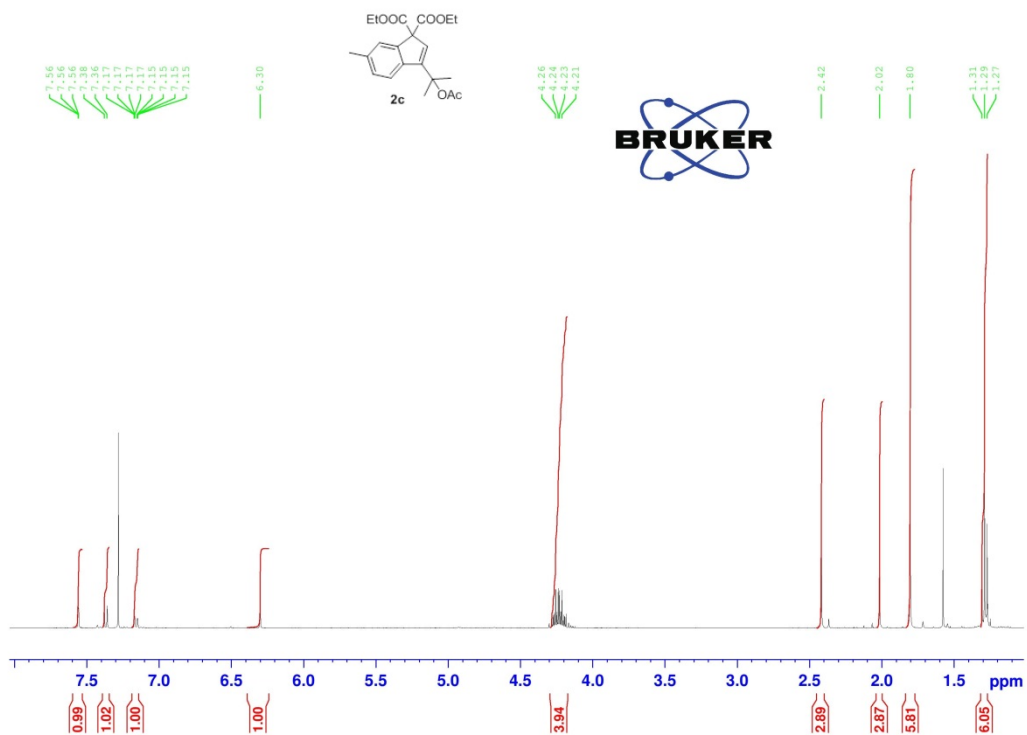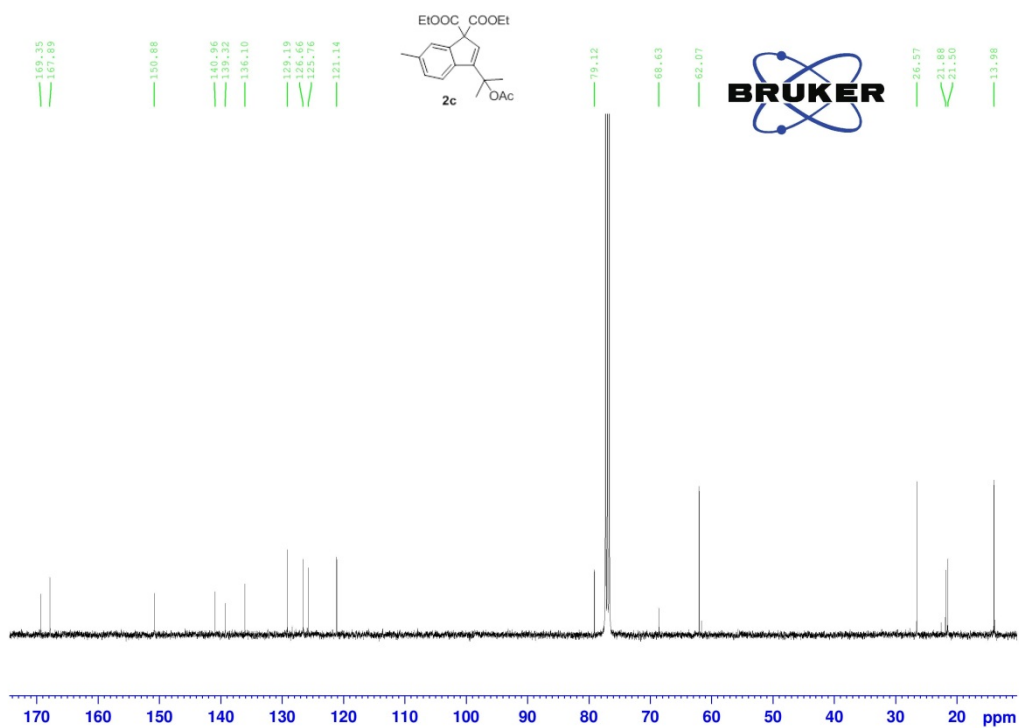

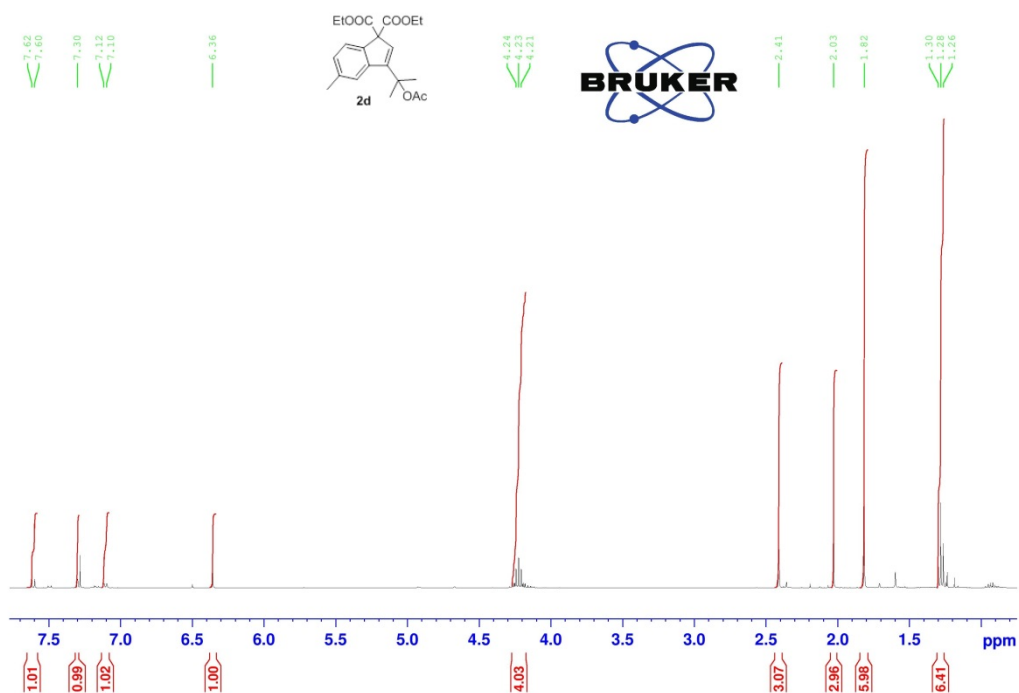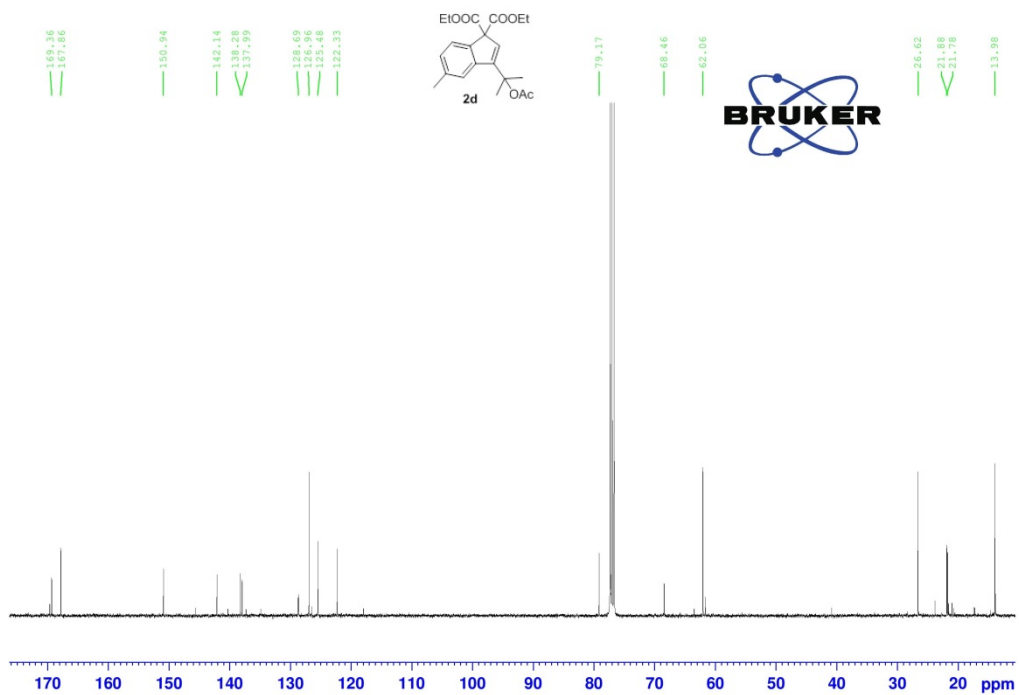

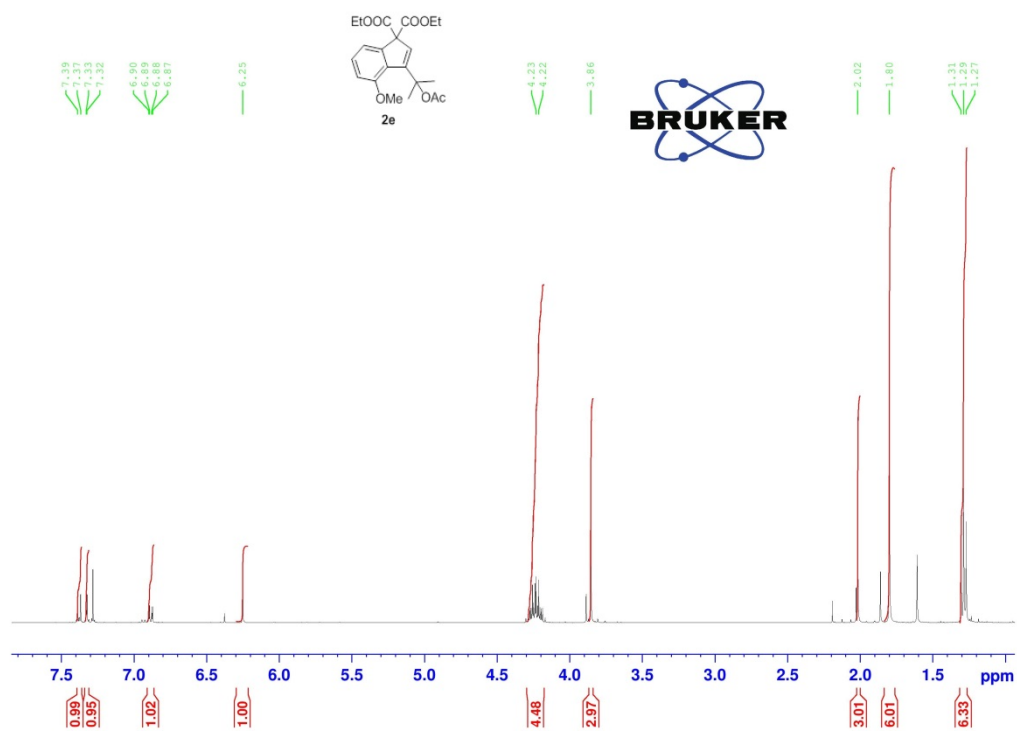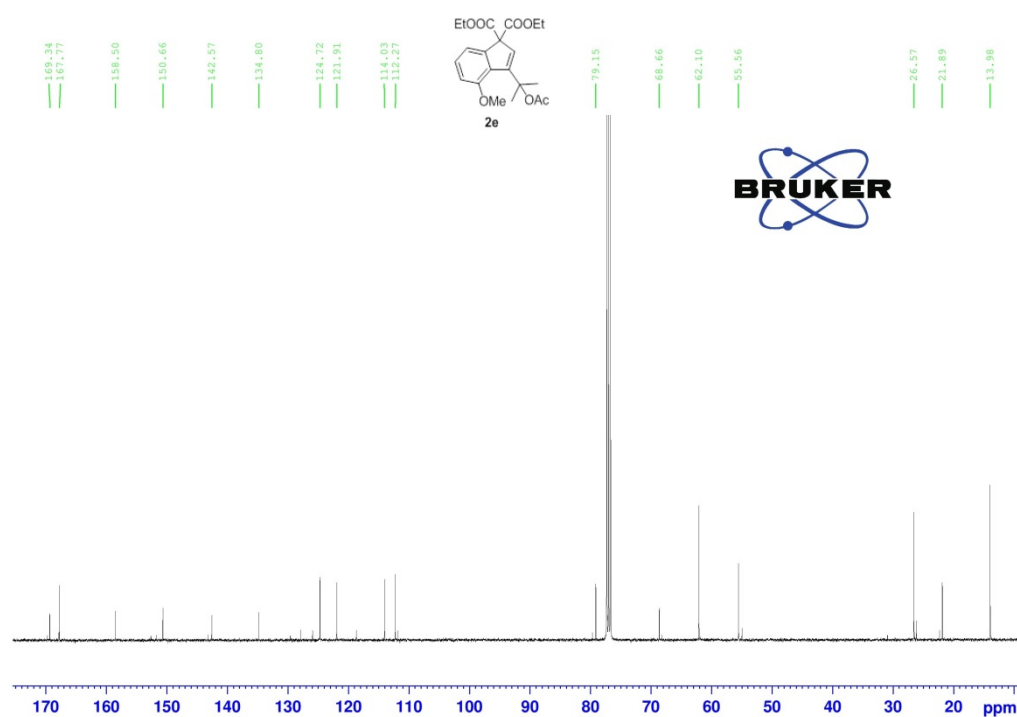

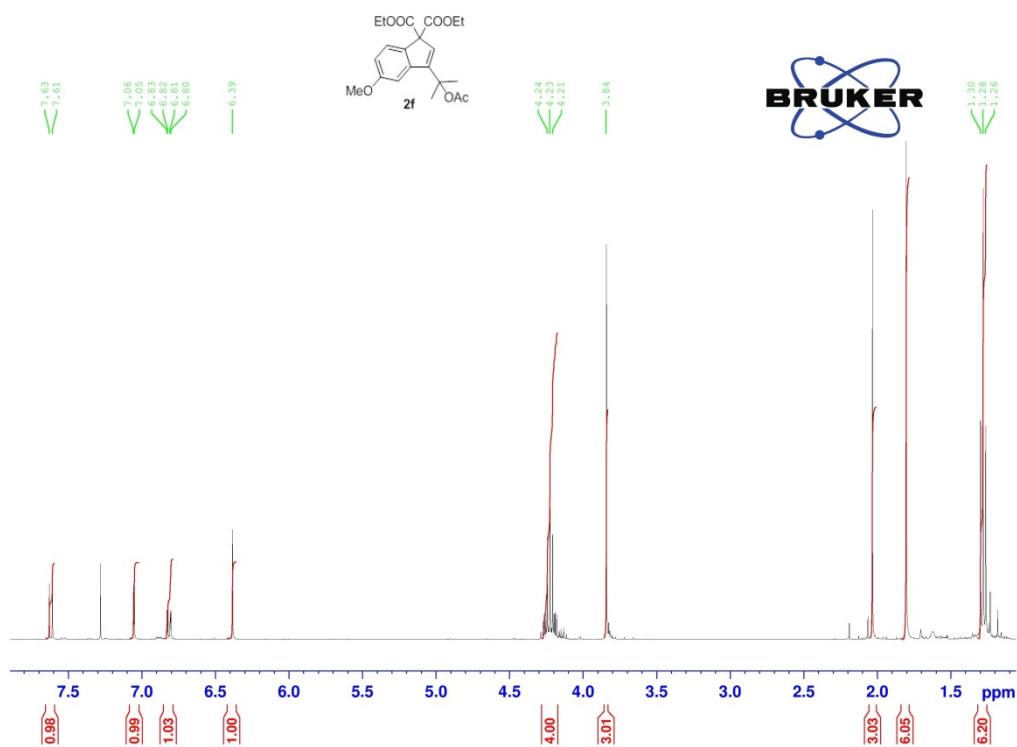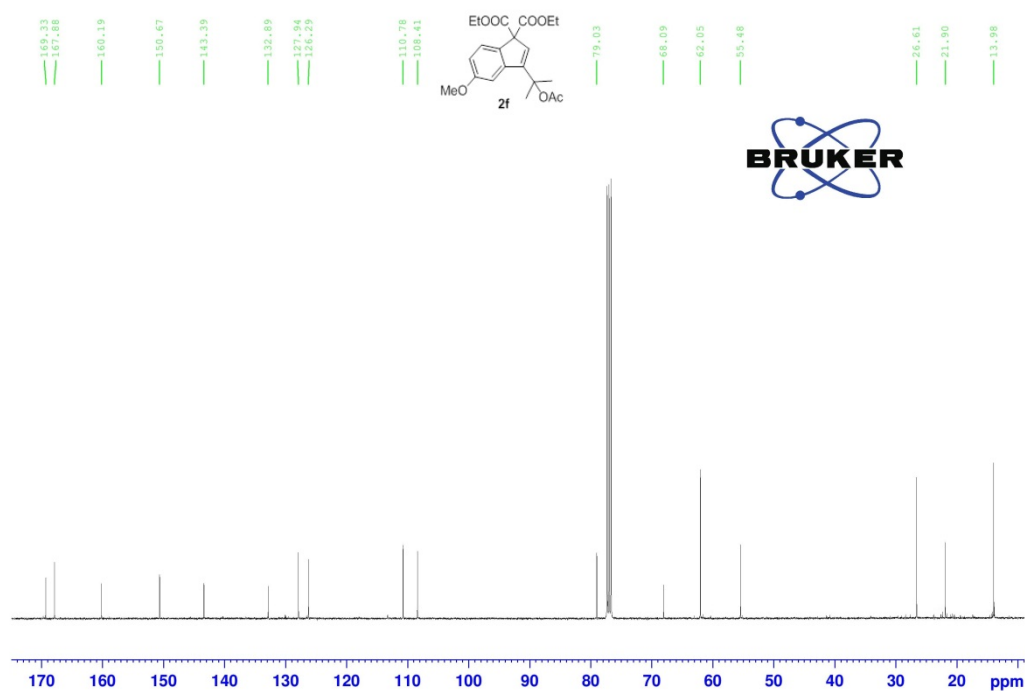

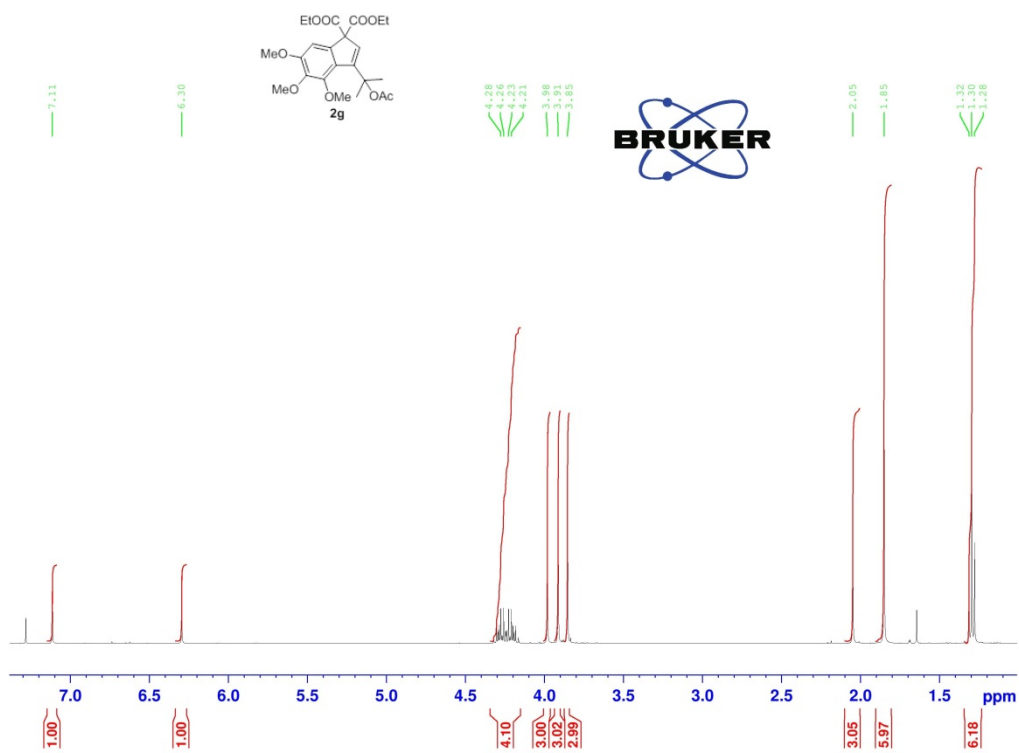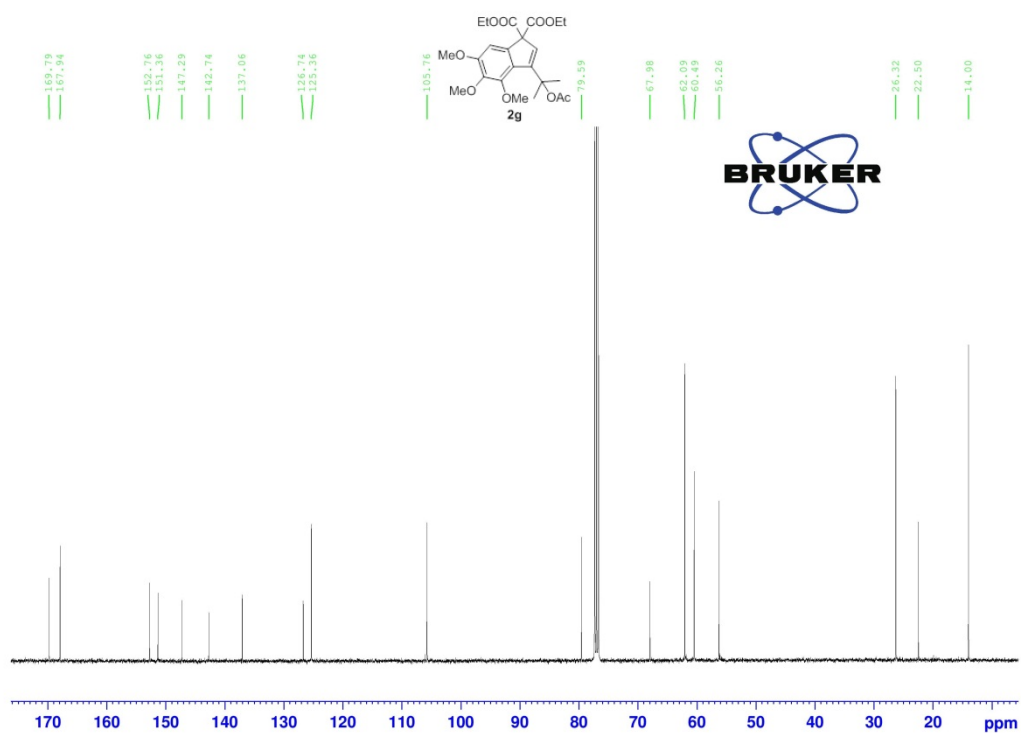

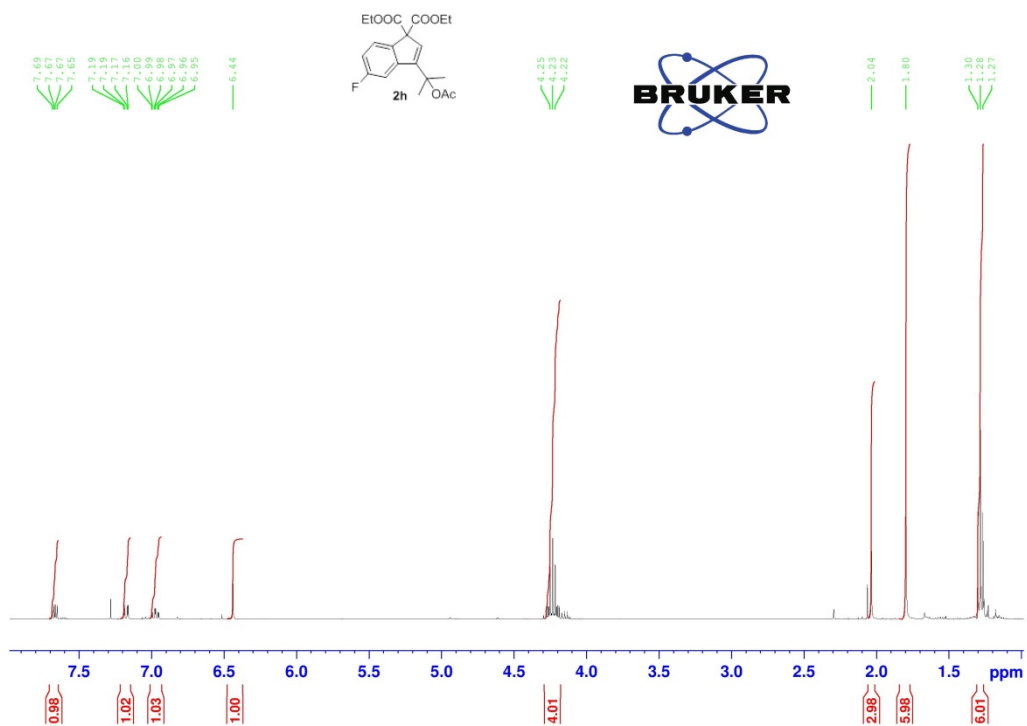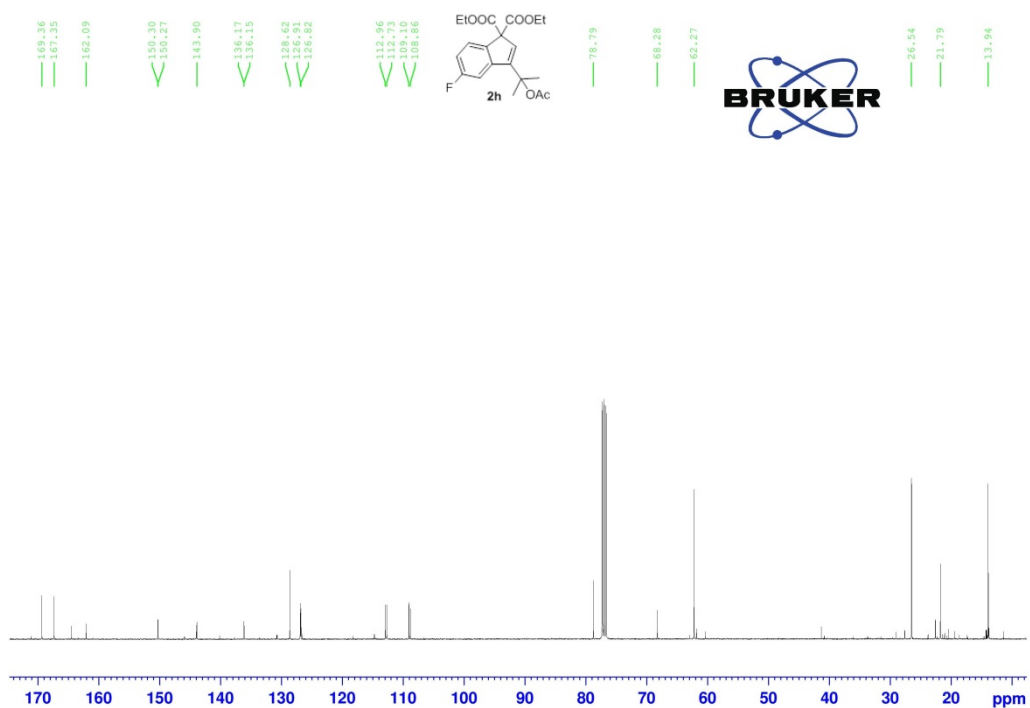

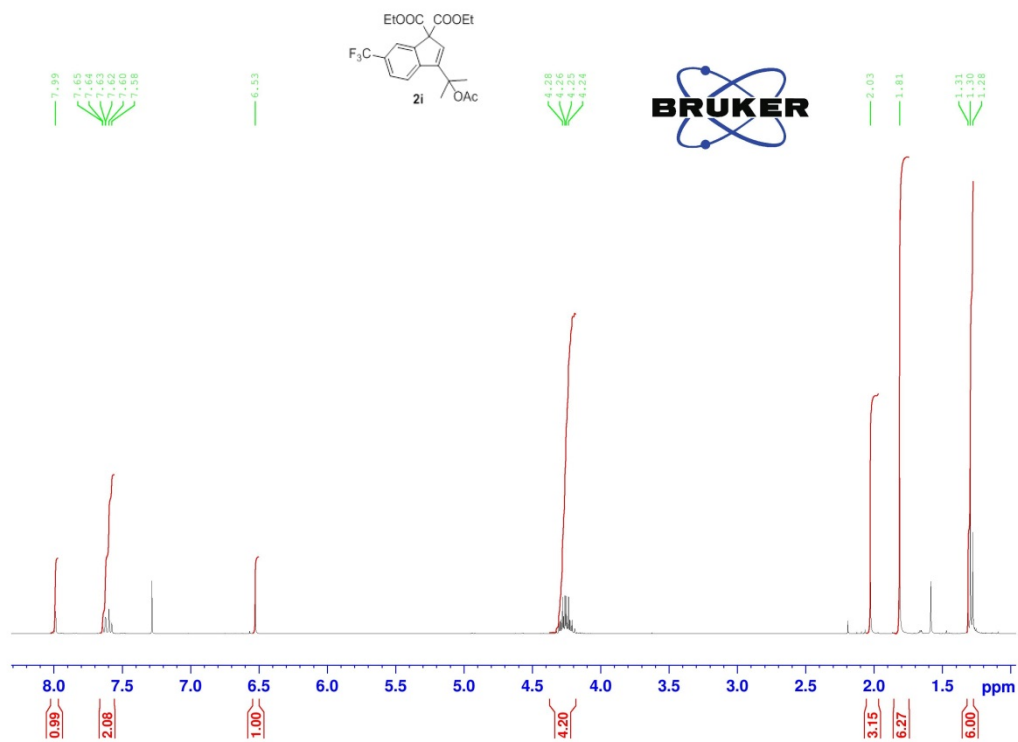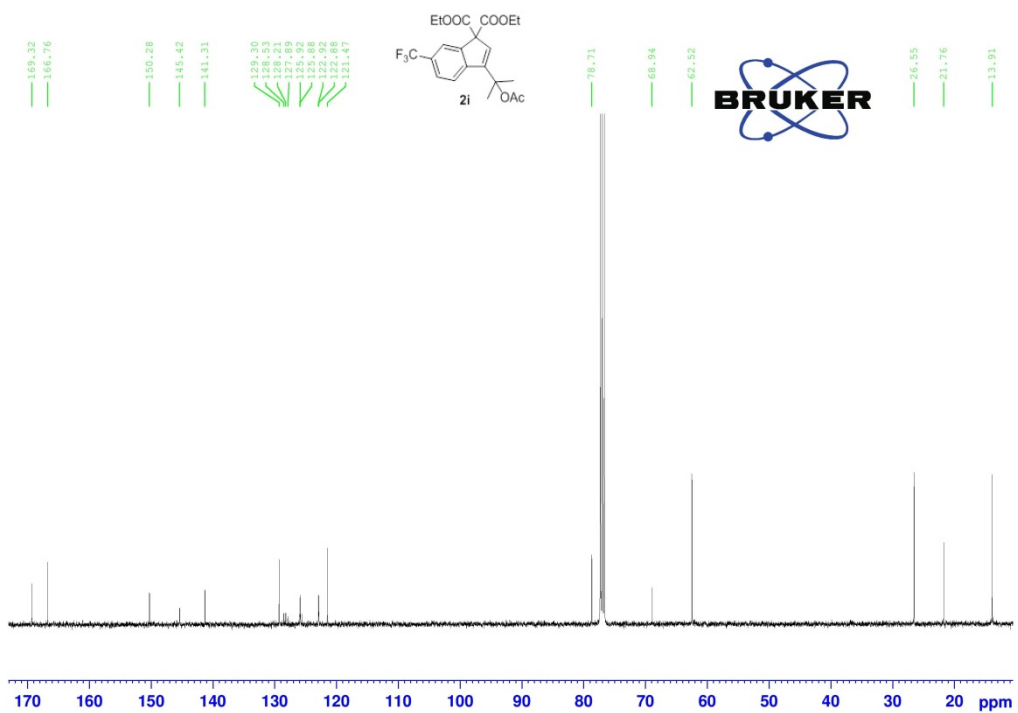

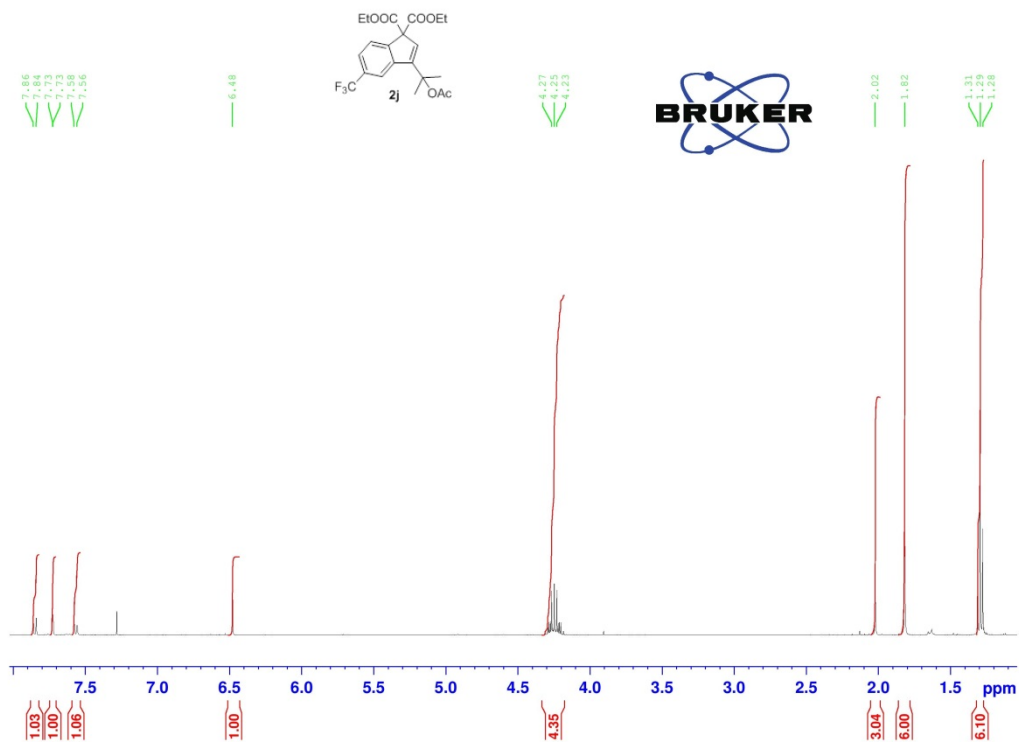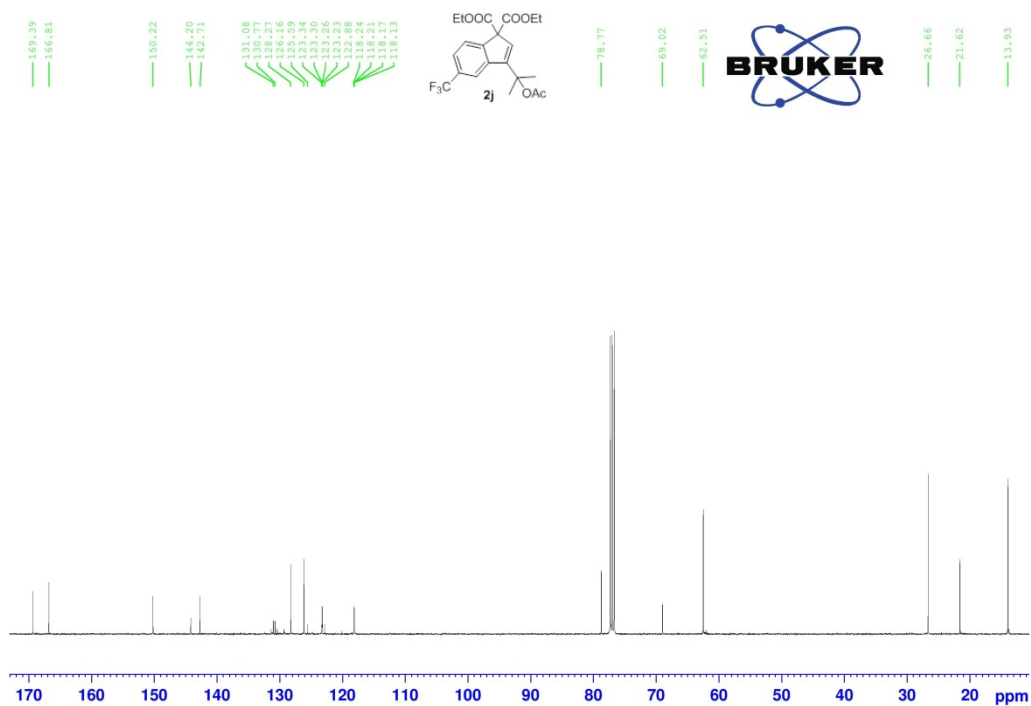

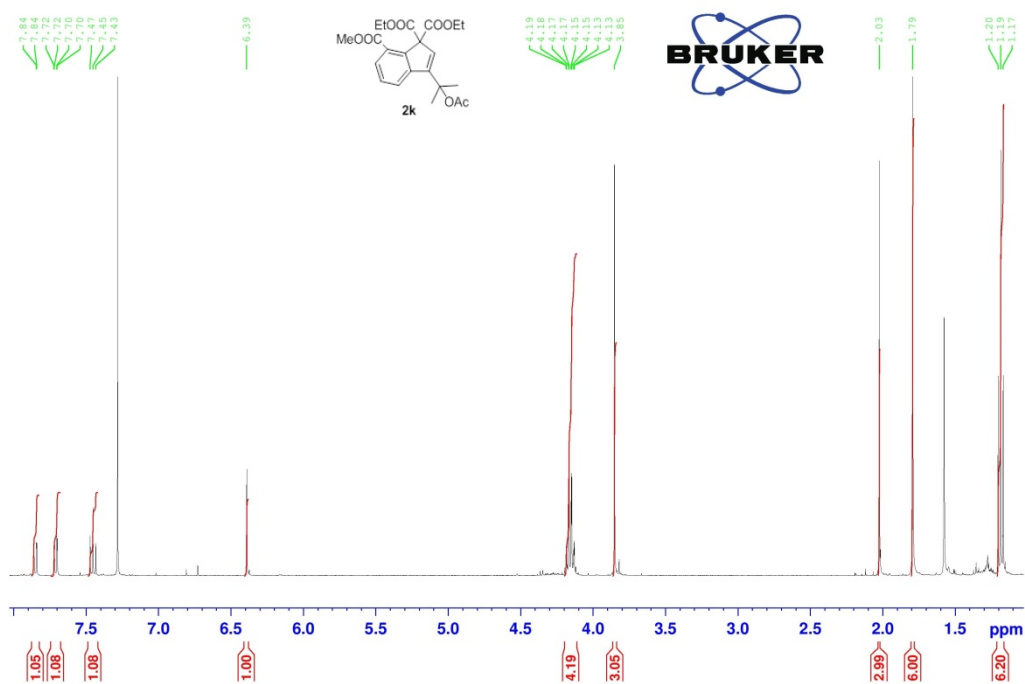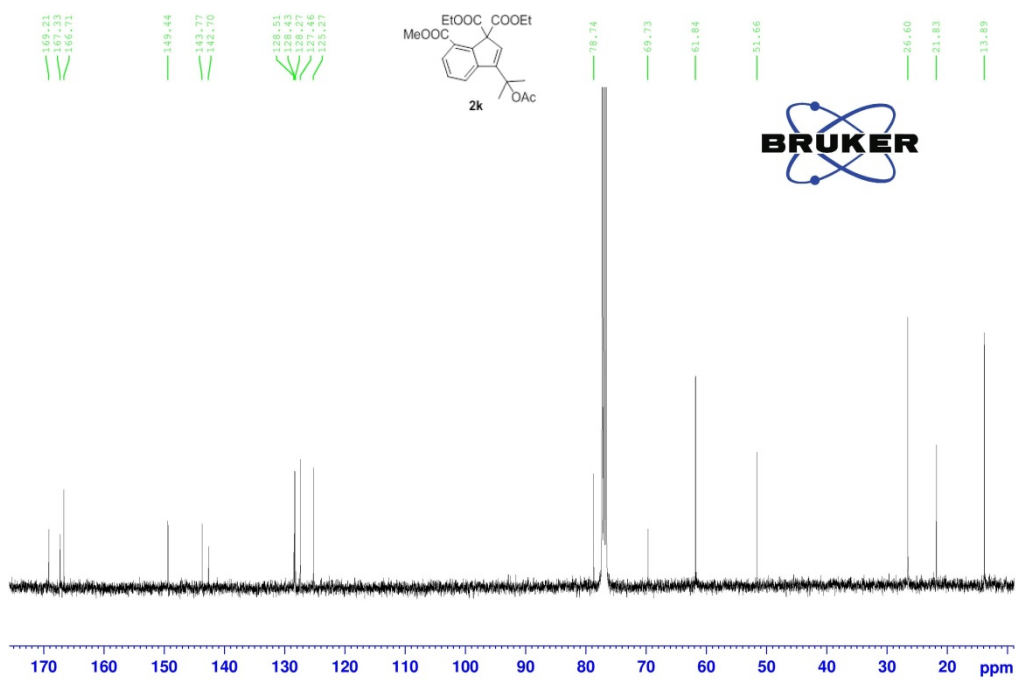

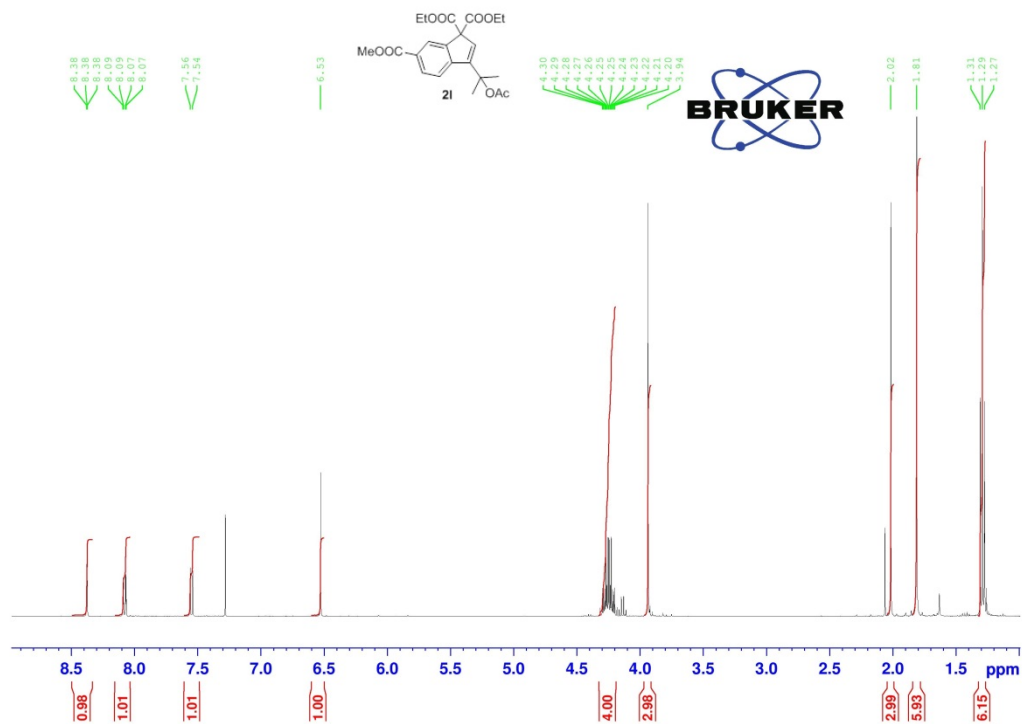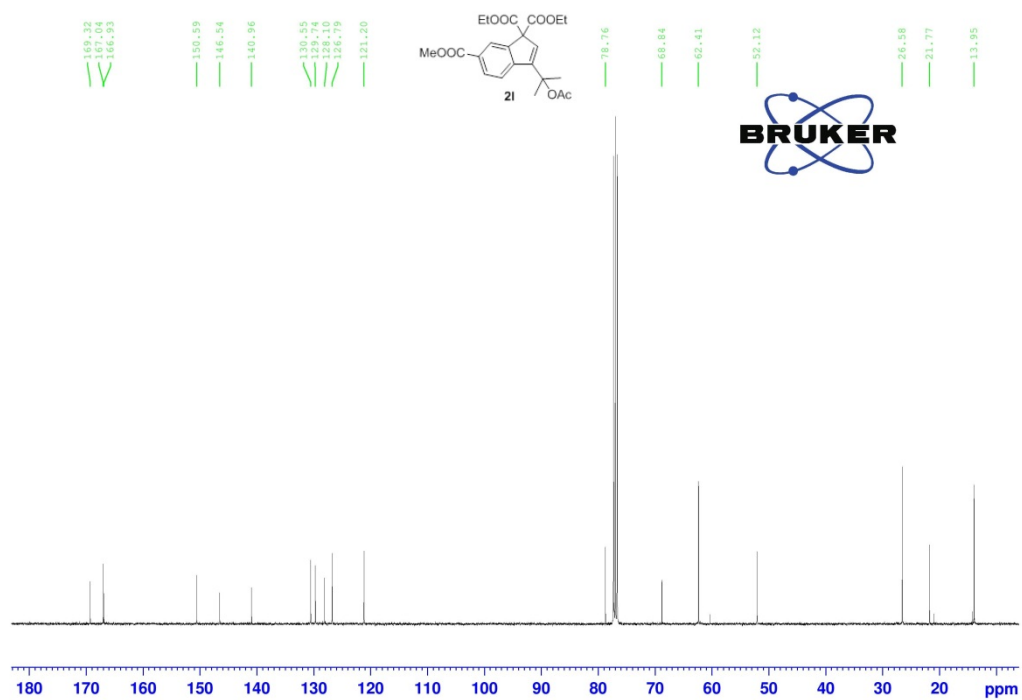

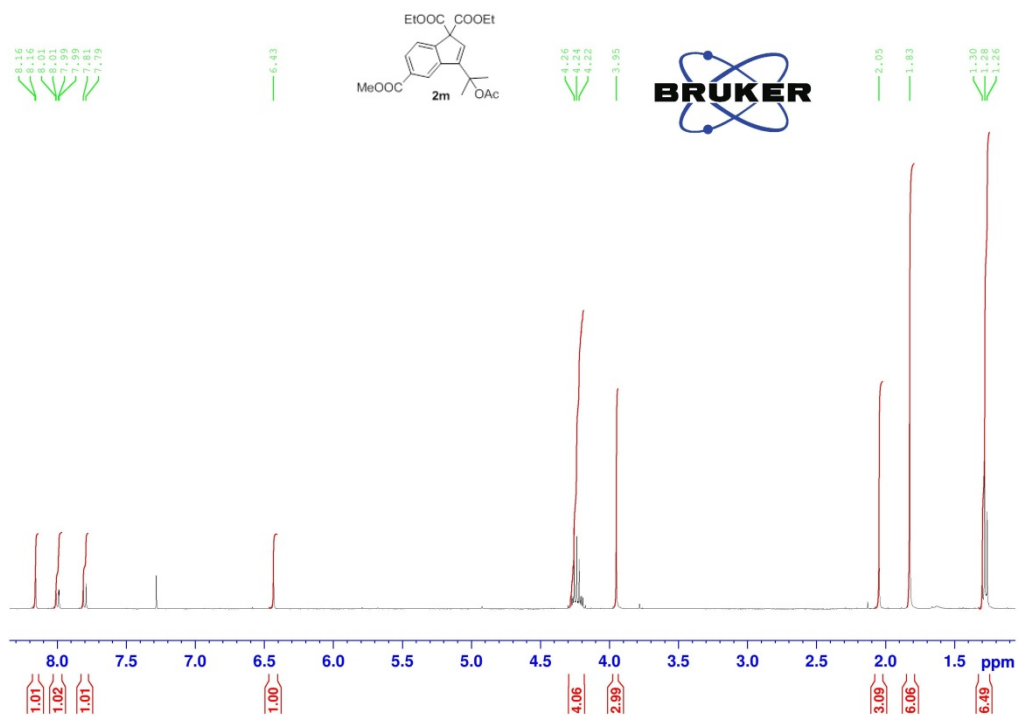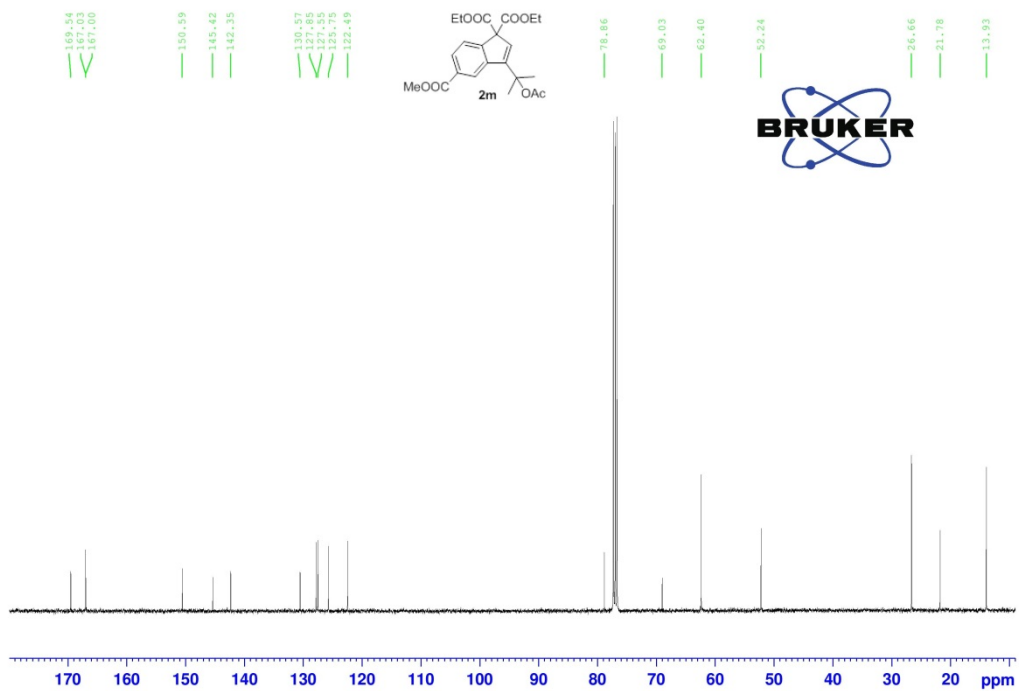

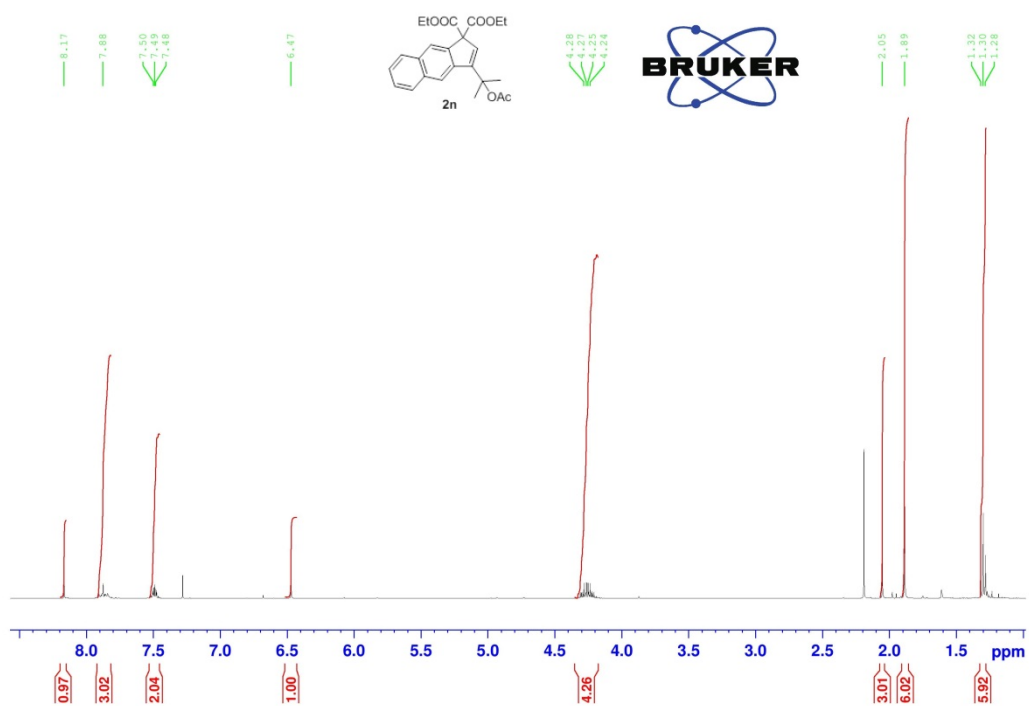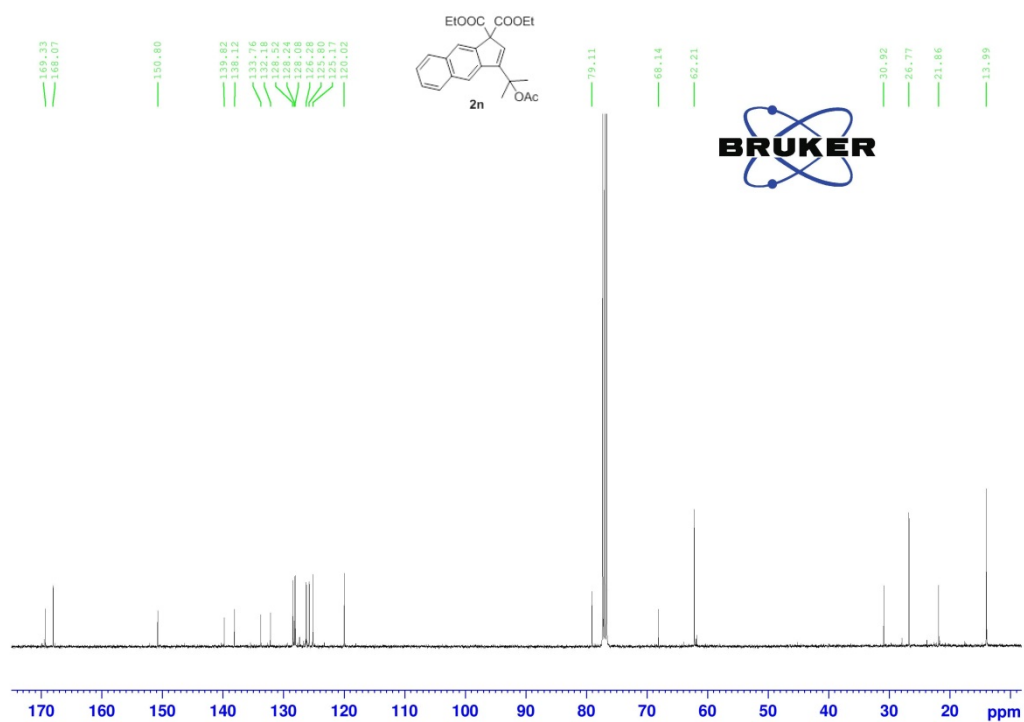



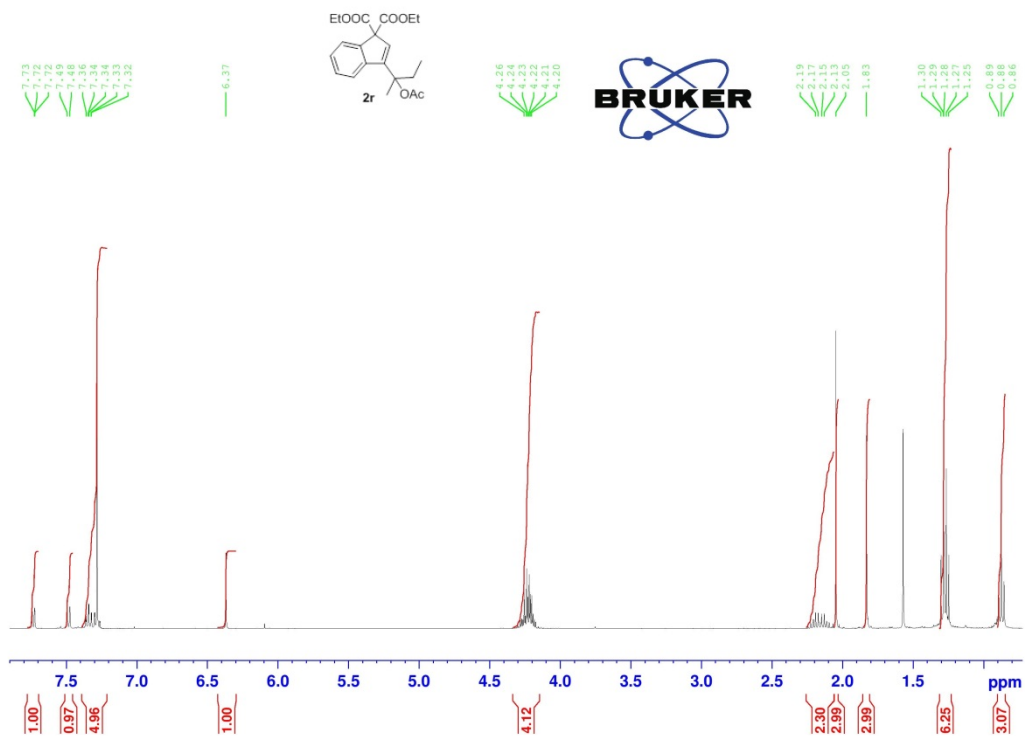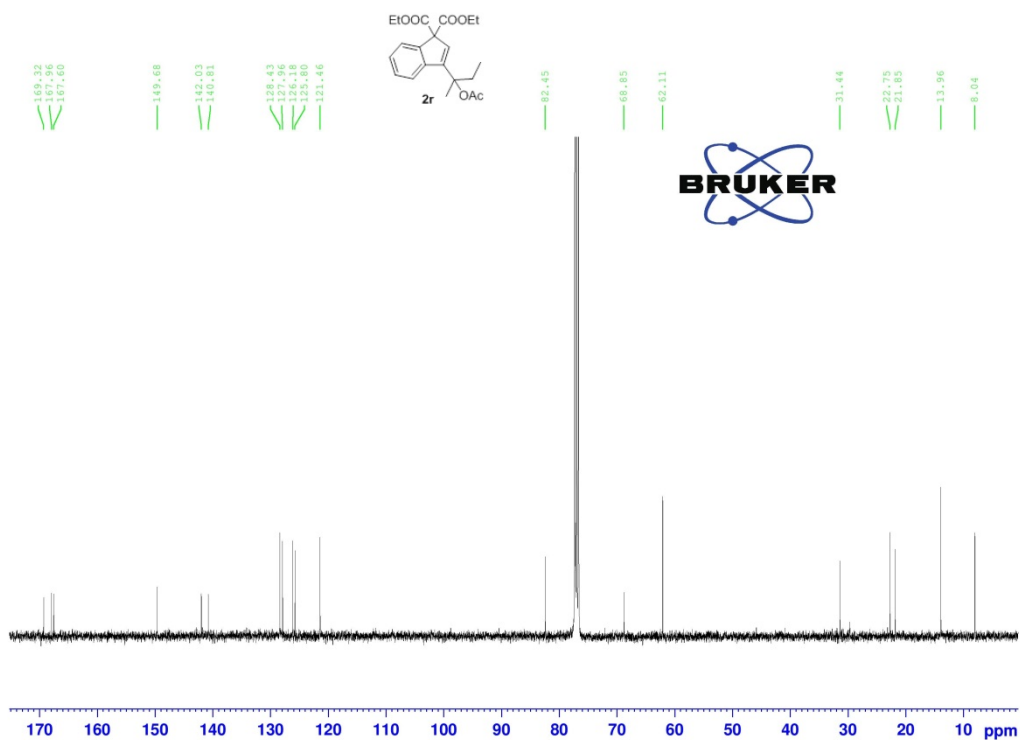

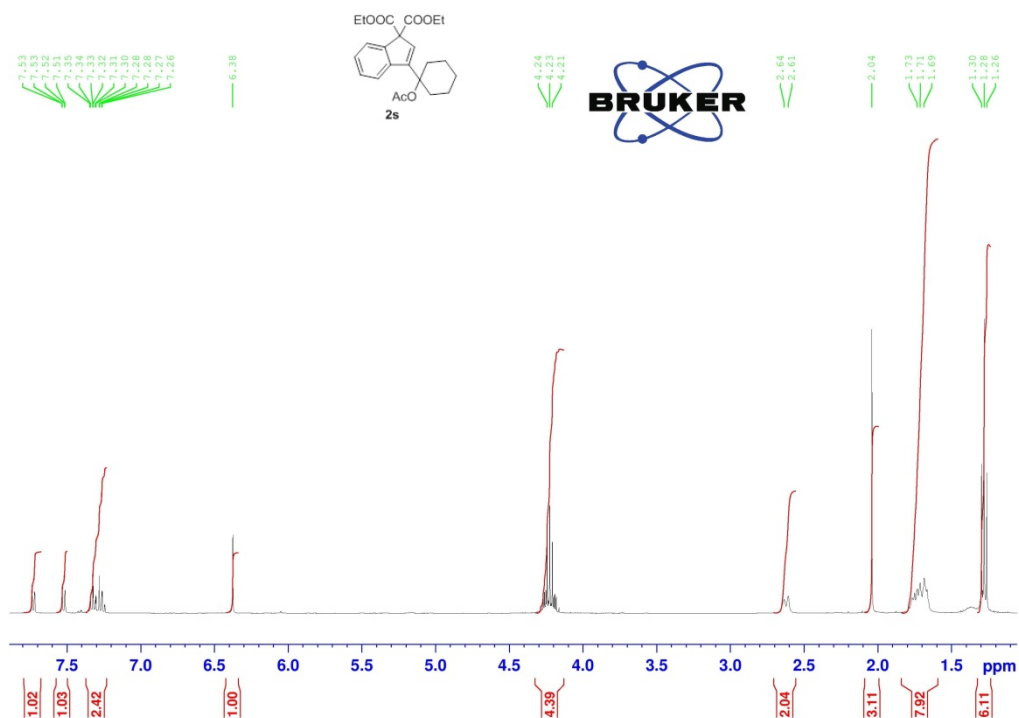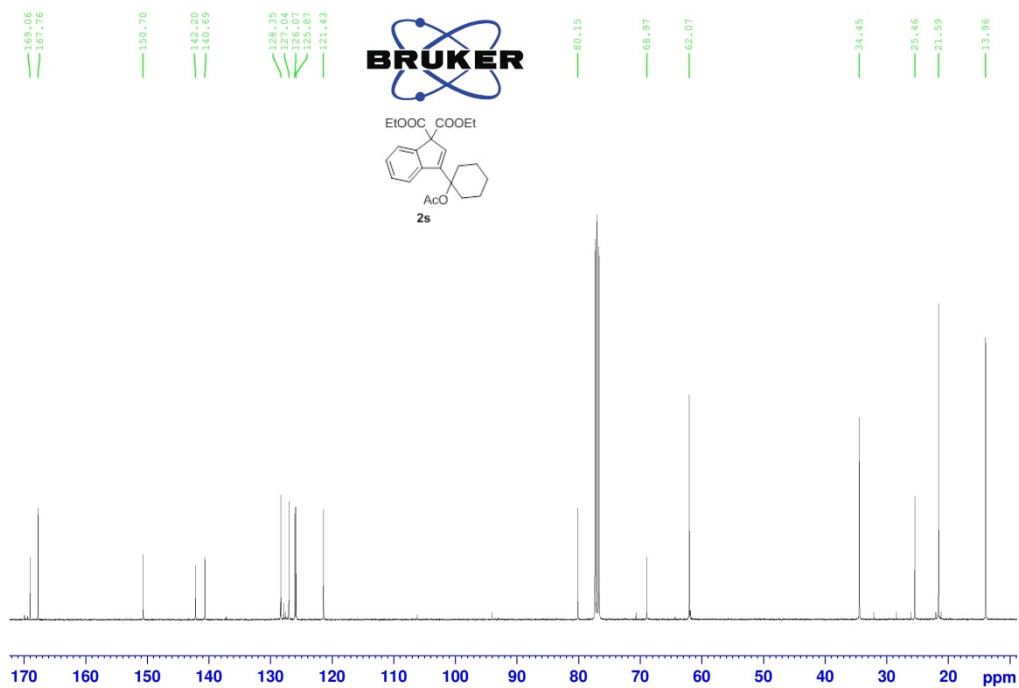

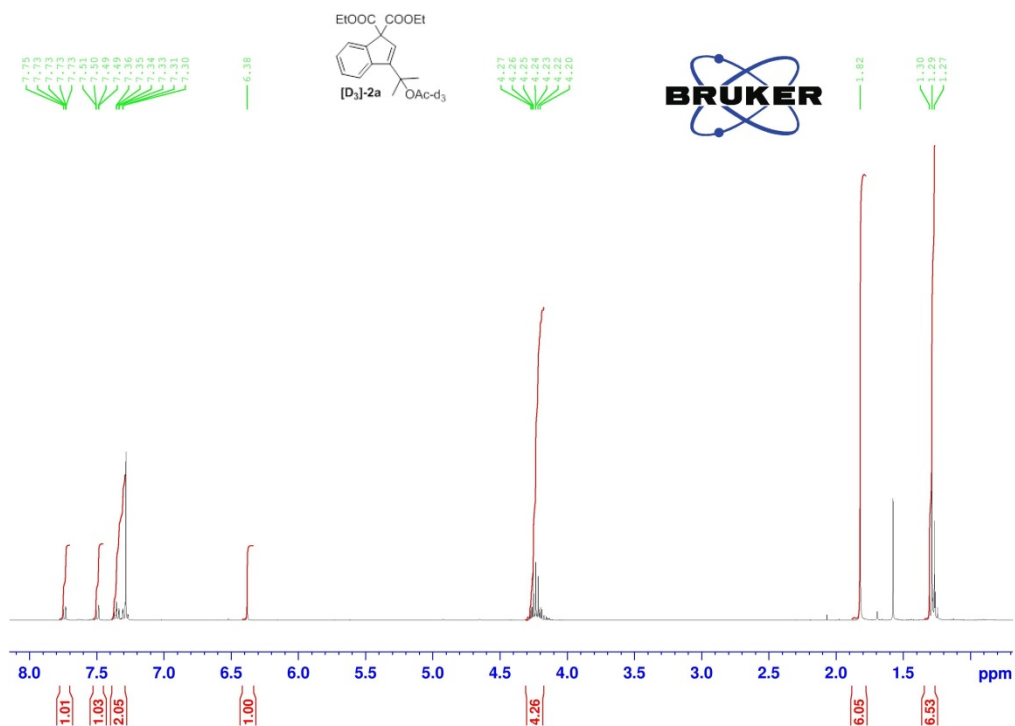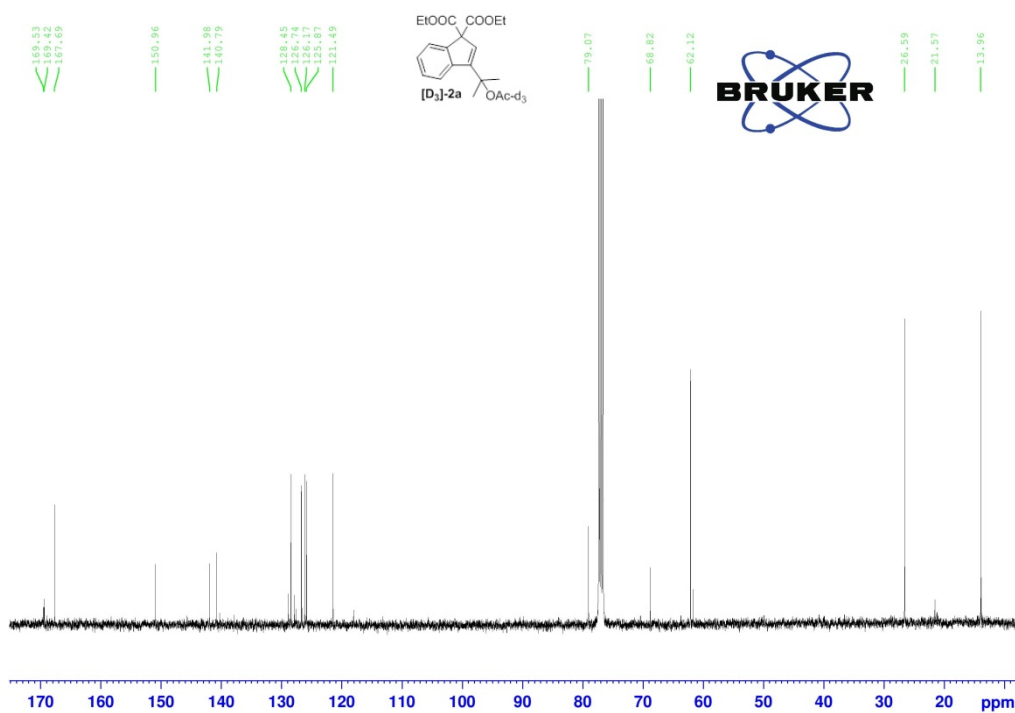

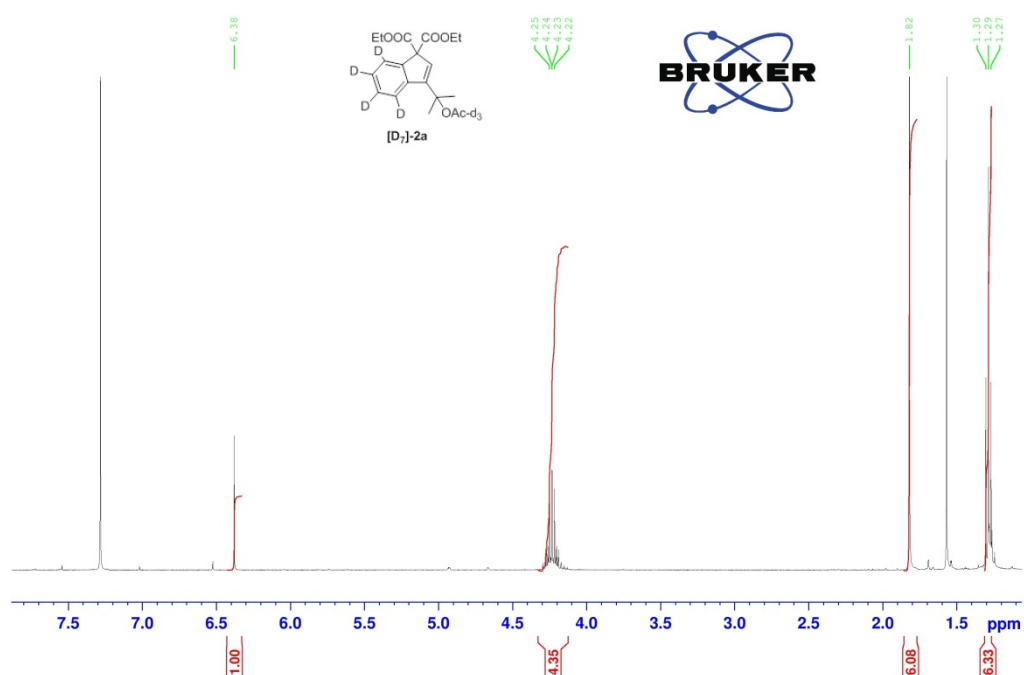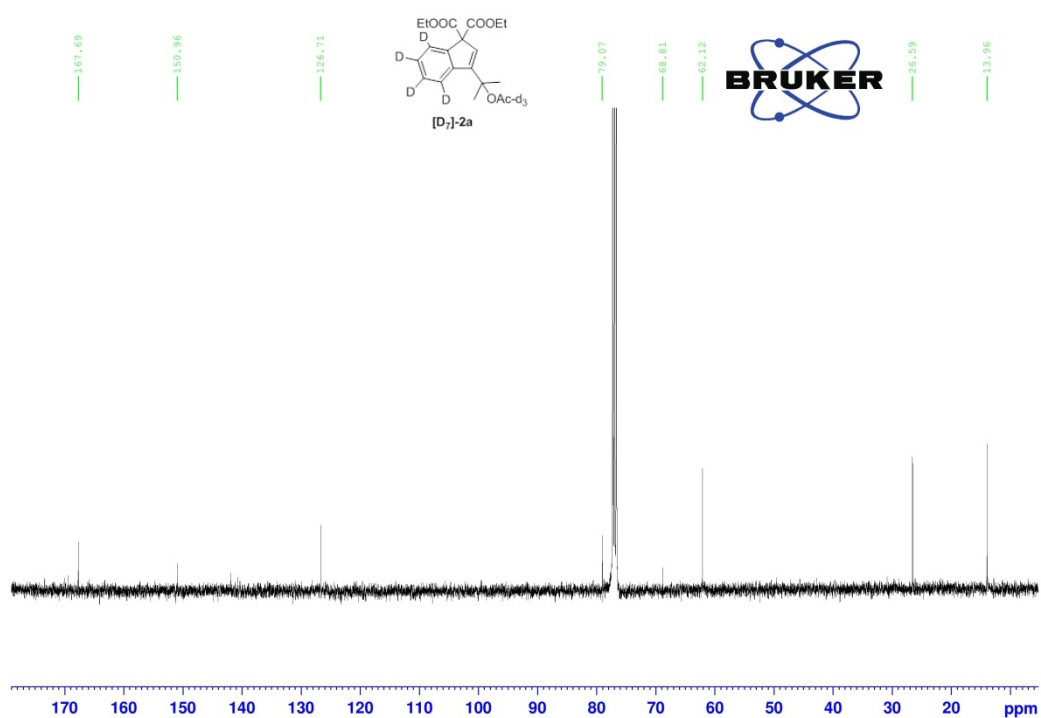

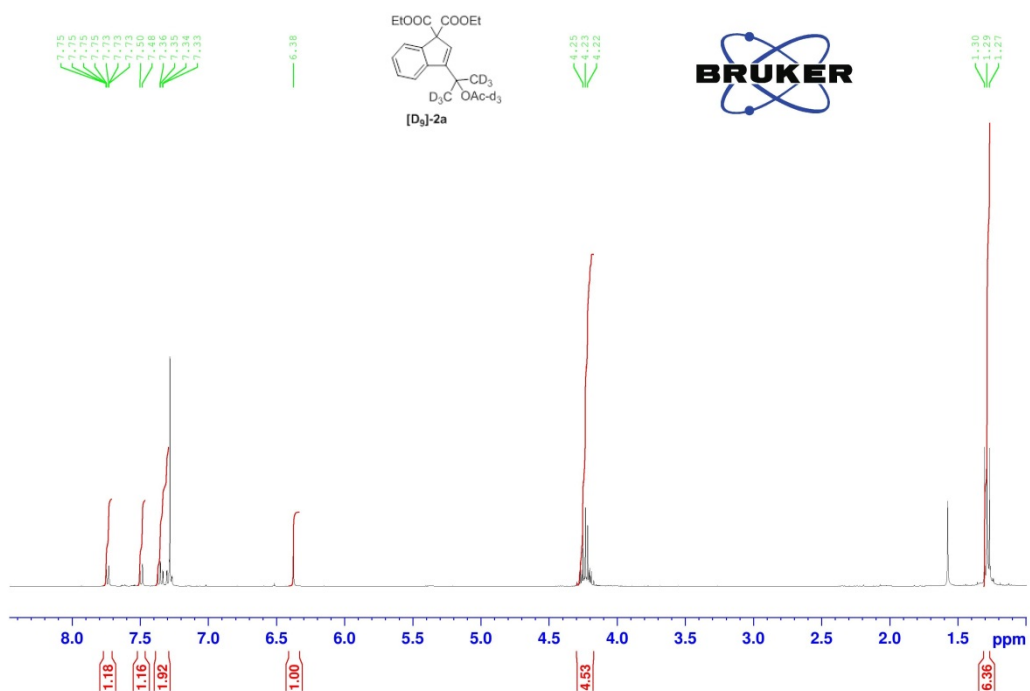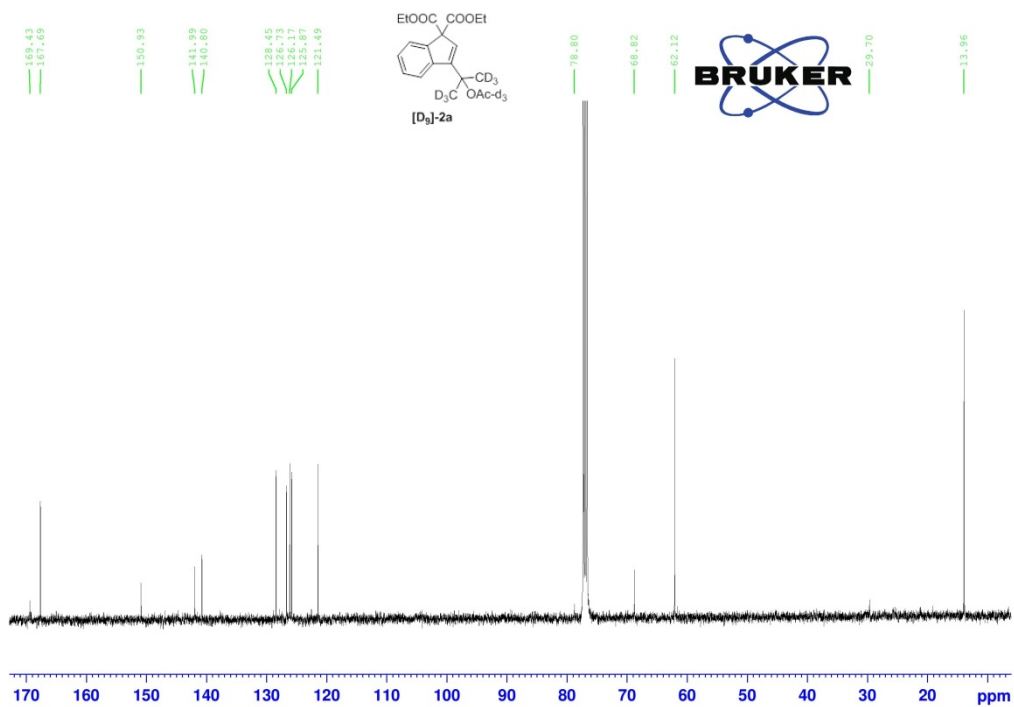

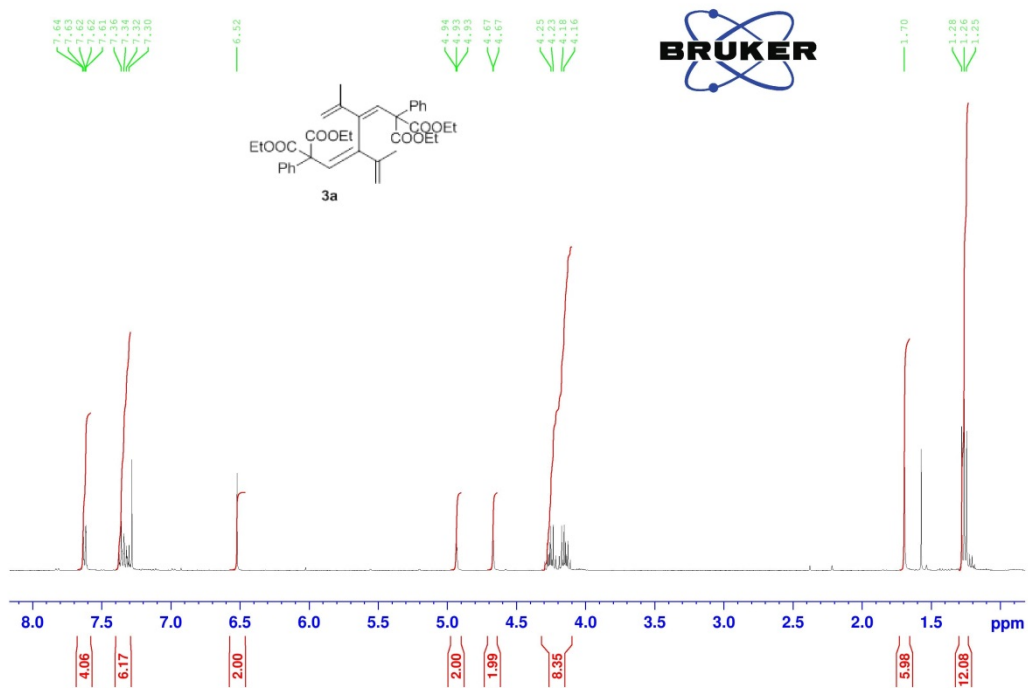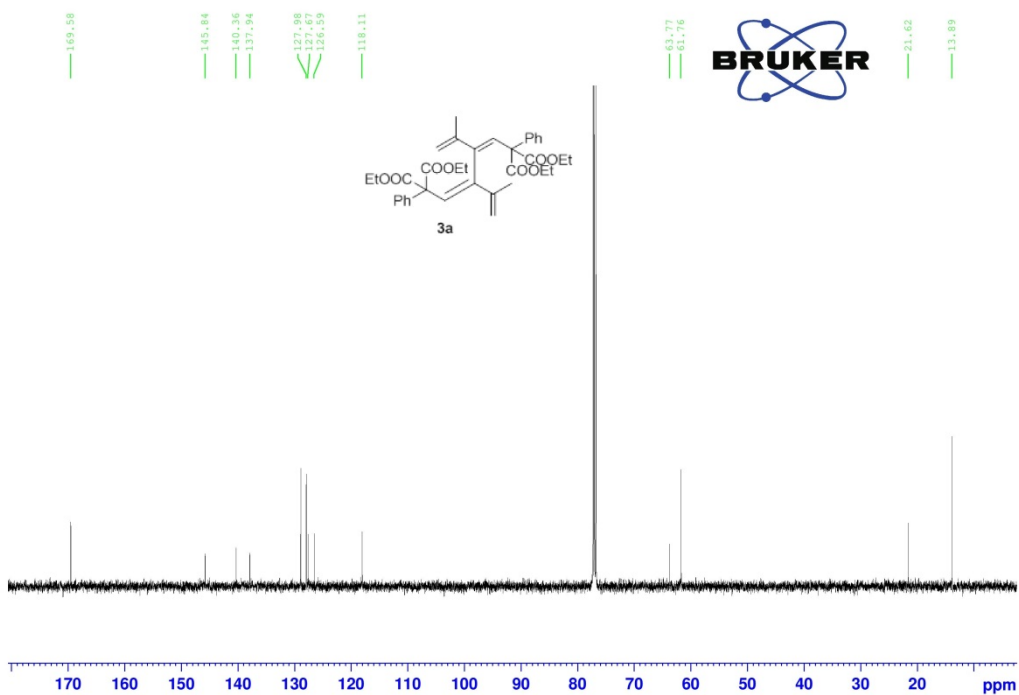

Supplement: ja5b06068_si_001.pdf [file ja5b06068_si_001.pdf]
